# Supplementary material for: Effectiveness of comprehensive cardiac rehabilitation in coronary artery disease patients treated according to contemporary evidence based medicine: Update of the Cardiac Rehabilitation Outcome Study (CROS-II)
Source: PubMed Central journal article supplement — Eur J Prev Cardiol. 2020 Feb 23;27(16):1756–74. doi: 10.1177/2047487320905719 (PMC7564293; doi:10.1177/2047487320905719), 2020-02-23
Supplement: CPR905719_Supplemental_Material.pdf [file CPR905719_Supplemental_Material.pdf]

## **Supplemental material (SM)**

### **Effectiveness of Comprehensive Cardiac Rehabilitation in CAD-Patients Treated According to Contemporary Evidence Based Medicine – Update of the Cardiac Rehabilitation Outcome Study (CROS-II)**

Annett Salzwedel<sup>1</sup>, Katrin Jensen<sup>2</sup>, Bernhard Rauch<sup>3</sup>, Patrick Doherty<sup>4</sup>,  
Maria-Inti Metzendorf<sup>5</sup>, Matthes Hackbusch<sup>2</sup>, Heinz Völler<sup>1</sup>, Jean-Paul Schmid<sup>6</sup>  
and Constantinos H Davos<sup>7</sup>; on behalf of the ‘Cardiac Rehabilitation Section’, European Association of Preventive Cardiology (EAPC), in cooperation with the Institute of Medical Biometry and Informatics (IMBI), Department of Medical Biometry, University of Heidelberg, and the Cochrane Metabolic and Endocrine Disorders Group, Institute of General Practice, Heinrich-Heine University, Düsseldorf, Germany

<sup>1</sup>Department of Rehabilitation Research, University of Potsdam, Germany; <sup>2</sup>Institute of Medical Biometry and Informatics (IMBI), University of Heidelberg, Germany; <sup>3</sup>Institut für Herzinfarktforschung Ludwigshafen, Germany; <sup>4</sup>Department of Health Sciences, University of York, UK; <sup>5</sup>Cochrane Metabolic and Endocrine Disorders Group, Institute of General Practice, Medical Faculty of the Heinrich-Heine-University Düsseldorf, Germany; <sup>6</sup>Department of Cardiology Spital Tiefenau, Switzerland; <sup>7</sup>Cardiovascular Research Laboratory, Biomedical Research Foundation, Academy of Athens, Greece

**Corresponding author:** Constantinos H Davos, vascular Research Laboratory, Biomedical Research Foundation, Academy of Athens, 4 Soranou Ephessiou Street, 11527 Athens Greece, Email: cdavos@bioacademy.gr

---

#### **Contents:**

|                                                                                                                      |         |
|----------------------------------------------------------------------------------------------------------------------|---------|
| Table SM 1: CROS inclusion criteria (PICOs)                                                                          | page 2  |
| Table SM 2: Search sources                                                                                           | page 3  |
| Table SM 3a: Studies selected for quantitative analysis (CROS I); baseline study characteristics and overall results | page 7  |
| Table SM 3b: Studies selected for quantitative analysis (CROS I); reported exercise volumes                          | page 24 |
| Table SM 4: Excluded studies and justification for exclusion                                                         | page 26 |
| Table SM 5: Study evaluation: Newcastle – Ottawa Scale (NOS)                                                         | page 37 |
| Table SM 6: Sensitivity analyses                                                                                     | page 38 |
| Table SM 7: Checklist according to MOOSE and PRISMA statements                                                       | page 39 |
| References                                                                                                           | Page 41 |

---

**Table SM 1: CROS inclusion criteria (PICOs)**

|                                                            |                                                                                                                                                                                                                                                                                                                                                                                                                                                                                                                                                                                                                                                    |
|------------------------------------------------------------|----------------------------------------------------------------------------------------------------------------------------------------------------------------------------------------------------------------------------------------------------------------------------------------------------------------------------------------------------------------------------------------------------------------------------------------------------------------------------------------------------------------------------------------------------------------------------------------------------------------------------------------------------|
| <b>Population (P)</b>                                      | <b>(1) After ACS, (2) After CABG, (3) Mixed population</b>                                                                                                                                                                                                                                                                                                                                                                                                                                                                                                                                                                                         |
| Age                                                        | No restriction                                                                                                                                                                                                                                                                                                                                                                                                                                                                                                                                                                                                                                     |
| Time of index events                                       | 1995 or later*                                                                                                                                                                                                                                                                                                                                                                                                                                                                                                                                                                                                                                     |
| Minimal standards of acute treatment                       | in-hospital standard therapy according to actual guidelines                                                                                                                                                                                                                                                                                                                                                                                                                                                                                                                                                                                        |
| <b>Intervention (I)</b>                                    | <b>Multi-component cardiac rehabilitation (CR)</b>                                                                                                                                                                                                                                                                                                                                                                                                                                                                                                                                                                                                 |
| Start                                                      | Not later than 3 months after hospital discharge                                                                                                                                                                                                                                                                                                                                                                                                                                                                                                                                                                                                   |
| Supervision                                                | CR must be under supervision and responsibility of a rehabilitation center (center-based CR)                                                                                                                                                                                                                                                                                                                                                                                                                                                                                                                                                       |
| Definition of “multi-component”                            | CR including supervised and structured physical exercise at least twice a week as basic requirement plus at least one, preferably more, of the following components: Information, motivational techniques, education, psychological support and interventions, social and vocational support                                                                                                                                                                                                                                                                                                                                                       |
| CR setting                                                 | In-patient, out-patient or mixed. Tele-rehabilitation will be included as long as the major part of CR sessions is center-based and all other predefined criteria are fulfilled                                                                                                                                                                                                                                                                                                                                                                                                                                                                    |
| <b>Control (C)</b>                                         | <b>Usual care</b>                                                                                                                                                                                                                                                                                                                                                                                                                                                                                                                                                                                                                                  |
| Definition                                                 | Patients with index event, but not participating in CR.<br>Patients of the control group may be supervised by general practitioners and/or resident cardiologists. They also may participate in non-structured and non-supervised exercise programs outside a CR program.                                                                                                                                                                                                                                                                                                                                                                          |
| <b>Outcomes (O);</b> clinical course after the index event |                                                                                                                                                                                                                                                                                                                                                                                                                                                                                                                                                                                                                                                    |
| Primary outcome                                            | (1) Total mortality                                                                                                                                                                                                                                                                                                                                                                                                                                                                                                                                                                                                                                |
| Secondary outcomes                                         | (2) Cardiovascular mortality<br>(3) Major cardiovascular and cerebrovascular events (MACCE = combined endpoint of death, non – fatal myocardial infarction, non – fatal stroke<br>(4) Non – fatal myocardial infarction<br>(5) Non – fatal stroke<br>(6) Hospital readmission for any reason<br>(7) Unplanned hospital readmission for any cardiovascular event<br>(8) Unplanned coronary revascularization<br>(9) Cardiovascular mortality + admission for any cardiovascular event<br>(10) All combined endpoints including fatal and non-fatal events not predefined (amendment by the CROS steering committee January 18 <sup>th</sup> , 2015) |
| Observation period                                         | 6 months or more after hospital discharge                                                                                                                                                                                                                                                                                                                                                                                                                                                                                                                                                                                                          |
| <b>Study designs and biometry</b>                          |                                                                                                                                                                                                                                                                                                                                                                                                                                                                                                                                                                                                                                                    |
| Study designs included                                     | Randomized controlled trials (RCT); prospective and retrospective cohort studies with a control group (pCCT, rCCT)                                                                                                                                                                                                                                                                                                                                                                                                                                                                                                                                 |
| Biometry                                                   | Cohort studies must provide a description of data sources, should have used methods to reduce risk of selection bias, e.g. linear regression analysis, propensity score methods, should provide information on dealing with patients lost at follow-up and missing data                                                                                                                                                                                                                                                                                                                                                                            |

\* Studies including patients before and after 1995 were only included into the analysis, if the vast majority of patients was treated in 1995 or later

**Table SM 2: Search sources**

|                                                                                                                                                                                                                                                                                                                                                                                                                                                                                                                                                                                                                                                                                                                                                                                                                                                                                                                                                                                                                                                                                                                                                                                                                                                                                                                                                                                                                                                                                                                                                                                                                                                                                                                                                                                                                                                                                                                                                                                                                                                                                                                                                                                                                                                                                                                                                                                                                                                                                                                             |
|-----------------------------------------------------------------------------------------------------------------------------------------------------------------------------------------------------------------------------------------------------------------------------------------------------------------------------------------------------------------------------------------------------------------------------------------------------------------------------------------------------------------------------------------------------------------------------------------------------------------------------------------------------------------------------------------------------------------------------------------------------------------------------------------------------------------------------------------------------------------------------------------------------------------------------------------------------------------------------------------------------------------------------------------------------------------------------------------------------------------------------------------------------------------------------------------------------------------------------------------------------------------------------------------------------------------------------------------------------------------------------------------------------------------------------------------------------------------------------------------------------------------------------------------------------------------------------------------------------------------------------------------------------------------------------------------------------------------------------------------------------------------------------------------------------------------------------------------------------------------------------------------------------------------------------------------------------------------------------------------------------------------------------------------------------------------------------------------------------------------------------------------------------------------------------------------------------------------------------------------------------------------------------------------------------------------------------------------------------------------------------------------------------------------------------------------------------------------------------------------------------------------------------|
| <p><b>Medline:</b> Search interface: PubMed – Date of search: Sept 4 2018<br/>(includes segments "Medline", "Pubmed – as supplied by publisher", "PubMed- in process", "PubMed – pubmednotmedline")</p>                                                                                                                                                                                                                                                                                                                                                                                                                                                                                                                                                                                                                                                                                                                                                                                                                                                                                                                                                                                                                                                                                                                                                                                                                                                                                                                                                                                                                                                                                                                                                                                                                                                                                                                                                                                                                                                                                                                                                                                                                                                                                                                                                                                                                                                                                                                     |
| <p>#1 "Acute Coronary Syndrome"[mh] OR "Angina, Unstable"[mh] OR "Coronary Occlusion"[mh] OR "Coronary Thrombosis"[mh] OR "Myocardial Infarction"[mh] OR "Myocardial Revascularization"[mh] OR myocardial infarct*[tiab] OR coronary infarct*[tiab] OR cardiac infarct*[tiab] OR heart infarct*[tiab] OR postmyocardial infarct*[tiab] OR "post-MI"[tiab] OR heart attack*[tiab] OR coronary attack*[tiab] OR cardiac attack*[tiab] OR myocardial attack*[tiab] OR cardiac event*[tiab] OR coronary event*[tiab] OR myocardial event*[tiab] OR coronary syndrome*[tiab] OR cardiac syndrome*[tiab] OR myocardial syndrome*[tiab] OR "bypass grafting"[tiab] OR "coronary artery bypass"[tiab] OR "coronary bypass"[tiab] OR "cardiac bypass"[tiab] OR coronary thromb*[tiab] OR intracoronary thromb*[tiab] OR coronary angioplast*[tiab] OR intracoronary angioplast*[tiab] OR cardiac angioplast*[tiab] OR coronary stent*[tiab] OR intracoronary stent*[tiab] OR cardiac stent*[tiab] OR coronary intervention*[tiab] OR intracoronary intervention*[tiab] OR cardiac intervention*[tiab] OR coronary reperfusion*[tiab] OR intracoronary reperfusion*[tiab] OR cardiac reperfusion*[tiab] OR myocardial revasculari*[tiab] OR coronary revasculari*[tiab] OR cardiac revasculari*[tiab] OR "myocardial stunning"[tiab] OR "cardiac stunning"[tiab]</p> <p>#2 "Rehabilitation"[mh] OR "Rehabilitation"[sh] OR "Rehabilitation Centers"[mh:noexp] OR "Secondary Prevention"[mh] OR rehabilitat*[tiab] OR rehab[tiab] OR cardiorehabilit*[tiab] OR secondary prevent*[tiab] OR program[tiab] OR programme[tiab] OR programs[tiab] OR programmes[tiab]</p> <p>#3 #1 AND #2</p> <p>#4 "cardiac rehabilitation"[tiab]</p> <p>#5 #3 OR #4</p> <p>#6 <i>[Cochrane HSSS filter]</i> (randomized controlled trial[pt] OR controlled clinical trial[pt] OR randomized[tiab] OR placebo[tiab] OR drug therapy[sh] OR randomly[tiab] OR trial[tiab] OR groups[tiab]) NOT (animals[mh] NOT humans[mh])</p> <p>#7 <i>[Own filter]</i> "cohort studies"[mh:noexp] OR "follow-up studies"[mh] OR "longitudinal studies"[mh] OR "prospective studies"[mh] OR cohort*[tiab] OR prospectiv*[tiab] OR longitudinal*[tiab] OR follow-up*[tiab] OR followup*[tiab] OR "retrospective studies"[mh] OR retrospectiv*[tiab]</p> <p>#8 #6 OR #7</p> <p>#9 #5 AND #8</p> <p>#10 #9 AND medline[sb]</p> <p>#11 #5 NOT medline[sb]</p> <p>#12 #10 OR #11</p> <p>#13 #12 NOT pmcbook</p> <p>#14 2015/12/15:2018/12/31[edat]</p> <p>#15 #13 AND #14</p> |
| <p><b>Embase:</b> Search interface: Ovid SP – Date of search: Sept 4 2018 (Embase 1974 to 2018 August 31)</p>                                                                                                                                                                                                                                                                                                                                                                                                                                                                                                                                                                                                                                                                                                                                                                                                                                                                                                                                                                                                                                                                                                                                                                                                                                                                                                                                                                                                                                                                                                                                                                                                                                                                                                                                                                                                                                                                                                                                                                                                                                                                                                                                                                                                                                                                                                                                                                                                               |

|                                                                                                                                                                                                                                                                                                                                                                                                                                                                                                                                                                                                                                                                                                                                                                                                                                                                                                                                                                                                                                                                                                                                                                                                                                                                                                                                                                                                                                                                                                                                                                                                                                                                                                                                                                                                                                                                                                               |
|---------------------------------------------------------------------------------------------------------------------------------------------------------------------------------------------------------------------------------------------------------------------------------------------------------------------------------------------------------------------------------------------------------------------------------------------------------------------------------------------------------------------------------------------------------------------------------------------------------------------------------------------------------------------------------------------------------------------------------------------------------------------------------------------------------------------------------------------------------------------------------------------------------------------------------------------------------------------------------------------------------------------------------------------------------------------------------------------------------------------------------------------------------------------------------------------------------------------------------------------------------------------------------------------------------------------------------------------------------------------------------------------------------------------------------------------------------------------------------------------------------------------------------------------------------------------------------------------------------------------------------------------------------------------------------------------------------------------------------------------------------------------------------------------------------------------------------------------------------------------------------------------------------------|
| <p>#1 exp acute coronary syndrome/ or coronary artery thrombosis/ or exp percutaneous coronary intervention/ or exp unstable angina pectoris/ or exp heart infarction/ or exp coronary artery surgery/</p> <p>#2 (myocardial infarct* or coronary infarct* or cardiac infarct* or heart infarct* or postmyocardial infarct* or post-MI or heart attack* or coronary attack* or cardiac attack* or cardiac event* or coronary event* or coronary syndrome or cardiac syndrome or bypass grafting or coronary artery bypass or coronary bypass or cardiac bypass or coronary thromb* or intracoronary thromb* or coronary angioplast* or intracoronary angioplast* or cardiac angioplast* or coronary stent* or intracoronary stent* or cardiac stent* or coronary intervention* or intracoronary intervention* or cardiac intervention* or coronary reperfusion* or intracoronary reperfusion* or cardiac reperfusion* or myocardial revasculari* or coronary revasculari* or cardiac revasculari* or myocardial stunning or cardiac stunning).tw.</p> <p>#3 1 or 2</p> <p>#4 rehabilitation/ or heart rehabilitation/ or functional assessment/ or functional training/ or rehabilitation center/ or secondary prevention/</p> <p>#5 (rehabilitat* or rehab or cardiorehabilit*).tw.</p> <p>#6 4 or 5</p> <p>#7 3 and 6</p> <p>#8 "cardiac rehabilitation".tw.</p> <p>#9 7 or 8</p> <p>#10 limit 9 to yr=1995-Current</p> <p>#11 [Wong 2006 Embase filter] random*.tw. or clinical trial*.mp. or exp health care quality/</p> <p>#12 [Own filter] cohort analysis/ or longitudinal study/ or prospective study/ or follow up/ or retrospective study/ or (cohort* or prospectiv* or longitudinal* or follow-up* or followup* or retrospectiv*).tw.</p> <p>#13 11 or 12</p> <p>#14 10 and 13</p> <p>#15 (201512* or 2016* or 2017* or 2018*).dc.</p> <p>#16 14 and 15</p> <p>#17 remove duplicates from 16</p> |
| <p><b>Cochrane Central Register of Controlled Trials:</b> Search interface: Cochrane Library – Date of search: Sept 04 2018 (Issue 8 of 12, 2018)</p>                                                                                                                                                                                                                                                                                                                                                                                                                                                                                                                                                                                                                                                                                                                                                                                                                                                                                                                                                                                                                                                                                                                                                                                                                                                                                                                                                                                                                                                                                                                                                                                                                                                                                                                                                         |
| <p>#1 MeSH descriptor: [Acute Coronary Syndrome] explode all trees</p> <p>#2 MeSH descriptor: [Angina, Unstable] explode all trees</p> <p>#3 MeSH descriptor: [Coronary Occlusion] explode all trees</p> <p>#4 MeSH descriptor: [Coronary Thrombosis] explode all trees</p> <p>#5 MeSH descriptor: [Myocardial Infarction] explode all trees</p>                                                                                                                                                                                                                                                                                                                                                                                                                                                                                                                                                                                                                                                                                                                                                                                                                                                                                                                                                                                                                                                                                                                                                                                                                                                                                                                                                                                                                                                                                                                                                              |

|                                                                                                                                                                                                                                                                                                                                                                                                                                                                                                                                                                                                                                                                                                                                                                                                                                                                                                                                                                                                                                                                                                                                                                                                                                                                                                                                                                                                                                                                     |                                                                                                                                                                                                                                                                                                                                                                                                                                                                                                                                                                                                                                                                                                                                                                                                                                                                                                                                                                                                                                             |
|---------------------------------------------------------------------------------------------------------------------------------------------------------------------------------------------------------------------------------------------------------------------------------------------------------------------------------------------------------------------------------------------------------------------------------------------------------------------------------------------------------------------------------------------------------------------------------------------------------------------------------------------------------------------------------------------------------------------------------------------------------------------------------------------------------------------------------------------------------------------------------------------------------------------------------------------------------------------------------------------------------------------------------------------------------------------------------------------------------------------------------------------------------------------------------------------------------------------------------------------------------------------------------------------------------------------------------------------------------------------------------------------------------------------------------------------------------------------|---------------------------------------------------------------------------------------------------------------------------------------------------------------------------------------------------------------------------------------------------------------------------------------------------------------------------------------------------------------------------------------------------------------------------------------------------------------------------------------------------------------------------------------------------------------------------------------------------------------------------------------------------------------------------------------------------------------------------------------------------------------------------------------------------------------------------------------------------------------------------------------------------------------------------------------------------------------------------------------------------------------------------------------------|
| #6                                                                                                                                                                                                                                                                                                                                                                                                                                                                                                                                                                                                                                                                                                                                                                                                                                                                                                                                                                                                                                                                                                                                                                                                                                                                                                                                                                                                                                                                  | MeSH descriptor: [Myocardial Revascularization] explode all trees                                                                                                                                                                                                                                                                                                                                                                                                                                                                                                                                                                                                                                                                                                                                                                                                                                                                                                                                                                           |
| #7                                                                                                                                                                                                                                                                                                                                                                                                                                                                                                                                                                                                                                                                                                                                                                                                                                                                                                                                                                                                                                                                                                                                                                                                                                                                                                                                                                                                                                                                  | ("myocardial infarct*" or "coronary infarct*" or "cardiac infarct*" or "heart infarct*" or "postmyocardial infarct*" or "post-MI" or "AMI" or "STEMI" or "NSTEMI" or "heart attack*" or "coronary attack*" or "cardiac attack*" or "myocardial attack*" or "cardiac event*" or "coronary event*" or "myocardial event*" or "coronary syndrome*" or "cardiac syndrome*" or "myocardial syndrome*" or "bypass grafting" or "coronary artery bypass" or "coronary bypass" or "cardiac bypass" or "CABG" or "coronary thromb*" or "intracoronary thromb*" or "coronary angioplast*" or "intracoronary angioplast*" or "cardiac angioplast*" or "coronary stent*" or "intracoronary stent*" or "cardiac stent*" or "PCI" or "coronary intervention*" or "intracoronary intervention*" or "cardiac intervention*" or "coronary reperfusion*" or "intracoronary reperfusion*" or "cardiac reperfusion*" or "myocardial revasculari*" or "coronary revasculari*" or "cardiac revasculari*" or "myocardial stunning" or "cardiac stunning"):ti,ab,kw |
| #8                                                                                                                                                                                                                                                                                                                                                                                                                                                                                                                                                                                                                                                                                                                                                                                                                                                                                                                                                                                                                                                                                                                                                                                                                                                                                                                                                                                                                                                                  | #1 or #2 or #3 or #4 or #5 or #6 or #7                                                                                                                                                                                                                                                                                                                                                                                                                                                                                                                                                                                                                                                                                                                                                                                                                                                                                                                                                                                                      |
| #9                                                                                                                                                                                                                                                                                                                                                                                                                                                                                                                                                                                                                                                                                                                                                                                                                                                                                                                                                                                                                                                                                                                                                                                                                                                                                                                                                                                                                                                                  | MeSH descriptor: [Rehabilitation] explode all trees                                                                                                                                                                                                                                                                                                                                                                                                                                                                                                                                                                                                                                                                                                                                                                                                                                                                                                                                                                                         |
| #10                                                                                                                                                                                                                                                                                                                                                                                                                                                                                                                                                                                                                                                                                                                                                                                                                                                                                                                                                                                                                                                                                                                                                                                                                                                                                                                                                                                                                                                                 | Any MeSH descriptor with qualifier(s): [Rehabilitation - RH]                                                                                                                                                                                                                                                                                                                                                                                                                                                                                                                                                                                                                                                                                                                                                                                                                                                                                                                                                                                |
| #11                                                                                                                                                                                                                                                                                                                                                                                                                                                                                                                                                                                                                                                                                                                                                                                                                                                                                                                                                                                                                                                                                                                                                                                                                                                                                                                                                                                                                                                                 | MeSH descriptor: [Rehabilitation Centers] explode all trees                                                                                                                                                                                                                                                                                                                                                                                                                                                                                                                                                                                                                                                                                                                                                                                                                                                                                                                                                                                 |
| #12                                                                                                                                                                                                                                                                                                                                                                                                                                                                                                                                                                                                                                                                                                                                                                                                                                                                                                                                                                                                                                                                                                                                                                                                                                                                                                                                                                                                                                                                 | MeSH descriptor: [Secondary Prevention] explode all trees                                                                                                                                                                                                                                                                                                                                                                                                                                                                                                                                                                                                                                                                                                                                                                                                                                                                                                                                                                                   |
| #13                                                                                                                                                                                                                                                                                                                                                                                                                                                                                                                                                                                                                                                                                                                                                                                                                                                                                                                                                                                                                                                                                                                                                                                                                                                                                                                                                                                                                                                                 | ("rehabilitat*" or "rehab" or "cardiorehabilit*" or "secondary prevent*" or "program" or "programme" or "programs" or "programmes"):ti,ab,kw                                                                                                                                                                                                                                                                                                                                                                                                                                                                                                                                                                                                                                                                                                                                                                                                                                                                                                |
| #14                                                                                                                                                                                                                                                                                                                                                                                                                                                                                                                                                                                                                                                                                                                                                                                                                                                                                                                                                                                                                                                                                                                                                                                                                                                                                                                                                                                                                                                                 | #9 or #10 or #11 or #12 or #13                                                                                                                                                                                                                                                                                                                                                                                                                                                                                                                                                                                                                                                                                                                                                                                                                                                                                                                                                                                                              |
| #15                                                                                                                                                                                                                                                                                                                                                                                                                                                                                                                                                                                                                                                                                                                                                                                                                                                                                                                                                                                                                                                                                                                                                                                                                                                                                                                                                                                                                                                                 | ("cardiac rehabilitation"):ti,ab,kw                                                                                                                                                                                                                                                                                                                                                                                                                                                                                                                                                                                                                                                                                                                                                                                                                                                                                                                                                                                                         |
| #16                                                                                                                                                                                                                                                                                                                                                                                                                                                                                                                                                                                                                                                                                                                                                                                                                                                                                                                                                                                                                                                                                                                                                                                                                                                                                                                                                                                                                                                                 | #8 and #14                                                                                                                                                                                                                                                                                                                                                                                                                                                                                                                                                                                                                                                                                                                                                                                                                                                                                                                                                                                                                                  |
| #17                                                                                                                                                                                                                                                                                                                                                                                                                                                                                                                                                                                                                                                                                                                                                                                                                                                                                                                                                                                                                                                                                                                                                                                                                                                                                                                                                                                                                                                                 | #15 or #16                                                                                                                                                                                                                                                                                                                                                                                                                                                                                                                                                                                                                                                                                                                                                                                                                                                                                                                                                                                                                                  |
| #18                                                                                                                                                                                                                                                                                                                                                                                                                                                                                                                                                                                                                                                                                                                                                                                                                                                                                                                                                                                                                                                                                                                                                                                                                                                                                                                                                                                                                                                                 | with Cochrane Library publication date from Dec 2015 to Sep 2018                                                                                                                                                                                                                                                                                                                                                                                                                                                                                                                                                                                                                                                                                                                                                                                                                                                                                                                                                                            |
| <b>ICTRP (International Clinical Trials Registry Platform):</b> Search interface: ICTRP Search Portal ( <a href="http://apps.who.int/trialsearch/">http://apps.who.int/trialsearch/</a> ) – Date of search: Sept 4 2018                                                                                                                                                                                                                                                                                                                                                                                                                                                                                                                                                                                                                                                                                                                                                                                                                                                                                                                                                                                                                                                                                                                                                                                                                                             |                                                                                                                                                                                                                                                                                                                                                                                                                                                                                                                                                                                                                                                                                                                                                                                                                                                                                                                                                                                                                                             |
| <i>[Each line was run and exported separately, only records from Dec 2015 onwards were exported]</i>                                                                                                                                                                                                                                                                                                                                                                                                                                                                                                                                                                                                                                                                                                                                                                                                                                                                                                                                                                                                                                                                                                                                                                                                                                                                                                                                                                |                                                                                                                                                                                                                                                                                                                                                                                                                                                                                                                                                                                                                                                                                                                                                                                                                                                                                                                                                                                                                                             |
| <b>(#1)</b><br>myocardial infarct* AND rehab* OR coronary infarct* AND rehab* OR cardiac infarct* AND rehab* OR heart infarct* AND rehab* OR postmyocardial infarct* AND rehab* OR post-MI AND rehab* OR heart attack* AND rehab* OR coronary attack* AND rehab* OR cardiac attack* AND rehab* OR myocardial attack* AND rehab* OR cardiac event* AND rehab* OR coronary event* AND rehab* OR myocardial event* AND rehab* OR coronary syndrome* AND rehab* OR cardiac syndrome* AND rehab* OR myocardial syndrome* AND rehab* OR bypass grafting AND rehab* OR coronary artery bypass AND rehab* OR coronary bypass AND rehab* OR cardiac bypass AND rehab* OR coronary thromb* AND rehab* OR intracoronary thromb* AND rehab* OR coronary angioplast* AND rehab* OR intracoronary angioplast* AND rehab* OR cardiac angioplast* AND rehab* OR coronary stent* AND rehab* OR intracoronary stent* AND rehab* OR cardiac stent* AND rehab* OR coronary intervention* AND rehab* OR intracoronary intervention* AND rehab* OR cardiac intervention* AND rehab* OR coronary reperfusion* AND rehab* OR intracoronary reperfusion* AND rehab* OR cardiac reperfusion* AND rehab* OR myocardial revasculari* AND rehab* OR coronary revasculari* AND rehab* OR cardiac revasculari* AND rehab* OR myocardial stunning AND rehab* OR cardiac stunning AND rehab* OR AMI AND rehab* OR STEMI AND rehab* OR NSTEMI AND rehab* OR PCI AND rehab* OR CABG AND rehab* OR PTCA |                                                                                                                                                                                                                                                                                                                                                                                                                                                                                                                                                                                                                                                                                                                                                                                                                                                                                                                                                                                                                                             |

AND rehab\* OR unstable angina AND rehab\*

**(#2)**

myocardial infarct\* AND program\* OR coronary infarct\* AND program\* OR cardiac infarct\* AND program\* OR heart infarct\* AND program\* OR postmyocardial infarct\* AND program\* OR post-MI AND program\* OR heart attack\* AND program\* OR coronary attack\* AND program\* OR cardiac attack\* AND program\* OR myocardial attack\* AND program\* OR cardiac event\* AND program\* OR coronary event\* AND program\* OR myocardial event\* AND program\* OR coronary syndrome\* AND program\* OR cardiac syndrome\* AND program\* OR myocardial syndrome\* AND program\* OR bypass grafting AND program\* OR coronary artery bypass AND program\* OR coronary bypass AND program\* OR cardiac bypass AND program\* OR coronary thromb\* AND program\* OR intracoronary thromb\* AND program\* OR coronary angioplast\* AND program\* OR intracoronary angioplast\* AND program\*

**(#3)**

cardiac angioplast\* AND program\* OR coronary stent\* AND program\* OR intracoronary stent\* AND program\* OR cardiac stent\* AND program\* OR coronary intervention\* AND program\* OR intracoronary intervention\* AND program\* OR cardiac intervention\* AND program\* OR coronary reperfusion\* AND program\* OR intracoronary reperfusion\* AND program\* OR cardiac reperfusion\* AND program\* OR myocardial revasculari\* AND program\* OR coronary revasculari\* AND program\* OR cardiac revasculari\* AND program\* OR myocardial stunning AND program\* OR cardiac stunning AND program\* OR AMI AND program\* OR STEMI AND program\* OR NSTEMI AND program\* OR PCI AND program\* OR CABG AND program\* OR PTCA AND program\* OR unstable angina AND program\*

**(#4)**

cardiac rehabilitation

**Footnotes:**

**Cochrane HSSS filter:** Cochrane Highly Sensitive Search Strategy for identifying randomized trials in MEDLINE: sensitivity-maximizing version, 2008 revision (available at: <http://handbook.cochrane.org/>)

**Own filter:** Own cohort study filter based on two (unvalidated) search filters: BMJ Cohort Filter (available at: <http://clinicalevidence.bmj.com/x/set/static/ebm/learn/665076.html>) and University of Texas Cohort Filter (available at: [http://libguides.sph.uth.tmc.edu/ovid\\_medline\\_filters](http://libguides.sph.uth.tmc.edu/ovid_medline_filters))

**Wong 2006 Embase filter:** Wong SS, Wilczynski NL, Haynes RB. [Developing optimal search strategies for detecting clinically sound treatment studies in EMBASE.](#) *Journal of the Medical Library Association* 2006;94(1):41-7.

**Table SM 3a: Studies selected for quantitative analysis (CROS I, search until Dec 2015, and CROS II, search until Sep 2018); baseline study characteristics and overall results**

| Study<br>Publication year<br>Country             | Study<br>design | Population (P):<br>a. Data sources<br>b. Number of included participants (N)<br>c. Index events<br>d. Inclusion period<br>e. Other inclusion criteria and characteristics<br>f. Age (y, mean±SD or as stated)<br>g. Gender (male, %)                                          | Intervention (I):<br>a. Number (n)<br>b. Structured and multi-component CR (SMC-CR)?<br>c. Start after index event<br>d. Duration (time period and/or total number of CR sessions)<br>e. Frequency (CR exercise sessions per wk)<br>f. CR-setting | Control (C):<br>a. Number (n)<br>b. Treatment, characteristics | Outcome (O):<br>a. Follow-up period<br>b. Outcomes according to the CROS criteria (numbers according to table 1)<br>c. Other outcomes                                                            | Overall results, with respect to endpoints 1–10 as defined by CROS. Definitions are given at the end of the table*                                                                                           | Remarks                                                                                                                                 |
|--------------------------------------------------|-----------------|-------------------------------------------------------------------------------------------------------------------------------------------------------------------------------------------------------------------------------------------------------------------------------|---------------------------------------------------------------------------------------------------------------------------------------------------------------------------------------------------------------------------------------------------|----------------------------------------------------------------|--------------------------------------------------------------------------------------------------------------------------------------------------------------------------------------------------|--------------------------------------------------------------------------------------------------------------------------------------------------------------------------------------------------------------|-----------------------------------------------------------------------------------------------------------------------------------------|
| (1) Boulay P et al. 2004 <sup>1</sup><br>Canada  | p/r<br>CCT      | a. Institutional<br>b. n=128<br>c. AMI<br>d. probably after 1995<br>e. aged ≤ 75 y, EF > 35%, first ischemic event<br>f. 53.8±9.9 (CR+, phase II)<br>54.3±10.3 (CR+, phase II+III)<br>56.5±9.7 (no CR)<br>g. 86.5 (CR+, phase II)<br>78.4 (CR+, phase II+III)<br>77.8 (no CR) | a. n=37 (phase II)<br>n=37 (phase II+III)<br>b. SMC-CR<br>c. ≤ 1 wk after discharge (phase II)<br>d. 12 wk (phase II) at least 9 mo (phase III)<br>e. n=2<br>f. outpatient (phase II, III)                                                        | a. n=54<br>b. UC, AMI within 1 y before start of the study     | a. 1 y post AMI<br>b. (4), (7)<br>c. number of emergency room visits for chest pain or suspicion for cardiac-related symptoms, recurrences of fatal and non-fatal AMI, duration of hospital stay | <i>Event rate (%)</i><br><u>Endpoint 7:</u><br>no CR: 37<br>CR+ phase II: 29.7<br>CR+ phase II+III: 16.2<br>p<0.05<br><u>Endpoint 4:</u><br>Control: 5.6<br>CR phase II: 0<br>CR phase II+III: 2.7<br>p<0.05 | - different time periods for CR and control group (prospective and retrospective evaluation)<br>- inclusion period confirmed by authors |
| (2) Norris CM et al. 2004 <sup>2</sup><br>Canada | rCCS            | a. Data linkage: Alberta Provincial Project for Outcome Assessment in Coronary Heart Disease (APPROACH) with the Northern Alberta Cardiac Rehabilitation Program (NACRP)                                                                                                      | a. n=1,470<br>b. SMC-CR<br>c. 88.65±78.09 d Median 54 d (information by author)<br>d. 12 wk (information by author)<br>e. n=2–3 (information by                                                                                                   | a. n=3,611<br>b. UC                                            | a. 1, 2, 6 y<br>b. (1)<br>c. –                                                                                                                                                                   | <i>HR (95% CI)</i><br><u>Endpoint 1:</u><br>0.79 (0.64–0.98)<br>in favor to CR+<br>p=0.036                                                                                                                   | - description of CR obtained by author                                                                                                  |

|                                               |      |                                                                                                                                                                                                                                                                    |                                                                                                                                                                                                                                                |                                                                      |                                                                                                                              |                                                                                                                                                                    |                                                                                                                                  |
|-----------------------------------------------|------|--------------------------------------------------------------------------------------------------------------------------------------------------------------------------------------------------------------------------------------------------------------------|------------------------------------------------------------------------------------------------------------------------------------------------------------------------------------------------------------------------------------------------|----------------------------------------------------------------------|------------------------------------------------------------------------------------------------------------------------------|--------------------------------------------------------------------------------------------------------------------------------------------------------------------|----------------------------------------------------------------------------------------------------------------------------------|
|                                               |      | b. n=5,081<br>c. mixed population: catheterization for AP, ACS, followed by PCI, CABG or medical therapy<br>d. 01/1995–12/1999<br>e. ≥ 6 mo survival after index event<br>f. 60.8 (CR+)<br>64.2 (no CR)<br>g. 80.7 (CR+)<br>75.2 (no CR)                           | author)<br>f. outpatient                                                                                                                                                                                                                       |                                                                      |                                                                                                                              |                                                                                                                                                                    |                                                                                                                                  |
| (3) Kutner NG et al. 2006 <sup>3</sup><br>USA | rCCS | a. United States Renal Data System (USRDS)<br>b. n=6,215<br>n=1,855 aged < 65y<br>n=4,353 aged > 65y<br>n=7 lost at follow-up<br>c. CABG<br>d. 01/01/1998–31/12/2002<br>e. HD patients surviving ≥ 90 days post-surgery<br>f. 67.9±10.3 (total)<br>g. 61.4 (total) | a. n=193 (10.4 % of the population < 65y)<br>n=431 (9.9 % of the population > 65y)<br>b. not clear, includes physical exercise supervised or not supervised<br>c. 88±100 d<br>d. total: 36 CR sessions within 12 wk<br>e. n=3<br>f. outpatient | a. n=5,581<br>b. UC                                                  | a. up to 6 y<br>b. (1),(2)<br>c. –                                                                                           | <i>HR (95% CI)</i><br><u>Endpoint 1:</u><br>0.65 (0.56–0.76)<br>in favor to CR+<br>p<0.001<br><u>Endpoint 2:</u><br>0.64 (0.51–0.81)<br>in favor to CR+<br>p<0.001 | NOS 7<br><br>description of CR incomplete multi component CR as defined by CROS not witnessed<br>- author contacted but no reply |
| (4) Milani RV et al. 2007 <sup>4</sup><br>USA | rCCS | a. Ochsner Medical Center, New Orleans<br>b. n=701<br>c. coronary events, including AMI (39 %), CABG (35 %), PCI (44%)<br>d. 01/2000–07/2005<br>e. including depressive patients                                                                                   | a. n=522<br>b. SMC-CR<br>c. 2–6 wk after index event<br>d. 12 wk, total: 36 sessions<br>e. n=3<br>f. outpatient                                                                                                                                | a. n=179<br>b. UC after non completion of 2 wks<br>CR (< 5 sessions) | a. 1,296 ± 551 d (range: 109–2,188 d)<br>b. (1)<br>c. Cardiovascular risk factors, psychological parameters, quality of life | <i>Event rate (% CR+/no CR)</i><br><u>Endpoint 1:</u><br>8/30<br>p=0.0005 (subgroup of depressed patients)                                                         | - no mortality data from the whole study group (with and without depression) available<br>- contact to author not successful     |



|                                                    |      |                                                                                                                                                                                                                                                                                                                                                                                                                                 |                                                                                                                                                                                 |                                                                                                                                          |                                                                                                                                                |                                                                                                                                                                                                                                                                                                                                                        |                                           |
|----------------------------------------------------|------|---------------------------------------------------------------------------------------------------------------------------------------------------------------------------------------------------------------------------------------------------------------------------------------------------------------------------------------------------------------------------------------------------------------------------------|---------------------------------------------------------------------------------------------------------------------------------------------------------------------------------|------------------------------------------------------------------------------------------------------------------------------------------|------------------------------------------------------------------------------------------------------------------------------------------------|--------------------------------------------------------------------------------------------------------------------------------------------------------------------------------------------------------------------------------------------------------------------------------------------------------------------------------------------------------|-------------------------------------------|
|                                                    |      | f. 64±11 (total)<br>g. 72 (total)                                                                                                                                                                                                                                                                                                                                                                                               |                                                                                                                                                                                 |                                                                                                                                          |                                                                                                                                                |                                                                                                                                                                                                                                                                                                                                                        |                                           |
| (5) Nielsen KM et al. 2008 <sup>5</sup><br>Denmark | rCCS | a. Coronary care unit at Aarhus Sygehus, Municipality of Aarhus cohort, Denmark, aged 30–69 y<br>b. n=200<br>c. AMI<br>d. 01/04/2000–31/03/2002<br>e. ≥ 30 d survival after AMI<br>f. Mdn 59.8 (CR+) Mdn 59.7 (no CR)<br>g. 71.5 (CR+), na (no CR)                                                                                                                                                                              | a. n=145<br>b. SMC-CR<br>c. 1–2 wk after hospital admission<br>d. 6 wk (phase II)<br>e. n=2 exercise sessions + education, life style and psychosocial support<br>f. outpatient | a. n=55<br>b. CR non-attenders, UC                                                                                                       | a. 1 and 2 y<br>b. (1), (4)<br>c. –                                                                                                            | <i>Event rate (% CR+/no CR)</i><br><u>Endpoint 1 after 1y:</u> 2.1/14.5, p=0.001<br><u>Endpoint 1 after 2y:</u> 2.8/21.8, p=0.0001<br><u>Endpoint 4 after 1y:</u> 22.1/10.9, p=0.07                                                                                                                                                                    |                                           |
| (6) Alter DA et al. 2009 <sup>6</sup><br>Canada    | rCCS | a. Data linkage: Toronto Rehabilitation Institutes, Clinical Registry (UNIX platform), Canadian Institute of Health Information Discharge Abstract Database (DAD), Ontario Health Insurance Plan, and Registered Persons Database<br>b. n=4,084<br>c. primary index event ACS (97.7 %), CHF and others (2.3 %)<br>d. 06/01/1999–10/12/2003<br>e. death or readmissions within 1 y after index event were excluded<br>f. 59.4±10 | a. n=2,042<br>b. SMC-CR<br>c. 89 d average<br>d. 12 mo, total: 26–36 sessions<br>e. n=1 on-site exercise session + monitored home-based sessions and education<br>f. outpatient | a. n=2,042<br>b. CR non-attenders matched for index events, medical history, age, gender, socio-economic status, geographical region; UC | a. 2 y + 5.2 y (mean) (4.0–6.6) y<br>b. (1) (ITT analysis)<br>c. effect of CR in various subgroups; effect of CR completion and non-completion | <i>HR (95% CI)</i><br><u>Endpoint 1:</u> total: 0.47 (0.32–0.68); p<0.001<br>≤65y: 0.59 (0.35–0.97); p=0.04<br>≥66y: 0.31 (0.17–0.56); p<0.001<br>high risk: 0.57 (0.36–0.90); p=0.02<br>low risk: 0.57 (0.17–1.95); p=0.31<br>CR non completers: 0.71 (0.29–1.71), p=0.41<br>CR completers: 0.28 (0.13–0.60), p<0.001 (below 1.00 is in favor to CR+) | - follow-up started 1 y after index event |

|                                                  |      |                                                                                                                                                                                                                                                                                                                                                                                                                                          |                                                                                                                                                                                                   |                                                                                           |                                                                                        |                                                                                                                                                                                                                                                                                |                                                                                                                                                                                                                                                                                                                                                                                                                        |  |
|--------------------------------------------------|------|------------------------------------------------------------------------------------------------------------------------------------------------------------------------------------------------------------------------------------------------------------------------------------------------------------------------------------------------------------------------------------------------------------------------------------------|---------------------------------------------------------------------------------------------------------------------------------------------------------------------------------------------------|-------------------------------------------------------------------------------------------|----------------------------------------------------------------------------------------|--------------------------------------------------------------------------------------------------------------------------------------------------------------------------------------------------------------------------------------------------------------------------------|------------------------------------------------------------------------------------------------------------------------------------------------------------------------------------------------------------------------------------------------------------------------------------------------------------------------------------------------------------------------------------------------------------------------|--|
|                                                  |      |                                                                                                                                                                                                                                                                                                                                                                                                                                          |                                                                                                                                                                                                   |                                                                                           |                                                                                        |                                                                                                                                                                                                                                                                                |                                                                                                                                                                                                                                                                                                                                                                                                                        |  |
|                                                  |      | g. 87.4                                                                                                                                                                                                                                                                                                                                                                                                                                  |                                                                                                                                                                                                   |                                                                                           |                                                                                        |                                                                                                                                                                                                                                                                                |                                                                                                                                                                                                                                                                                                                                                                                                                        |  |
| (7) Hansen D et al. 2009 <sup>7</sup><br>Belgium | pCCS | <p>a. hospital files and general practitioners</p> <p>b. n=238</p> <p>c. successful CABG</p> <p>d. 01/1998–10/2002</p> <p>e. blanking period: 4 wk post CABG, exclusion: symptomatic patients, co-morbidity of prognostic relevance</p> <p>f. 65.0± 9.0 (CR+) 66.2±8.3 (no CR)</p> <p>g. 69.8 (CR+) 67.7 (no CR)</p>                                                                                                                     | <p>a. n=149</p> <p>b. SMC-CR</p> <p>c. 1–2 wk after discharge</p> <p>d. 3 mo, total ≥ 24 sessions</p> <p>e. n=3 + psychological/educational interventions</p> <p>f. outpatient</p>                | <p>a. n=89</p> <p>b. UC</p>                                                               | <p>a. 2 y</p> <p>b. (1), (4), (8), (10)</p> <p>c. –</p>                                | <p><i>Event rate (% CR+/no CR)</i></p> <p><u>Endpoint 1:</u> 0.7/5.4, p&lt;0.05</p> <p><u>Endpoint 4:</u> 0.0/3.2, p&lt;0.05</p> <p><u>Endpoint 8:</u> with PCI: 4.0/6.5</p> <p>With CABG: 0.0/0.7</p> <p><u>Endpoint 10:</u> 4.7/14.0</p>                                     | <p>NOS 6</p> <p>potential selection bias by using 2 medical centers offering CR or not - inclusion period by information from the author</p>                                                                                                                                                                                                                                                                           |  |
| (8) Suaya JA et al. 2009 <sup>8</sup><br>USA     | rCCS | <p>a. Data linkage: Medicare’s National Claims History File, Medicare’s master enrollment database, American Hospital Association</p> <p>b. n=601,099 n=70,040 matched pairs</p> <p>c. mixed population: AMI (37.1 %), CABG (35.4 %), PCI (21.0 %), others</p> <p>d. through 1997</p> <p>e. age ≥ 65 y, hospital stay ≤ 30d, surviving ≥ 30 d after discharge</p> <p>f. 65–74 y: 65.2 % 75–84 Y: 32.7 % ≥ 85 y: 2.1 %</p> <p>a. 63.6</p> | <p>a. n=70,040</p> <p>b. SMC-CR</p> <p>c. not reported</p> <p>d. average: 24 CR sessions low CR users: 1–24 sessions high CR users: ≥ 25 sessions</p> <p>e. not reported</p> <p>f. outpatient</p> | <p>a. n=70,040</p> <p>b. Nonusers of CR matched on AMI, PCI and CABG and demographics</p> | <p>a. 1 + 5 y after discharge from index hospitalization</p> <p>b. (1)</p> <p>c. –</p> | <p><i>Event rate (% CR+/no CR)</i></p> <p><u>Endpoint 1 after 1y:</u> Propensity-based matching: 2.2/5.3 Regression modelling: 4.8/10.9</p> <p><u>Endpoint 1 after 5y:</u> Propensity-based matching: 16.3/24.6 Regression modelling: 28.1/38.0</p> <p>p&lt;0.0001 for all</p> | <p>- description of CR is limited to the “use of CR services defined by Medicare reimbursement for at least 1 CR session within 1 y of follow-up”</p> <p>- CR content is not reported in publication but known as multi-component through official Medicare sites: <a href="http://www.massgeneral.org">www.massgeneral.org</a>; <a href="https://www.medicare.gov/cardiac-">https://www.medicare.gov/cardiac-</a></p> |  |

| (9) Jünger C et al. 2010 <sup>9</sup><br>Germany | rCCS | <p>a. Acute Coronary Syndrome Registry (ACOS), including 155 hospitals in Germany</p> <p>b. STEMI, n=2,432<br/>NSTEMI, n=2,115</p> <p>c. STEMI, NSTEMI</p> <p>d. 06/2000–12/2002</p> <p>e. alive at hospital discharge</p> <p>f. Mdn:<br/>STEMI 63.2 (CR+)<br/>70.0 (no CR)<br/>NSTEMI 66.3 (CR+)<br/>71.3 (no CR)</p> <p>g. STEMI<br/>73.6 (CR+); 70.0 (no CR)<br/>NSTEMI<br/>71.5 (CR+); 63.6 (no CR)</p> | <p>a. STEMI n=1,649<br/>NSTEMI n=1,107</p> <p>b. SMC-CR</p> <p>c. ≤ 2 wk after hospital discharge</p> <p>d. 3–4 wk</p> <p>e. ≥ 5 exercise sessions per wk + education, motivation, psychosocial support</p> <p>f. Inpatient</p> | <p>a. STEMI n=783<br/>NSTEMI n=1,008</p> <p>b. Usual care (General practitioner, control by cardiologists)</p> | <p>a. 1 y</p> <p>b. (1), (3), (10)</p> <p>c. –</p>               | <p><i>OR (95% CI)</i></p> <p><u>Endpoint 1:</u><br/>STEMI: 0.41 (0.28–0.60)<br/>NSTEMI: 0.53 (0.38–0.76)</p> <p><u>Endpoint 3:</u><br/>STEMI: 0.66 (0.49–0.89)<br/>NSTEMI: 0.73 (0.55–0.98)</p> <p><u>Endpoint 10:</u><br/>STEMI: 0.58 (0.42–0.79)<br/>NSTEMI: 0.71(0.53–0.97)<br/>p&lt;0.001 for all calculations</p> | <p>rehab-<br/>programs.html</p> <ul style="list-style-type: none"> <li>- CR controlled by German pension funds; the numbers of exercise sessions represent a minimum</li> <li>- Evaluation of deceased patients: retrospective questionnaires and/or telephone calls for assessment of CR-participation with help of relatives, not verified by medical records</li> <li>- high risk of selection bias</li> </ul> |  |
|--------------------------------------------------|------|-------------------------------------------------------------------------------------------------------------------------------------------------------------------------------------------------------------------------------------------------------------------------------------------------------------------------------------------------------------------------------------------------------------|---------------------------------------------------------------------------------------------------------------------------------------------------------------------------------------------------------------------------------|----------------------------------------------------------------------------------------------------------------|------------------------------------------------------------------|------------------------------------------------------------------------------------------------------------------------------------------------------------------------------------------------------------------------------------------------------------------------------------------------------------------------|-------------------------------------------------------------------------------------------------------------------------------------------------------------------------------------------------------------------------------------------------------------------------------------------------------------------------------------------------------------------------------------------------------------------|--|
| (10) Goel K et al. 2011 <sup>10</sup><br>USA     | rCCS | <p>a. Mayo Clinic PCI registry (Rochester area, Olmsted County) + database of the Mayo Clinic CR program</p> <p>b. n=2,395, n=719 matched pairs</p> <p>c. PCI (elective, urgent or emergency due to ACS)</p> <p>d. 01/01/1994-30/06/2008</p> <p>e. –</p> <p>f. 62.5±11.7 (CR+)<br/>66.8±13.5 (no CR)</p>                                                                                                    | <p>a. n=964 (entire cohort) n=719 (matched pairs)</p> <p>b. SMC-CR</p> <p>c. within 3 mo after index event</p> <p>d. total: Mdn 13 sessions</p> <p>e. not reported</p> <p>f. outpatient</p>                                     | <p>a. n=1,431 (entire cohort) n=719 (matched pairs)</p> <p>b. UC</p>                                           | <p>a. Mdn 6.3 y</p> <p>b. (1),(2),(4), (8), (10)</p> <p>c. –</p> | <p><i>HR (95% CI)</i></p> <p>Propensity score stratification:<br/><u>Endpoint 1:</u><br/>0.53 (0.42–0.67)<br/>p&lt;0.001</p> <p><u>Endpoint 2:</u><br/>0.61(0.41–0.91)<br/>p&lt;0.016</p> <p><u>Endpoint 4:</u><br/>1.07(0.85–1.36)<br/>p&lt;0.56</p> <p><u>Endpoint 8:</u></p>                                        | <ul style="list-style-type: none"> <li>- study includes a small part of patients in 1994;</li> <li>- mixed population including stable CAD patients</li> <li>- no detailed description of CR, but SMC-CR confirmed by author</li> <li>- per definition in the study, CR could</li> </ul>                                                                                                                          |  |

|                                                  |      |                                                                                                                                                                                                                         |                                                                                                                                                                  |                  |                                       |  |                           |                                                                                                                                                                                                                                                                                                                                 |                                                                                                                                                                                                               |
|--------------------------------------------------|------|-------------------------------------------------------------------------------------------------------------------------------------------------------------------------------------------------------------------------|------------------------------------------------------------------------------------------------------------------------------------------------------------------|------------------|---------------------------------------|--|---------------------------|---------------------------------------------------------------------------------------------------------------------------------------------------------------------------------------------------------------------------------------------------------------------------------------------------------------------------------|---------------------------------------------------------------------------------------------------------------------------------------------------------------------------------------------------------------|
|                                                  |      |                                                                                                                                                                                                                         |                                                                                                                                                                  |                  |                                       |  | g. 72 (CR+)<br>66 (no CR) | 1.06(0.90–1.25)<br>p=0.47<br><u>Endpoint 10: death,</u><br><u>AMI, PCI, CABG:</u><br>0.85(0.74–0.98)<br>p=0.022                                                                                                                                                                                                                 | be of low volume<br>- “repeat PCI/CABG”<br>as calculated in the<br>study was regarded<br>as CROS endpoint<br>number 8                                                                                         |
|                                                  |      |                                                                                                                                                                                                                         |                                                                                                                                                                  |                  |                                       |  |                           | Matched groups<br>analysis:<br><u>Endpoint 1:</u><br>0.54 (0.41–0.71)<br>p<0.001<br><u>Endpoint 2:</u><br>0.69(0.44–1.07)<br>p=0.095<br><u>Endpoint 4:</u><br>1.11(0.84–1.45)<br>p=0.47<br><u>Endpoint 8:</u><br>1.16(0.96–1.39)<br>p=0.13<br><u>Endpoint 10: death,</u><br><u>AMI, PCI, CABG:</u><br>0.92(0.78–1.07)<br>p=0.28 |                                                                                                                                                                                                               |
| (11) Kim C et al.<br>2011 <sup>11</sup><br>Korea | pCCS | a. Sanggye Paik Hospital,<br>Seoul, Korea<br>b. n=141<br>c. AMI<br>d. 01/2006–12/2007<br>e. PCI or CABG, exclusion:<br>stroke, cancer, neuro-<br>musculoskeletal<br>symptoms<br>f. 61.9±10.7 (CR+)<br>64.5±12.8 (no CR) | a. n=69<br>b. SMC-CR<br>c. not reported<br>d. 6–8 wk, hospital<br>monitored, followed by<br>monitored home based<br>exercise<br>e. not reported<br>f. outpatient | a. n=72<br>b. UC | a. 1 y<br>b. (1),(6),(8),(10)<br>c. – |  |                           | <i>Event rate (% CR+/no<br/>CR)</i><br><u>Endpoint 1:</u><br>1.4/1.04; p=0.95<br><u>Endpoint 6:</u><br>0.0/3.0; p=0.49<br><u>Endpoint 8:</u><br>6.0/10.0; p=0.53<br><u>Endpoint 10:</u><br>10.0/24.0; p=0.033                                                                                                                   | - endpoint (10) was<br>defined as<br>“recurrence”,<br>which was a<br>composite of re-<br>hospitalization, re-<br>ACS, coronary<br>angiography, PCI,<br>CABG, and death<br>- start after index<br>event and CR |

|                                                     |      |                                                                                                                                                                                                                                                                                                   |                                                                                                                                                                         |                                                                                |                                                                                                      |                                                                                                                                                                                                                                                                |                                                                                                                                                                                                                                                                                                                                                                                                              |                           |                                                                       |
|-----------------------------------------------------|------|---------------------------------------------------------------------------------------------------------------------------------------------------------------------------------------------------------------------------------------------------------------------------------------------------|-------------------------------------------------------------------------------------------------------------------------------------------------------------------------|--------------------------------------------------------------------------------|------------------------------------------------------------------------------------------------------|----------------------------------------------------------------------------------------------------------------------------------------------------------------------------------------------------------------------------------------------------------------|--------------------------------------------------------------------------------------------------------------------------------------------------------------------------------------------------------------------------------------------------------------------------------------------------------------------------------------------------------------------------------------------------------------|---------------------------|-----------------------------------------------------------------------|
|                                                     |      |                                                                                                                                                                                                                                                                                                   |                                                                                                                                                                         |                                                                                |                                                                                                      |                                                                                                                                                                                                                                                                |                                                                                                                                                                                                                                                                                                                                                                                                              | g. 71 (CR+)<br>83 (no CR) | exercise frequency not reported<br>- contact to author not successful |
| (12) Schwaab B et al. 2011 <sup>12</sup><br>Germany | rCCS | a. secondary selection of participants from the TeleGuard trial,(40)<br>b. n=1,474<br>c. mixed population (AMI, stable AP, elective or emergency PCI, CABG)<br>d. 2001–2004<br>e. participation in the TeleGuard trial<br>f. 64.1±9.6 (CR+)<br>62.2±10.3 (no CR)<br>g. 73.7 (CR+)<br>76.9 (no CR) | a. n=794<br>b. SMC-CR<br>c. ≤2 wk after hospital discharge<br>d. 3–4 wk<br>e. > 5 exercise sessions per wk + education, psychosocial support<br>f. inpatient (majority) | a. n=679<br>b. UC                                                              | a. 1 y upon CR start<br>b. Primary endpoint: (10)<br>Secondary endpoints: (1), (4), (6), (8)<br>c. – | <i>Event rate (% CR+/no CR)</i><br><u>Endpoint 1:</u><br>2.1/2.4; p=0.014<br><u>Endpoint 4:</u><br>1.8/3.8; p=0.015<br><u>Endpoint 6:</u><br>31.8/38.0; p=0.013<br><i>OR (95% CI)</i><br><u>Endpoint 10:</u><br>0.73 (0.59–0.91)<br>p=0.005<br>in favor to CR+ | - Exercise frequency is not reported but CR follows regulations of German pension funds (numbers represent a minimum as confirmed by author)<br>- Self-reported CR-participation, not verified<br>- potential selection bias due to 56.4% CABG patients in the CR+ group vs only 27.9 % CABG patients in the control group (“no CR”)<br>- suspicion of underrepresentation of NSTEMI-patients in both groups |                           |                                                                       |
| (13) Martin BJ et al. 2012 <sup>13</sup><br>Canada  | pCCS | a. data linkage: Alberta Provincial Project for Outcomes Assessment in Coronary Heart Disease (APPROACH), Cardiac                                                                                                                                                                                 | a. n=2,900 (entire population)<br>n=2,256 (matched pairs)<br>b. SMC-CR                                                                                                  | a. n=2,986 (entire population)<br>n=2,256 (matched pairs)<br>b. no CR and non- | a. Mdn: 5.37, up to 14 y<br>b. (1),(6),(7)<br>c. Emergency room visits without                       | <i>HR (95% CI)</i><br><u>Endpoint 1:</u><br>Adjusted:<br>0.59 (0.49–0.70)<br>Propensity matched:                                                                                                                                                               | - Information on CR content not included in publication but obtained from                                                                                                                                                                                                                                                                                                                                    |                           |                                                                       |

|                                                          |      |                                                                                                                                                                                                                                                                                                                                  |                                                                                                                                                                                                                   |                           |                                                                                               |                                                                                                                                                                                                                                                                                            |                                                                                                                                                                                     |
|----------------------------------------------------------|------|----------------------------------------------------------------------------------------------------------------------------------------------------------------------------------------------------------------------------------------------------------------------------------------------------------------------------------|-------------------------------------------------------------------------------------------------------------------------------------------------------------------------------------------------------------------|---------------------------|-----------------------------------------------------------------------------------------------|--------------------------------------------------------------------------------------------------------------------------------------------------------------------------------------------------------------------------------------------------------------------------------------------|-------------------------------------------------------------------------------------------------------------------------------------------------------------------------------------|
|                                                          |      | Wellness Institute of Calgary (CWIC) inpatient and emergency databases; Canada<br>b. n=5,886<br>c. population (ACS +stable AP, others)<br>d. 01/07/1996–31/01/2009<br>e. exclusion: aged < 18 y, no official health number, surviving < 6 mo after index event<br>f. 60.1 (CR+)<br>61.1 (no CR)<br>g. 83.8 (CR+)<br>74.7 (no CR) | c. 105.8 days (mean from referral to CR enrolment)<br>d. 12 wk, total: 21.9±10.2 sessions<br>e. n=2–3 supervised exercise session per wk + resistance training + non supervised sessions at home<br>f. outpatient | completers of CR<br>c. UC | hospitalization                                                                               | 0.67 (0.54–0.81)<br><u>Endpoint 6:</u><br>CR+ completion: 0.77 (0.71–0.84)<br>CR non completers: 1.30 (1.13–1.49)<br><u>Endpoint 7:</u><br>CR+ completion: 0.68 (0.55–0.83)<br>CR non completers: 0.87 (0.64–1.19)                                                                         | author                                                                                                                                                                              |
| (14) West RR et al. 2012 <sup>14</sup><br>United Kingdom | prCT | a. multi-center based<br>b. n=1,813<br>c. AMI<br>d. 08/1997–04/2000<br>e. discharged home within 28 d<br>f. 64.2±11.2 (CR+)<br>64.7±10.9 (no CR)<br>g. 72.6 (CR+)<br>74.4 (no CR)                                                                                                                                                | a. n=903<br>b. SMC-CR<br>c. not reported<br>d. mean: 20 h within 6–8 wk<br>e. n =1–2 per wk<br>f. outpatient                                                                                                      | a. n=910<br>b. UC         | a. 1 y, 2y until 7–9 y<br>b. (1),(4), (5), (7), (10)<br>c. quality of life (SF36), life style | <i>RR (95% CI)</i><br><u>Endpoint 1 after 1y:</u> 1.16 (0.79–1.69)<br><u>Endpoint 1 after 2y:</u> 0.98 (0.74–1.30)<br><u>Endpoint 1 after 7–9 y:</u> 0.99 (0.85–1.15)<br><u>Endpoint 10 after 1 y:</u> 0.96 (0.88–1.07)<br><u>Endpoints 4, 5, 7:</u> no differences between CR and control | - high risk of under-powering<br>- early closure of enrollment due to limited funding: from an anticipated total of 6,000 patients only 1,813 patients were included into the study |
| (15) Beauchamp A et al. 2013 <sup>15</sup><br>Australia  | rCCS | a. a sample of participants of an earlier study(42)<br>b. n=544<br>c. mixed population: AMI, CABG and PCI<br>d. 1996–1997                                                                                                                                                                                                        | a. n= 281<br>b. SMC-CR<br>c. not reported<br>d. total: 6–12 CR sessions (each session: 1 h exercise + 1 h                                                                                                         | a. n=263<br>b. UC         | a. 14 y<br>b. (1)<br>c. –                                                                     | <i>HR (95% CI)</i><br><u>Endpoint 1:</u> 1.58 (1.16–2.15)<br>p=0.004<br>in favor to CR +                                                                                                                                                                                                   | - mortality was ascertained through linkage to the Australian National Death Index                                                                                                  |

|                                                      |      |                                                                                                                                                                                                                                                                                                         |                                                                                                                                                                                                            |                                          |                                                                           |                                                                                                                                             |                                                                                                                                             |                                                                                                              |
|------------------------------------------------------|------|---------------------------------------------------------------------------------------------------------------------------------------------------------------------------------------------------------------------------------------------------------------------------------------------------------|------------------------------------------------------------------------------------------------------------------------------------------------------------------------------------------------------------|------------------------------------------|---------------------------------------------------------------------------|---------------------------------------------------------------------------------------------------------------------------------------------|---------------------------------------------------------------------------------------------------------------------------------------------|--------------------------------------------------------------------------------------------------------------|
|                                                      |      | e. survival within 1 y after index event<br>f. 60.9±10.1 (CR+)<br>64.2±12.3 (no CR)<br>g. 77 (CR+)<br>69 (no CR)                                                                                                                                                                                        | education)<br>e. not reported<br>f. outpatient                                                                                                                                                             |                                          |                                                                           |                                                                                                                                             |                                                                                                                                             | - no external validation of clinical characteristics<br>- CR duration and frequency of sessions not reported |
| (16) Lee HY et al. 2013 <sup>16</sup><br>Korea       | pCCS | a. Sanggye Paik Hospital, Seoul, Korea<br>b. n=74<br>c. AMI after successful PCI with drug-eluting stent<br>d. 11/2007–05/2009<br>e. Age 50–75 y excluded if prior revascularization, cardiovascular or other comorbidities-<br>f. 58.8±10.8 (CR+)<br>60.3±8.7 (no CR)<br>g. 81.8 (CR+)<br>83.8 (no CR) | a. n=37<br>b. not reported<br>c. within 4 wk<br>d. 6 wk including structured and supervised exercise, followed by community-based and self-managed exercise (total 9 mo)<br>e. n=3 per wk<br>f. outpatient | a. n=37<br>(similar age as CR+)<br>b. UC | a. 9 mo<br>b. (2),(4), (10)<br>c. coronary restenosis as primary endpoint | <i>Event quantity (n CR+/no CR)</i><br><u>Endpoint 2:</u><br>0/1, p=0.33<br><u>Endpoint 4:</u><br>0/0<br><u>Endpoint 10:</u><br>1/6, p=0.20 | - Multi-component CR not reported in detail<br>- small numbers of study participants                                                        |                                                                                                              |
| (17) Marzolini S et al. 2013 <sup>17</sup><br>Canada | pCCS | a. secondary analysis of CR CARE survey comparing CR-participation by referral strategy (medically stable patients from 11 hospitals between Windsor, Sudbury, Ottawa, Ontario);(45) linkage to medical charts and administrative data bases<br>b. n=851<br>c. ACS<br>d. 2006-2008                      | a. n=424<br>b. SMC<br>c. data not available<br>d. data not available<br>e. data not available<br>f. outpatient                                                                                             | a. n=427<br>b. UC                        | a. Mdn: 2.7 y<br>b. (1), (10)<br>c. –                                     | <i>HR (95% CI)</i><br><u>Endpoint 1:</u><br>3.91 (1.23–12.36)<br>in favor to CR+<br><u>Endpoint 10:</u><br>no significant differences       | - self-reported CR-participation<br>- information on CR-content given by author, data on CR start, duration and intensity are not available |                                                                                                              |

|                                                          |      |                                                                                                                                                                                                                                                                                                                                   |                                                                                                                                                                                                                                |                   |                                        |                                                                                                               |                                                                                                                                                                                                            |  |
|----------------------------------------------------------|------|-----------------------------------------------------------------------------------------------------------------------------------------------------------------------------------------------------------------------------------------------------------------------------------------------------------------------------------|--------------------------------------------------------------------------------------------------------------------------------------------------------------------------------------------------------------------------------|-------------------|----------------------------------------|---------------------------------------------------------------------------------------------------------------|------------------------------------------------------------------------------------------------------------------------------------------------------------------------------------------------------------|--|
|                                                          |      |                                                                                                                                                                                                                                                                                                                                   | e. musculoskeletal comorbidities                                                                                                                                                                                               |                   |                                        |                                                                                                               |                                                                                                                                                                                                            |  |
|                                                          |      |                                                                                                                                                                                                                                                                                                                                   | f. 64.8±9.7 (CR+)                                                                                                                                                                                                              |                   |                                        |                                                                                                               |                                                                                                                                                                                                            |  |
|                                                          |      |                                                                                                                                                                                                                                                                                                                                   | 68.1±10.6 (no CR)                                                                                                                                                                                                              |                   |                                        |                                                                                                               |                                                                                                                                                                                                            |  |
|                                                          |      |                                                                                                                                                                                                                                                                                                                                   | g. 78.1 (CR+)                                                                                                                                                                                                                  |                   |                                        |                                                                                                               |                                                                                                                                                                                                            |  |
|                                                          |      |                                                                                                                                                                                                                                                                                                                                   | 64.7 (no CR)                                                                                                                                                                                                                   |                   |                                        |                                                                                                               |                                                                                                                                                                                                            |  |
| (18) Pack QP et al. 2013 <sup>18</sup><br>USA            | rCCS | a. database of the Division of Cardiovascular Surgery, Mayo Clinic, Rochester including consecutive residents of Olmstedt County<br>b. n=846<br>c. CABG<br>d. 01/1996–12/2007<br>e. Exclusion if combined procedure or discharged to a long-term facility<br>f. 64.4±10.3 (CR+)<br>68.3±11.0 (no CR)<br>g. 78 (CR+)<br>73 (no CR) | a. n=582<br>b. SMC-CR<br>c. majority within 1 mo<br>Mdn: 10 d<br>d. Mdn: 55 d<br>total: Mdn 14 sessions<br>e. n=3 exercise sessions (30–45 min each) + encouragement to exercise for 30min/d on “non CR” days<br>f. outpatient | a. n=264<br>b. UC | a. 9.0±3.7 y<br>b. (1)<br>c. –         | <i>HR (95% CI)</i><br><u>Endpoint 1:</u><br>0.54 (0.40–0.74)<br>p<0.001<br>in favor to CR+                    | - CR attendance was ascertained by Mayo Clinic data base<br>- patients were considered to have participated in CR if they attended at least 1 outpatient session within 6 months of the index CABG surgery |  |
| (19) Coll-Fernández R et al. 2014 <sup>19</sup><br>Spain | pCCS | a. Risk Factors and Arterial Disease (FRENA) registry, Spain(47)<br>b. n=1,043<br>c. AMI<br>d. 5/2003–8/2012<br>e. patients with a first AMI occurring < 3 mo prior to enrollment were considered<br>f. 56.0±10.0 (CR+)<br>67.0±13.0 (no CR)<br>g. 90 (CR+)                                                                       | a. n=521<br>b. based on international clinical practice guidelines, but no standardized protocol for all hospitals<br>c. < 3 mo after AMI<br>d. not reported<br>e. not reported<br>f. outpatient                               | a. n=522<br>b. UC | a. Mean: 18 mo<br>b. (1), (10)<br>c. – | <i>HR (95% CI)</i><br>Endpoint 1:<br>0.08 (0.01-0.63)<br>p=0.16<br>Endpoint 10:<br>0.65 (0.30.1.42)<br>p=0.28 | - Part of the information with respect to study design were obtained from author                                                                                                                           |  |



|                                                   |      | 71 (no CR)                                                                                                                                                                                                                                  |                                                                                                                                                                                                                                                              |                     |                                                                                                                                  |                                                                                                                                                                                                                                                                                                                                                                                                      |                                                                                                                                                                                     |  |  |
|---------------------------------------------------|------|---------------------------------------------------------------------------------------------------------------------------------------------------------------------------------------------------------------------------------------------|--------------------------------------------------------------------------------------------------------------------------------------------------------------------------------------------------------------------------------------------------------------|---------------------|----------------------------------------------------------------------------------------------------------------------------------|------------------------------------------------------------------------------------------------------------------------------------------------------------------------------------------------------------------------------------------------------------------------------------------------------------------------------------------------------------------------------------------------------|-------------------------------------------------------------------------------------------------------------------------------------------------------------------------------------|--|--|
| (20) Prince DZ et al. 2014 <sup>20</sup><br>USA   | rCCS | a. Montefiore Medical Center, New York<br>b. n=822<br>c. mixed population (AMI, CAD, CHF, stable AP, valvular heart disease)<br>d. 01/05/2001–31/01/2011<br>e. –<br>f. 61.6±10.8 (CR+)<br>61.6±12.6 (noCR)<br>g. 63.1 (CR+)<br>58.1 (no CR) | a. n=488<br>b. not reported<br>c. not reported<br>d. not reported<br>e. total (mean±SD):<br>21.6±13.5<br>f. outpatient                                                                                                                                       | a. n=334<br>b. UC   | a. up to 14 y<br>b. (1)<br>c. predictors of CR initiation, adherence and completion                                              | <u>Endpoint 1:</u><br>in favor to CR+,<br>p=0.0022                                                                                                                                                                                                                                                                                                                                                   | - description of CR incomplete, SMC-CR therefore not witnessed<br>- duration of follow-up not exactly defined<br>- steps to reduce selection bias between CR+ and no CR are unclear |  |  |
| (21) Rauch B et al. 2014 <sup>21</sup><br>Germany | pCCS | a. OMEGA trial data base(49)<br>b. n=3,560<br>c. AMI<br>d. 10/2003–06/2007<br>e. >3 mo survival after index event<br>f. Mdn:<br>62 (CR+)<br>69 (no CR)<br>g. 76.4 (CR+)<br>71.1 (no CR)                                                     | a. n=2,513<br>b. SMC-CR<br>c. ≤2 wk after hospital discharge (according to the German CR system, but not witnessed by OMEGA data base)<br>d. 3–4 wk<br>e. ≥5 exercise sessions + education, motivation, psychosocial support<br>f. inpatient (vast majority) | a. n=1,047<br>b. UC | a. 4–12 mo after index event<br>b. (1), (2), (3), (4), (5), (6), (8)<br>c. PCI/CABG, heart failure, medication, laboratory tests | <u>OR (95% CI)</u><br><u>Endpoint 1:</u><br>0.46 (0.27–0.77)<br>in favor to CR+<br><u>Endpoint 2:</u><br>0.43 (0.23–0.79)<br>in favor to CR+<br><u>Endpoint 3:</u><br>0.53 (0.38–0.75)<br>in favor to CR+<br><u>Endpoint 4:</u><br>0.72 (0.43–1.21)<br><u>Endpoint 5:</u><br>0.35 (0.15–0.84)<br>in favor to CR+<br><u>Endpoint 6:</u><br>0.96 (0.81–1.13)<br><u>Endpoint 8:</u><br>1.00 (0.78–1.27) | - CR content and volume controlled by German pension funds<br>- self-reported CR-participation by predefined structured interviews                                                  |  |  |
| (22) Goel K et al. 2015 <sup>22</sup><br>USA      | rCCS | a. Institutional, Mayo Clinic, Rochester Minnesota<br>b. n=201                                                                                                                                                                              | a. n=94<br>b. SMC-CR<br>c. not reported                                                                                                                                                                                                                      | a. n=107<br>b. UC   | a. 6.8±2.8 y<br>b. (1)                                                                                                           | <u>HR (95% CI)</u><br><u>Endpoint 1:</u><br>0.48 (0.27–0.83)                                                                                                                                                                                                                                                                                                                                         |                                                                                                                                                                                     |  |  |

|                                                              |      |                                                                                                                                                                                                                                                                                                       |                                                                                                                                                                                                                        |                      |                  |                                                                                                                                                                                                                                                                                                             |                                                                                                        |
|--------------------------------------------------------------|------|-------------------------------------------------------------------------------------------------------------------------------------------------------------------------------------------------------------------------------------------------------------------------------------------------------|------------------------------------------------------------------------------------------------------------------------------------------------------------------------------------------------------------------------|----------------------|------------------|-------------------------------------------------------------------------------------------------------------------------------------------------------------------------------------------------------------------------------------------------------------------------------------------------------------|--------------------------------------------------------------------------------------------------------|
|                                                              |      | c. CABG + heart valve surgery<br>d. 1996-2007<br>e. Olmsted country residents, aged ≥ 18 y, discharged alive<br>f. 71.5±9.0 (CR+) 73.8±12.0 (no CR)<br>g. 78 (CR+) 57 (no CR)                                                                                                                         | d. 12 wk (phase II), in addition phase III recommended<br>total: Mdn 13<br>e. n=1-3 per wk<br>f. outpatient                                                                                                            |                      |                  |                                                                                                                                                                                                                                                                                                             | p=0.009<br>in favor to CR+,<br>adjusted for<br>propensity scores and<br>mortality risk factors         |
| (23) De Vries H et al. 2015 <sup>23</sup><br>The Netherlands | rCCS | a. Institutional, Dutch health insurance firm, Achmea Zorg en Gezondheid<br>b. n=35,919<br>c. ACS, and/or PCI, CABG and/or valve surgery<br>d. 01/01/2007-01/06/2010<br>e. Alive + insured 365 days before and 180 days after event<br>f. 63.4±10.8 (CR+) 68.1±13.2 (no CR)<br>g. 75 (CR+) 58 (no CR) | a. n=11,014<br>b. SMC-CR<br>c. within 180 d after index event<br>d. 6-12 wk<br>e. n=2.3 exercise sessions per wk + education, psychology, social support, physiotherapy according to Dutch guidelines<br>f. outpatient | a. n=24,905<br>b. UC | a. 4 y<br>b. (1) | <i>HR (±95%CI)</i><br><br><u>Endpoint 1:</u><br>Total population:<br>0.65 (0.56-0.77)<br>p<0.01<br>in favor to CR+,<br>adjusted for<br>propensity scores and<br>mortality risk factors<br><u>Subpopulations:</u><br>CABG/valve surgery:<br>0.55 (0.42-0.74)<br>p<0.01<br>ACS:<br>0.68 (0.57-0.82)<br>p<0.01 | - Extensive management of confounding by automated variable selection out of 919 potential confounders |

|                                                           |      |                                                                                                                                                                                                                                                                         |                                                                                                                                                                                                                                                                                                                                                                                        |                                |                                         |                                                                                                                                                                                                                                           |                                                                                                                                                                                                                                                                                            |
|-----------------------------------------------------------|------|-------------------------------------------------------------------------------------------------------------------------------------------------------------------------------------------------------------------------------------------------------------------------|----------------------------------------------------------------------------------------------------------------------------------------------------------------------------------------------------------------------------------------------------------------------------------------------------------------------------------------------------------------------------------------|--------------------------------|-----------------------------------------|-------------------------------------------------------------------------------------------------------------------------------------------------------------------------------------------------------------------------------------------|--------------------------------------------------------------------------------------------------------------------------------------------------------------------------------------------------------------------------------------------------------------------------------------------|
| (24) Meurs M et al. 2015 <sup>24</sup><br>The Netherlands | rCCS | <p>a. Secondary selection out of two studies: DepreMI, MIND-IT(51, 52)</p> <p>b. n=1,702</p> <p>c. After AMI with or without depression</p> <p>d. 09/1997–09/2000; 09/1999–11/2002</p> <p>e. none</p> <p>f. 57±10 (CR+) 65±11 (no CR)</p> <p>g. 83 (CR+) 75 (no CR)</p> | <p>a. n=878</p> <p>b. SMC-CR</p> <p>c. Mean 63 d after AMI</p> <p>d. 9 we average</p> <p>e. n=2.2 ± 1.6 exercise sessions per wk</p> <p>f. outpatient</p>                                                                                                                                                                                                                              | a. n=824                       | <p>a. 6 y (mean)</p> <p>b. (1), (6)</p> | <p><i>HR (±95%CI)</i></p> <p><u>Endpoint 1:</u><br/>Total population: 0.83 (0.54–1.30) p=0.41<br/>Non depressed patients: 1.09 (0.63–1.89) p=0.74<br/>Depressed patients: 0.48 (0.28–0.84) p=0.01<br/>HR below 1.0 is in favor to CR+</p> | <p>- NOS 5</p> <p>- Information of CR-content, duration and intensity obtained from author by request</p>                                                                                                                                                                                  |
| (25) Schlitt A et al. 2015 <sup>25</sup><br>Germany       | rCCS | <p>a. Secondary analysis of two RCTs with other primary objectives (54)</p> <p>b. n=1,798</p> <p>c. Mixed population: Stable CAD, ACS, CABG, heart failure others</p> <p>d. 2007–2011, 2007–2009</p> <p>e. &gt;18 y, live expectancy &gt; 12 mo</p>                     | <p>a. n=552</p> <p>b. SMC-CR</p> <p>c. Within 180 d after index event as outlined in publication; within 1 mo after index event like ACS or CABG according rules of German authorities</p> <p>d. Not reported: 3–4 we according rules of German authorities</p> <p>e. Not reported: &gt; 5 exercise sessions per week to be supposed</p> <p>f. inpatient (majority) and outpatient</p> | <p>a. n=1,246</p> <p>b. UC</p> | <p>a. 136±71 wk</p> <p>b. (1)</p>       | <p><i>HR (± 95% CI)</i></p> <p><u>Endpoint 1:</u><br/>0.067 (0.025–0.180) p&lt;0.001</p>                                                                                                                                                  | <p>- NOS 4</p> <p>- High risk of selection bias, as study is a secondary evaluation of two RCTs with other objectives<sup>63,64</sup></p> <p>- CR not described in detail within the publication but following minimal standards given by German pension funds and confirmed by author</p> |
| (26) Espinosa                                             | pCCS | a. Institutional, Hospital                                                                                                                                                                                                                                              | a. n=113                                                                                                                                                                                                                                                                                                                                                                               | a. n=40                        | a. 1 y1 y post AMI                      | <i>Event rate</i>                                                                                                                                                                                                                         | - Only patients with                                                                                                                                                                                                                                                                       |

|                                                 |                                                                                                                                                                                                                                                                                                                                                                                                                                                                                  |                                                                                                                                                                                                                                                                                                           |                                                            |                                                                                                                                                         |                                                                                                                                                                                                                                                                                                                                                                                                                 |                                                                                                                                                              |
|-------------------------------------------------|----------------------------------------------------------------------------------------------------------------------------------------------------------------------------------------------------------------------------------------------------------------------------------------------------------------------------------------------------------------------------------------------------------------------------------------------------------------------------------|-----------------------------------------------------------------------------------------------------------------------------------------------------------------------------------------------------------------------------------------------------------------------------------------------------------|------------------------------------------------------------|---------------------------------------------------------------------------------------------------------------------------------------------------------|-----------------------------------------------------------------------------------------------------------------------------------------------------------------------------------------------------------------------------------------------------------------------------------------------------------------------------------------------------------------------------------------------------------------|--------------------------------------------------------------------------------------------------------------------------------------------------------------|
| Caliani S et al. 2004 <sup>26</sup><br>Spain    | Clínico Universitario Virgen de la Victoria, Málaga, Spain.<br>b. N=153<br>c. AMI<br>d. not stated; after 1995<br>e. control group did not accept CR program<br>f. 49.9±8.4 (CR+) 53.5±9.5 (no CR)<br>g. 93.5                                                                                                                                                                                                                                                                    | b. SMC-CR<br>c. Immediately after discharge (phase I)<br>d. 12 wk (phase II) at least 9 mo (phase III)<br>e. n=3 (24 sessions) + educational talks, dietary and nutritional advice, psychological support (3mo, phase II).<br>Maintenance phase III until 12 mo<br>f. primary care centre (phase II, III) | b. CR non-attenders                                        | b. (10)<br>c. Quality of life, exercise capacity, body mass index                                                                                       | (%CR+/noCR)<br>Endpoint 10 (angina, hospitalization, re-infarction, cardiac insufficiency and/or death): 6.7/ 6.7 (p=NS)                                                                                                                                                                                                                                                                                        | low-risk MI<br>- CR by patients' decision<br>- CR supervised by "family doctor" not by cardiologist<br>- CR program accredited by Cardiology Spanish Society |
| (27) Lee JY et al. 2016 <sup>27</sup><br>Canada | pCCS a. Data linkage: ASAN Medical Center-Left MAIN Revascularization registry (single-center retrospective database)<br>b. N=3,040<br>c. mixed population: patients with unprotected LMCA stenosis >50% with subjective or objective ischemia; ACS (64.2%), silent ischemia (8%), stable AP (27.8%)<br>d. 01/01/1995–31/12/2010<br>e. Patients treated with PCI (37.7%), CABG (49.1%) or medically (13.2%); end of follow-up 31/08/2014<br>f. 60.8±10.3 (CR+) 62.4±10.5 (no CR) | a. n=596<br>n=507 (matched pairs)<br>b. SMC-CR<br>c. Within 3 mo after index hospitalization (phase II)<br>d. 3 mo (36 sessions)<br>e. n=3<br>f. outpatient                                                                                                                                               | a. n=2,444<br>n=507 (matched pairs)<br>b. CR non-attenders | a. Mdn 7.3y (IQR, 4.4- 10.2y)<br>b. (1),(2),(4),(5),(8)<br>c. Risk factors' modification, exercise capacity, QoL, return to work, psychological results | <i>Event rate (%CR+/noCR)</i><br>Endpoint 1: 13.3/ 18.5<br>Endpoint 2: 10.4/ 15.5<br>Endpoint 4: 3.0/ 6.7<br>p<0.001 for all<br>Endpoint 5: 2.0/ 3.4<br>p=0.07<br><u>Endpoint 8: 7.3/ 10.9</u><br>p=0.006<br><i>HR (95% CI) after multivariate analysis</i><br>Endpoint 1: 0.70 (0.49–1.00); p=0.05<br>Endpoint 2: 0.69 (0.48–0.97); p=0.03<br>Endpoints 4, 5, 8: p=NS<br><i>HR (95% CI) propensity-matched</i> | - participation in CR was defined as attending at least one outpatient CR session (phase II) within 3 mo after index hospitalization                         |

|                                                      |     |                                                                                                                                                                                                                                                                                          |                                                                                                                                                                                                                                                                         |                                                                    |                                                                                                                                |                                                                                                                                                                                |                               |                                                                                                                                                                                                                              |  |
|------------------------------------------------------|-----|------------------------------------------------------------------------------------------------------------------------------------------------------------------------------------------------------------------------------------------------------------------------------------------|-------------------------------------------------------------------------------------------------------------------------------------------------------------------------------------------------------------------------------------------------------------------------|--------------------------------------------------------------------|--------------------------------------------------------------------------------------------------------------------------------|--------------------------------------------------------------------------------------------------------------------------------------------------------------------------------|-------------------------------|------------------------------------------------------------------------------------------------------------------------------------------------------------------------------------------------------------------------------|--|
|                                                      |     |                                                                                                                                                                                                                                                                                          |                                                                                                                                                                                                                                                                         |                                                                    |                                                                                                                                |                                                                                                                                                                                | g. 76.2 (CR+)<br>72.9 (no CR) | pairs<br>Endpoint 1: 0.62<br>(0.43–0.89); p=0.009<br>Endpoint 2: 0.54<br>(0.36–0.80); p=0.002<br><u>Endpoints 4, 5, 8:</u><br>p=NS                                                                                           |  |
| (28) Aronov DM et al. 2017 <sup>28</sup><br>Russia   | RCT | a. Institutional Moscow Centre of Interventional Cardioangiology.<br>b. N=36<br>c. patients with IHD who had undergone CABG<br>d. not stated; after 1995<br>e. --<br>f. 58.6±7.0 (CR+)<br>55.9±7.0 (no CR)<br>g. 100                                                                     | a. n=18<br>b. SMC-CR (educational program + physical training)<br>c. 2–8 wk after CABG (mean 7.8±1.6 wk)<br>d. 4 mo<br>e. n=3<br>f. monitored (medical supervision) or not-monitored (home based)                                                                       | a. n=18<br>b. CR non-attenders; only educational program available | a. 1 y<br>b. (1), (6), (8), (10)<br>c. Exercise and echocardiography parameters, lipid levels, QoL, AP attacks, return to work | <i>Event (nr CR+/nr no CR)</i><br>Endpoint 1: 0/0<br>Endpoint 6: 1/3<br>Endpoint 8: 1/1<br>Endpoint 10 (AP, MI, re-vascularization, hospitalization for IHD exacerbation): 2/7 |                               | - publication in Russian language (translations received from Cochrane Russia and a private agency)<br>- no statistical analyses of the results<br>- CR had educational component only<br>- contact to author not successful |  |
| (29) Hautala AJ et al. 2017 <sup>29</sup><br>Finland | RCT | a. EFEX-CARE (Effectiveness of Exercise Cardiac Rehabilitation) database of the Finnish Health care setting<br>b. N=204<br>c. ACS<br>d. 02/2011–05/2014<br>e. Exclusion criteria: NYHA ≥III, scheduled or emergency CABG, UA, severe peripheral atherosclerosis, diabetic retinopathy or | a. n=109 (drop-out, n=31)<br>b. SMC-CR<br>c. within 1 wk after hospital discharge<br>d. 1 y<br>e. n=4-5 (1 in hospital session per wk and home-based sessions for 6 mo; thereafter home based only) + information, motivation, education, social and vocational support | a. n=95 (drop-out, n=25)<br>b. UC                                  | a. 1 y<br>b. (10)<br>c. Health care costs, quality-adjusted life years, cost-effectiveness                                     | <i>Event rate (%CR+/no CR)</i><br><u>Endpoint 10 after 1y:</u><br>(combination of death, recurrent acute coronary event, or hospitalization for HF)<br>4.6/16.8, p=0.004       |                               | - Center-based CR under supervision of cardiologists and physiotherapists, all components of SMC-CR were available to most of the patients, no information about psychological support (information provided by the author)  |  |

|                                                 |      |                                                                                                                                                                                                                                                                                                                                                                                                                                                                                                                                     |                                                                                                                                                                                                                                                                                                                                                                                                                                                                                                              |                                                                                                                                           |                                                                                                                               |                                                                                                                                                                                                                                                                                                                                                                                                                                                                                        |                                                                                                                                                                                                                                                                                                                                                                                                                                                                                                                                             |
|-------------------------------------------------|------|-------------------------------------------------------------------------------------------------------------------------------------------------------------------------------------------------------------------------------------------------------------------------------------------------------------------------------------------------------------------------------------------------------------------------------------------------------------------------------------------------------------------------------------|--------------------------------------------------------------------------------------------------------------------------------------------------------------------------------------------------------------------------------------------------------------------------------------------------------------------------------------------------------------------------------------------------------------------------------------------------------------------------------------------------------------|-------------------------------------------------------------------------------------------------------------------------------------------|-------------------------------------------------------------------------------------------------------------------------------|----------------------------------------------------------------------------------------------------------------------------------------------------------------------------------------------------------------------------------------------------------------------------------------------------------------------------------------------------------------------------------------------------------------------------------------------------------------------------------------|---------------------------------------------------------------------------------------------------------------------------------------------------------------------------------------------------------------------------------------------------------------------------------------------------------------------------------------------------------------------------------------------------------------------------------------------------------------------------------------------------------------------------------------------|
|                                                 |      | neuropathy, inability to perform regular home-based exercises (i.e. severe musculoskeletal problems)                                                                                                                                                                                                                                                                                                                                                                                                                                | f. outpatient                                                                                                                                                                                                                                                                                                                                                                                                                                                                                                |                                                                                                                                           |                                                                                                                               |                                                                                                                                                                                                                                                                                                                                                                                                                                                                                        |                                                                                                                                                                                                                                                                                                                                                                                                                                                                                                                                             |
|                                                 |      | f. 60±11 (CR+), 62±9 (no CR)                                                                                                                                                                                                                                                                                                                                                                                                                                                                                                        |                                                                                                                                                                                                                                                                                                                                                                                                                                                                                                              |                                                                                                                                           |                                                                                                                               |                                                                                                                                                                                                                                                                                                                                                                                                                                                                                        |                                                                                                                                                                                                                                                                                                                                                                                                                                                                                                                                             |
|                                                 |      | g. 73 (CR+), 71 (no CR)                                                                                                                                                                                                                                                                                                                                                                                                                                                                                                             |                                                                                                                                                                                                                                                                                                                                                                                                                                                                                                              |                                                                                                                                           |                                                                                                                               |                                                                                                                                                                                                                                                                                                                                                                                                                                                                                        |                                                                                                                                                                                                                                                                                                                                                                                                                                                                                                                                             |
| (30) Doimo S et al. 2018 <sup>30</sup><br>Italy | rCCS | <p>a. Patients discharged from two tertiary hospitals</p> <p>b. N=1,280</p> <p>c. mixed population; STEMI (n=378), NSTEMI (n=265), CABG with or without valve surgery (n=353) or planned PCI (n=284)</p> <p>d. 01/01/2009–31/12/2010</p> <p>e. Non-residents in the region or with severe non-cardiac comorbidities (i.e. end-stage tumors), dementia, or immobilized patients, were excluded from the CR group. 13% of eligible patients did not attend CR</p> <p>f. 68±11 (CR+), 66±12 (no CR)</p> <p>g. 68 (CR+), 75 (no CR)</p> | <p>a. n=839; STEMI (n=251), NSTEMI (n=162), CABG (n=243), PCI (n=183)</p> <p>b. SMC-CR</p> <p>c. 89 d (average)</p> <p>d. 5 mo (average)</p> <p>e. 1<sup>st</sup> part (10 sessions of 45min of cyclette training 2 times/wk for 5 wks); 2<sup>nd</sup> part (18 sessions of 45min of gym training 3 times/wk for 6wks) supervised by trained nurse and physiotherapist. Other components: Lifestyle counseling at every visit + nutritional advice once/mo + psychological support</p> <p>f. outpatient</p> | <p>a. n=441; STEMI (n=127), NSTEMI (n=103), CABG (n=110), PCI (n=101)</p> <p>b. CR non-attenders receiving all other components of CR</p> | <p>a. Mdn 82 mo (IQR 60 – 89 mo)</p> <p>b. PEP: (9)</p> <p>SEP: (1), (2), (6)</p> <p>c. effect of CR in various subgroups</p> | <p><i>Event rate (%CR+/no CR)</i></p> <p>Endpoint 1: 17/18 (p=0.861)</p> <p>Endpoint 2: 6/6 (p=0.623)</p> <p>Endpoint 6: 15/27 (p&lt;0.001)</p> <p>Endpoint 9: 18/30 (p&lt;0.001)</p> <p><i>HR (95% CI)</i></p> <p>Endpoint 9: 0.578 (0.432–0.773); p&lt;0.001</p> <p><i>Event rate, propensity matched analysis (%CR+/ no CR)</i></p> <p>Endpoint 1: 10/19 (p=0.002)</p> <p>Endpoint 2: 2/7 (p=0.008)</p> <p>Endpoint 6: 25/11 (p&lt;0.001)</p> <p>Endpoint 9: 29/13 (p&lt;0.001)</p> | <ul style="list-style-type: none"> <li>- Group allocation by different hospitals</li> <li>- Multivariable regression model and propensity score matching analysis (covariates: age, sex, hypertension, LVEF, DM, smoking, CKD, dyslipidaemia, previous PCI, previous ACS, BB, ACEi/ARB, statins/ezetimibe)</li> <li>- statistical analysis does not address cardiovascular mortality adequately</li> <li>- 5-year composite endpoint as primary outcome (hospitalization for cardiovascular causes and cardiovascular mortality)</li> </ul> |

|                                                              |                                                                                                                                                                                                                                                                                                                                                                                                                                                 |                                                                                                                                                                                                                                                                                                                                                                                                                                                           |                                                |                                                                                                              |                                                                                                                                                                                                                                  |                                                                                                                                                                                                                                         |
|--------------------------------------------------------------|-------------------------------------------------------------------------------------------------------------------------------------------------------------------------------------------------------------------------------------------------------------------------------------------------------------------------------------------------------------------------------------------------------------------------------------------------|-----------------------------------------------------------------------------------------------------------------------------------------------------------------------------------------------------------------------------------------------------------------------------------------------------------------------------------------------------------------------------------------------------------------------------------------------------------|------------------------------------------------|--------------------------------------------------------------------------------------------------------------|----------------------------------------------------------------------------------------------------------------------------------------------------------------------------------------------------------------------------------|-----------------------------------------------------------------------------------------------------------------------------------------------------------------------------------------------------------------------------------------|
| (31) Sunamura M et al. 2018 <sup>31</sup><br>The Netherlands | <p>a. Patients from Erasmus Medical Centre (no CR), Rotterdam were propensity score matched with patients from Capri Cardiac Rehabilitation Center, Rotterdam (CR+)</p> <p>b. N=3,958</p> <p>c. ACS followed by primary PCI</p> <p>d. 2003 - 2011</p> <p>e. Excluded: patients with cardiogenic shock (2.3%) and with early (within 60 d post-PCI) death (5.2%)</p> <p>f. 59.0±9.9 (CR+), 58.8±11.83 (no CR)</p> <p>g. 77 (CR+), 78 (no CR)</p> | <p>a. n=1,159</p> <p>b. SMC-CR</p> <p>c. Mdn 4-6 wk</p> <p>d. 12 wk</p> <p>e. n=2 (1.5h group exercise session). Other components: verbal and written instructions on how to deal with exercise, diet, smoking cessation, and stress management.</p> <p>f. Individual consultations with psychiatrist, psychologist, and social workers was available if necessary. Complete CR if attended at least 75% of the physical program</p> <p>f. outpatient</p> | <p>a. n=1,159</p> <p>b. no CR participants</p> | <p>a. Mdn 10 y 4-12 y (range)</p> <p>b. (1)</p> <p>c. Mortality rates of CR completion vs non-completion</p> | <p><i>Cumulative rates (% CR+/no CR)</i></p> <p>Endpoint 1 at 5 y: 6.4/10.4</p> <p>Endpoint 1 at 10 y: 14.7/23.5</p> <p>HR (95% CI) Endpoint 1 at 10y: (unadjusted) 0.56 (0.43-0.73) (adjusted) 0.61 (0.46-0.81); p&lt;0.001</p> | <p>- Propensity score matching analysis 1:1 (covariates: age, sex, STEMI, current smoking, family history of CAD, HTN, hypercholesterolemia, DM, prior MI, prior history of PCI or CABG, proximal LAD lesion, socioeconomic status)</p> |
|--------------------------------------------------------------|-------------------------------------------------------------------------------------------------------------------------------------------------------------------------------------------------------------------------------------------------------------------------------------------------------------------------------------------------------------------------------------------------------------------------------------------------|-----------------------------------------------------------------------------------------------------------------------------------------------------------------------------------------------------------------------------------------------------------------------------------------------------------------------------------------------------------------------------------------------------------------------------------------------------------|------------------------------------------------|--------------------------------------------------------------------------------------------------------------|----------------------------------------------------------------------------------------------------------------------------------------------------------------------------------------------------------------------------------|-----------------------------------------------------------------------------------------------------------------------------------------------------------------------------------------------------------------------------------------|

Descriptive values of metric variables are given in mean or mean plus standard deviation (SD), if applicable. Other calculations are noted in the table. Mdn, median; N, number of total population, n, number of subpopulation; na, not applicable (not published); d, days; wk, week(s); mo, month(s); y, year(s)

AMI, acute myocardial infarction; AP, angina pectoris; CABG, coronary artery bypass grafting; CAD, coronary artery disease; CHF, congestive heart failure; CR, cardiac rehabilitation; EF, ejection fraction; EP, endpoint; HD, hemodialysis; HREA, hospital readmission for any reason; IG, intervention group; ITT, intention to treat; MACE, major adverse cardiac events (death, non-fatal reinfarction); MACCE, major adverse cardiac and cerebrovascular events (death, non-fatal reinfarction and stroke); pCCS, prospective controlled cohort trial; PCI, percutaneous coronary intervention; PEP, primary endpoint; rCCS, retrospective controlled cohort trial; RCT, randomized controlled trial; SEP, secondary endpoint; SMC-CR, structured and multi-component CR; STEMI, ST-elevation myocardial infarction; NSTEMI, non-ST-elevation myocardial infarction; UC, usual care including ambulatory supervision by family doctor and/or cardiologist, and may also include advise to exercise at home

**Table SM 3b: Studies selected for quantitative analysis (CROS I, search until Dec 2015, and CROS II, search until Sep 2018); reported exercise volumes**

| Study, Publication year, Country                            | Study design | CR phase II duration (weeks) | Physical exercise sessions per week | Sum of CR sessions                               | Population |
|-------------------------------------------------------------|--------------|------------------------------|-------------------------------------|--------------------------------------------------|------------|
| (1) Boulay P et al. 2004 <sup>1</sup> , Canada              | p/rCCT       | 12                           | 2                                   | 24                                               | ACS        |
| (2) Norris CM et al. 2004 <sup>2</sup> , Canada             | rCCS         | 12                           | 2-3                                 | 24-36                                            | mixed      |
| (3) Kutner NG et al. 2006 <sup>3</sup> , USA                | rCCS         | 12                           | 3                                   | 36                                               | CABG       |
| (4) Milani RV et al. 2007 <sup>4</sup> , USA                | rCCS         | 12                           | 3                                   | 36                                               | mixed      |
| (5) Nielsen KM et al. 2008 <sup>5</sup> , Denmark           | rCCS         | 6                            | 2                                   | 12                                               | ACS        |
| (6) Alter DA et al. 2009 <sup>6</sup> , Canada              | rCCS         | 52                           |                                     | 26-36                                            | ACS        |
| (7) Hansen D et al. 2009 <sup>7</sup> , Belgium             | pCCS         | 13                           | 3                                   | minimum 24; 48±25 (mean±SD)                      | CABG       |
| (8) Suaya JA et al. 2009 <sup>8</sup> , USA                 | rCCS         |                              | Not reported                        | average 24; Low: 1-24, High: ≥25                 | mixed      |
| (9) Jünger C et al. 2010 <sup>9</sup> , Germany             | rCCS         | 3-4                          | >5                                  | >20                                              | ACS        |
| (10) Goel K et al. 2011 <sup>10</sup> , USA                 | rCCS         | Not reported                 | 13 mdn                              | Not reported                                     | ACS        |
| (11) Kim C et al. 2011 <sup>11</sup> , Korea                | pCCS         | 6-8                          | Not reported                        | Not reported                                     | ACS        |
| (12) Schwaab B et al. 2011 <sup>12</sup> , Germany          | rCCS         | 3-4                          | >5                                  | >20                                              | mixed      |
| (13) Martin BJ et al. 2012 <sup>13</sup> , Canada           | pCCS         | 12                           | 2-3                                 | 24-36; average 21.9; non completers: average 6.7 | mixed      |
| (14) West RR et al. 2012 <sup>14</sup> , United Kingdom     | pRCT         | 6-8                          | 1-2                                 | 6-16                                             | ACS        |
| (15) Beauchamp A et al. 2013 <sup>15</sup> , Australia      | rCCS         | Not reported                 | Not reported                        | 6-12                                             | mixed      |
| (16) Lee HY et al. 2013 <sup>16</sup> , Korea               | pCCS         | 6                            | 3                                   | 18                                               | ACS        |
| (17) Marzolini S et al. 2013 <sup>17</sup> , Canada         | pCCS         | Not reported                 | Not reported                        | Not reported                                     | ACS        |
| (18) Pack QP et al. 2013 <sup>18</sup> , USA                | rCCS         | 7.8 mdn                      | 3                                   | 14 mdn                                           | CABG       |
| (19) Coll-Fernández R et al. 2014 <sup>19</sup> , Spain     | pCCS         | Not reported                 | Not reported                        | Not reported                                     | ACS        |
| (20) Prince DZ et al. 2014 <sup>20</sup> , USA              | rCCS         | Not reported                 | Not reported                        | 21.6±13.5 (mean±SD), minimum 18                  | mixed      |
| (21) Rauch B et al. 2014 <sup>21</sup> , Germany            | pCCS         | 3-4                          | >5                                  | >20                                              | ACS        |
| (22) Goel K et al. 2015 <sup>22</sup> , USA                 | rCCS         | 12                           | 1-3                                 | 13 mdn (8-20)                                    | CABG       |
| (23) De Vries H et al. 2015 <sup>23</sup> , The Netherlands | rCCS         | 6-12                         | 2.3                                 | 13.8-27.6                                        | mixed      |
| (24) Meurs M et al. 2015 <sup>24</sup> , The Netherlands    | rCCS         | 9                            | 2.2 average                         | 19.8                                             | ACS        |



|                                                             |      |               |                                   |                                       |       |
|-------------------------------------------------------------|------|---------------|-----------------------------------|---------------------------------------|-------|
| (25) Schlitt A et al. 2015 <sup>25</sup> , Germany          | rCCS | 3-4           | >5                                | >20                                   | mixed |
| (26) Espinosa Caliani S et al. 2004 <sup>26</sup> , Spain   | pCCS | not reported  | 3                                 | 24                                    | ACS   |
| (27) Lee JY et al. 2016 <sup>27</sup> , Canada              | pCCS | 12            | 3                                 | 36                                    | mixed |
| (28) Aronov DM et al. 2017 <sup>28</sup> , Russia           | RCT  | 16            | 3                                 | 48                                    | CABG  |
| (29) Hautala AJ et al. 2017 <sup>29</sup> , Finland         | RCT  | 26            | 1 centre-based (+ 3-4 home-based) | 26 centre-based (+ 78-104 home-based) | ACS   |
| (30) Doimo S et al. 2018 <sup>30</sup> , Italy              | rCCS | 22            | 2-3                               | 28                                    | mixed |
| (31) Sunamura M et al. 2018 <sup>31</sup> , The Netherlands | rCCS | 12, 6 minimum | 2                                 | 24                                    | ACS   |

ACS, acute coronary syndrome; CABG, coronary artery bypass grafting; CR, cardiac rehabilitation; mdn, median; pCCS, prospective controlled cohort trial; rCCS, retrospective controlled cohort trial; RCT, randomized controlled trial; SD, standard deviation

**Table SM 4: Excluded studies and justification for exclusion**

| <b>Study</b><br>(abstracts and design papers of studies included into CROS meta-analysis are not listed in this table)<br><b>CO</b> , study was included into Cochrane meta-analysis 2016 <sup>32,33</sup> | <b>Reason for exclusion based on</b>                              | <b>Study selection level:</b><br>PS = PreSelection<br>FTE = Full Text<br>Evaluation<br>SSE = Structured Study<br>Evaluation<br>PS (+) = Only conference abstract available, but study and potential publication has to be followed<br><b>Final search:</b><br><b>Sep 04 2018</b> |
|------------------------------------------------------------------------------------------------------------------------------------------------------------------------------------------------------------|-------------------------------------------------------------------|----------------------------------------------------------------------------------------------------------------------------------------------------------------------------------------------------------------------------------------------------------------------------------|
| <b>1995</b>                                                                                                                                                                                                |                                                                   |                                                                                                                                                                                                                                                                                  |
| Bondestram E et al. <sup>34</sup>                                                                                                                                                                          | (P) Population recruited before 1995                              | PS                                                                                                                                                                                                                                                                               |
| Cannistra LB et al. <sup>35</sup>                                                                                                                                                                          | (C) No control without CR                                         | PS                                                                                                                                                                                                                                                                               |
| Gohlke-Bärwolf C et al. <sup>36</sup>                                                                                                                                                                      | (OR) No original study                                            | PS                                                                                                                                                                                                                                                                               |
| Hamalainen H et al. <sup>37</sup>                                                                                                                                                                          | (P) Index event before 1995                                       | PS                                                                                                                                                                                                                                                                               |
| Scherwitz LW et al. <sup>38</sup>                                                                                                                                                                          | (P) Population recruited before 1995                              | PS                                                                                                                                                                                                                                                                               |
| Heller LF et al. <sup>39</sup>                                                                                                                                                                             | (I) No comprehensive CR                                           | PS                                                                                                                                                                                                                                                                               |
| <b>1996</b>                                                                                                                                                                                                |                                                                   |                                                                                                                                                                                                                                                                                  |
| Jones DA et al. <sup>40</sup>                                                                                                                                                                              | (P) Population recruited before 1995                              | PS                                                                                                                                                                                                                                                                               |
| Lidell E et al. <sup>41</sup>                                                                                                                                                                              | (P) Population recruited before 1995                              | PS                                                                                                                                                                                                                                                                               |
| MRFIT publishers <sup>42</sup>                                                                                                                                                                             | (P) Population recruited before 1995                              | PS                                                                                                                                                                                                                                                                               |
| Allen JK et al. <sup>43</sup>                                                                                                                                                                              | (O) No prognostic outcomes as defined by CROS                     | PS                                                                                                                                                                                                                                                                               |
| Engblom E et al. <sup>44</sup> <b>CO</b>                                                                                                                                                                   | (P) Population recruited before 1995                              | PS                                                                                                                                                                                                                                                                               |
| Rugulies R et al. <sup>45</sup>                                                                                                                                                                            | (C) No control as defined by CROS                                 | PS                                                                                                                                                                                                                                                                               |
| Speccia C et al. <sup>46</sup> <b>CO</b>                                                                                                                                                                   | (P) Population recruited from 1992–1995                           | PS                                                                                                                                                                                                                                                                               |
| <b>1997</b>                                                                                                                                                                                                |                                                                   |                                                                                                                                                                                                                                                                                  |
| Ornish lifestyle program <sup>47</sup>                                                                                                                                                                     | (OR) No original study                                            | PS                                                                                                                                                                                                                                                                               |
| Almeida P et al. <sup>48</sup>                                                                                                                                                                             | (O) No prognostic outcomes                                        | PS                                                                                                                                                                                                                                                                               |
| Bundy C <sup>49</sup>                                                                                                                                                                                      | (OR) Only commentary                                              | PS                                                                                                                                                                                                                                                                               |
| Engblom E et al. <sup>50</sup>                                                                                                                                                                             | (P) Population recruited before 1995                              | PS                                                                                                                                                                                                                                                                               |
| Frasure-Smith et al. <sup>51</sup>                                                                                                                                                                         | (I) No intervention as defined by CROS                            | PS                                                                                                                                                                                                                                                                               |
| Kozlov ID et al. <sup>52</sup>                                                                                                                                                                             | (P) Inclusion period to a significant part before 1995            | PS                                                                                                                                                                                                                                                                               |
|                                                                                                                                                                                                            | (O) No prognostic outcomes                                        |                                                                                                                                                                                                                                                                                  |
| Lee SS <sup>53</sup>                                                                                                                                                                                       | (O) No prognostic outcomes                                        | PS                                                                                                                                                                                                                                                                               |
| Niebauer J et al. <sup>54</sup>                                                                                                                                                                            | (P) Population recruited before 1995                              | PS                                                                                                                                                                                                                                                                               |
| Roseler et al. <sup>55</sup>                                                                                                                                                                               | (P) Population recruited 1993–1995                                | PS                                                                                                                                                                                                                                                                               |
|                                                                                                                                                                                                            | (I) Only phase III CR                                             |                                                                                                                                                                                                                                                                                  |
| Tanabe K et al. <sup>56</sup>                                                                                                                                                                              | (OR) Full paper not available                                     | PS                                                                                                                                                                                                                                                                               |
| Van Dixhoorn J et al. <sup>57</sup>                                                                                                                                                                        | (P) Population recruited before 1995                              | PS                                                                                                                                                                                                                                                                               |
| <b>1998</b>                                                                                                                                                                                                |                                                                   |                                                                                                                                                                                                                                                                                  |
| Ali A et al. <sup>58</sup>                                                                                                                                                                                 | (O) No prognostic outcomes as defined by CROS                     | PS                                                                                                                                                                                                                                                                               |
| Bell JM <sup>59</sup> <b>CO</b>                                                                                                                                                                            | (C) No control according to CROS criteria                         | PS + FTE                                                                                                                                                                                                                                                                         |
| Campbell NC et al. <sup>60</sup>                                                                                                                                                                           | (I) No exercise                                                   | PS                                                                                                                                                                                                                                                                               |
| Carlsson R et al. <sup>61</sup> <b>CO</b>                                                                                                                                                                  | (O) No predefined prognostic outcomes (only surrogate parameters) | PS + FTE                                                                                                                                                                                                                                                                         |
| Fattirolli F et al. <sup>62</sup>                                                                                                                                                                          | (OR) Only description of study design                             | PS                                                                                                                                                                                                                                                                               |
|                                                                                                                                                                                                            | (O) Outcomes do not meet CROS criteria                            |                                                                                                                                                                                                                                                                                  |
| Jitraphai C et al. <sup>63</sup>                                                                                                                                                                           | (P) Population recruited before 1995                              | PS                                                                                                                                                                                                                                                                               |
| Jolly K et al. (SHIP) <sup>64</sup>                                                                                                                                                                        | (O) No prognostic outcomes                                        | PS                                                                                                                                                                                                                                                                               |
| Nahhas GT et al. <sup>65</sup>                                                                                                                                                                             | (OR) Only abstract                                                | PS                                                                                                                                                                                                                                                                               |
| Ornish D et al. <sup>66</sup>                                                                                                                                                                              | (P) Trial conducted before 1995                                   | PS                                                                                                                                                                                                                                                                               |

|                                               |      |                                                                                                      |          |
|-----------------------------------------------|------|------------------------------------------------------------------------------------------------------|----------|
| Ornish D <sup>67</sup>                        | (P)  | Population recruited before 1995                                                                     | PS + FTE |
| Walters J et al. <sup>68</sup>                | (P)  | Population recruited before 1995                                                                     | PS       |
|                                               | (I)  | Phase I rehabilitation                                                                               |          |
| <b>1999</b>                                   |      |                                                                                                      |          |
| Stahle A et al. <sup>69</sup> <b>CO</b>       | (I)  | Only exercise                                                                                        | PS       |
| Ma H et al. <sup>70</sup>                     | (C)  | Not control according to CROS criteria                                                               | PS       |
| Lisspers J et al. <sup>71</sup>               | (P)  | Population recruited 1993–1995                                                                       | PS       |
| Jolly K et al. <sup>72</sup>                  | (O)  | No outcomes as defined by CROS                                                                       | PS       |
| Johnston M et al. <sup>73</sup>               | (O)  | No outcomes as defined by CROS                                                                       | PS       |
| Hofman Bang C et al. <sup>74</sup> <b>CO</b>  | (P)  | Population recruited 1993–1995                                                                       | PS       |
| Dugmore LD et al. <sup>75</sup> <b>CO</b>     | (P)  | Population recruited before 1995                                                                     | PS       |
| Bethell HJN et al. <sup>76</sup>              | (P)  | Population recruited before 1995                                                                     | PS       |
| Wallner S et al. <sup>77</sup>                | (P)  | Population recruited in 1994–1995                                                                    | PS       |
| van Dixhoorn JJ et al. <sup>78</sup>          | (P)  | Population recruitment before 1995                                                                   | PS       |
| Takahashi H et al. <sup>79</sup>              | (P)  | Population recruitment before 1995                                                                   | PS       |
| <b>2000</b>                                   |      |                                                                                                      |          |
| Allison TG et al. CHEER <sup>80</sup>         | (I)  | Intervention without exercise                                                                        | PS       |
| Epstein AM et al. <sup>81</sup>               | (OR) | Only abstract                                                                                        | PS       |
| See also Goss JR et al. <sup>82</sup>         | (O)  | No prognostic outcomes                                                                               |          |
| Fridlund B et al. <sup>83</sup>               | (O)  | No outcomes as defined by CROS                                                                       | PS       |
| Hata R et al. <sup>84</sup>                   | (OR) | Only abstract, full paper not found                                                                  | PS       |
| Naughton J et al. <sup>85</sup>               | (P)  | Population recruited before 1995                                                                     | PS       |
| Pater C et al. CORE study <sup>86</sup>       | (OR) | Only study design, publication of study results not found                                            | PS       |
| Steffen-Batey L et al. <sup>87</sup>          | (P)  | Population recruited before 1995                                                                     | PS       |
| Corpus Christi Heart Project                  |      |                                                                                                      |          |
| Toobert DJ et al. <sup>88</sup> <b>CO</b>     | (O)  | Health related quality of life                                                                       | PS       |
| Women's Lifestyle Heart Trial                 |      |                                                                                                      |          |
| <b>2001</b>                                   |      |                                                                                                      |          |
| Baessler A et al. <sup>89</sup>               | (P)  | Index events before 1995                                                                             | PS + FTE |
| Belardinelli R et al. <sup>90</sup> <b>CO</b> | (P)  | Population recruited before 1995                                                                     | PS       |
| ETICA trial                                   | (I)  | Only exercise                                                                                        |          |
| Denollet J et al. <sup>91</sup>               | (P)  | Population recruited before 1995                                                                     | PS       |
| Fonarow GC et al. <sup>92</sup>               | (I)  | Intervention does not meet CROS criteria                                                             | PS       |
| CHAMP                                         |      |                                                                                                      |          |
| Hedbäck B et al. <sup>93</sup>                | (P)  | Population recruited before 1995                                                                     | PS       |
| Higgins HC et al. <sup>94</sup> <b>CO</b>     | (P)  | Patients after PCI                                                                                   | PS       |
|                                               | (O)  | No predefined prognostic outcomes                                                                    |          |
| Whellan DJ et al. <sup>95</sup>               | (P)  | Index event does not meet CROS criteria and took place before 1995 in a significant part of patients | PS       |
| Sharma B et al. <sup>96</sup>                 | (P)  | Population recruited 1991–1996                                                                       | PS       |
| <b>2002</b>                                   |      |                                                                                                      |          |
| Buchwalsky G et al. <sup>97</sup>             | (I)  | Phase III rehabilitation                                                                             | PS       |
| Desmarais PL et al. <sup>98</sup>             | (C)  | No control                                                                                           | PS       |
| Goss JR et al. <sup>82</sup>                  | (O)  | No clinical events                                                                                   | PS + FTE |
| Hall JP et al. <sup>99</sup>                  | (O)  | No clinical events                                                                                   |          |
| Kavanagh T et al. <sup>100</sup>              | (P)  | Recruitment before 1995                                                                              | PS       |
| La Rovere MT et al. <sup>101</sup> <b>CO</b>  | (P)  | Recruitment before 1995                                                                              | PS       |
| Oldridge N et al. <sup>102</sup>              | (OR) | Meta-analysis                                                                                        | PS       |
| Warren TF <sup>103</sup>                      | (P)  | Index events before 1995                                                                             | PS       |
| Winberg B et al. <sup>104</sup>               | (P)  | Patient's inclusion period to a significant part before 1995                                         | PS + FTE |
| Wright DJ et al. <sup>105</sup>               | (O)  | Outcomes do not meet CROS criteria                                                                   | PS       |
| <b>2003</b>                                   |      |                                                                                                      |          |
| Afrasiabi SG et al. <sup>106</sup>            | (O)  | No prognostic outcomes as defined by CROS                                                            | PS + FTE |
| Aldana SG et al. <sup>107</sup>               | (O)  | Outcomes do not meet CROS criteria                                                                   | PS       |
| (Ornish programme)                            |      |                                                                                                      |          |

|                                                              |      |                                                                                                                             |          |
|--------------------------------------------------------------|------|-----------------------------------------------------------------------------------------------------------------------------|----------|
| Chiashi K et al. <sup>108</sup>                              | (P)  | Inclusion of study participants before 1995                                                                                 | PS       |
| Frenn M et al. <sup>109</sup>                                | (P)  | No index event                                                                                                              | PS + FTE |
| ISRCTN73884263                                               | (OR) | Design paper                                                                                                                | PS       |
| BRUM study <sup>110</sup>                                    | (C)  | Control does not meet CROS criteria                                                                                         |          |
| Johansen S et al. <sup>111</sup>                             | (I)  | No structured and supervised exercise                                                                                       | PS       |
| Marchionni N et al. <sup>112</sup> <b>CO</b>                 | (O)  | No outcomes as defined by CROS                                                                                              | PS       |
| Murchie P et al. <sup>113</sup>                              | (P)  | Patients with CAD, no index events described                                                                                | PS + FTE |
|                                                              | (I)  | No structured exercise                                                                                                      |          |
| Pasquali SK et al. <sup>114</sup>                            | (O)  | Functional status as primary endpoint. Rehospitalization as secondary endpoint biased by premature deaths not evaluated     | PS + FTE |
| Sundin O et al. <sup>115</sup>                               | (O)  | No prognostic outcomes                                                                                                      | PS       |
|                                                              | (C)  | No control as defined by CROS                                                                                               |          |
| Vitcenda M <sup>116</sup>                                    | (C)  | No control as defined by CROS                                                                                               | PS       |
| VHSG Vestfold Heartcare Study Group <sup>117</sup> <b>CO</b> | (P)  | Mixed population with a large part of chronic CAD                                                                           | PS + FTE |
|                                                              | (O)  | No outcomes as defined by CROS, calculating the 5-years CAD risk according to the WOSCOPS study algorithm                   |          |
| Young W et al. <sup>118</sup>                                | (I)  | Intervention does not meet CROS criteria                                                                                    | PS       |
| <b>2004</b>                                                  |      |                                                                                                                             |          |
| Ballegaard S et al. <sup>119</sup>                           | (P)  | Population does not meet CROS criteria                                                                                      | PS       |
|                                                              | (I)  | no structured and supervised Exercise                                                                                       |          |
| Hambrecht R et al. <sup>120</sup> <b>CO</b>                  | (P)  | Only stable angina pectoris                                                                                                 | PS       |
|                                                              | (I)  | Only exercise                                                                                                               |          |
| ISRCTN74601515 <sup>121</sup>                                | (OR) | Study registration (DANREHAB TRIAL), see also Zwisler AD et al. 2005 <sup>90</sup> and Zwisler AD et al. 2008 <sup>91</sup> | PS       |
|                                                              | (P)  | Population does not meet CROS criteria                                                                                      |          |
| Jiang X <sup>122</sup>                                       | (P)  | No index event as described by CROS                                                                                         | PS       |
|                                                              | (O)  | Follow-up too short (3 months)                                                                                              |          |
| Kotseva K et al. <sup>123</sup>                              | (O)  | No prognostic outcomes                                                                                                      | PS       |
| Murchie P et al. <sup>124</sup>                              | (I)  | No structured supervised exercise                                                                                           | PS       |
| Piestrzeniewicz K et al. <sup>125</sup>                      | (C)  | No control as defined by CROS                                                                                               | PS + FTE |
| Sundarajan V et al. <sup>126</sup>                           | (OR) | design problems: linkage of two data bases resulted in classification error in 30% of the participants                      | PS + FTE |
| Witt BJ et al. <sup>127</sup>                                | (P)  | Population recruited from 1982–1998                                                                                         | PS + FTE |
| Yu CM et al. <sup>128</sup>                                  | (O)  | No prognostic outcome                                                                                                       | PS       |
| <b>2005</b>                                                  |      |                                                                                                                             |          |
| Austin J et al. <sup>129</sup>                               | (P)  | No index events as defined by CROS                                                                                          | PS       |
| Briffa TG et al. <sup>130</sup> <b>CO</b>                    | (O)  | no prognostic outcomes (costs, HRQL)                                                                                        | PS + FTE |
| Dendale P et al. <sup>131</sup>                              | (P)  | No index events as described by CROSS                                                                                       | PS + FTE |
| Lisspers J et al. <sup>132</sup>                             | (P)  | Index events do not meet CROS criteria                                                                                      | PS + FTE |
| Maroto Montero JM et al. <sup>133</sup> <b>CO</b>            | (P)  | Inclusion period starts before 1995                                                                                         | PS + FTE |
| Raftery JP et al. <sup>134</sup>                             | (I)  | No structured exercise                                                                                                      | PS + FTE |
| Sinclair AJ et al. <sup>135</sup>                            | (I)  | Intervention does not meet CROS criteria                                                                                    | PS       |
| Zwisler AD et al. <sup>136</sup>                             | (OR) | DANREHAB trial, design paper; See publication of results in 2008 <sup>137</sup>                                             | PS       |
|                                                              | (P)  | Population does not meet CROS Criteria (including risk patients without proven CAD)                                         |          |
| <b>2006</b>                                                  |      |                                                                                                                             |          |
| Bhaskaran A et al. <sup>138</sup>                            | (OR) | Meeting abstract; full paper not found                                                                                      | PS       |
| Herdy AH et al. <sup>139</sup>                               | (OR) | Meeting abstract See publication of results in 2008 <sup>108</sup>                                                          | PS       |

|                                          |      |                                                                                                                |                |
|------------------------------------------|------|----------------------------------------------------------------------------------------------------------------|----------------|
|                                          | (I)  | Intervention does not meet CROS criteria                                                                       |                |
|                                          | (O)  | outcomes do not meet CROS criteria                                                                             |                |
| Kappagoda CT et al. <sup>140</sup>       | (P)  | No index event as defined by CROS                                                                              |                |
|                                          | (C)  | No controls as defined by CROS                                                                                 |                |
| Kovoor P et al. <sup>141</sup> <b>CO</b> | (P)  | selectively low risk patients                                                                                  | PS + FTE + SSE |
|                                          | (I)  | minimal frequency of exercise as defined by CROS may not have been achieved                                    |                |
|                                          | (O)  | Primary outcome does not meet CROS criteria                                                                    |                |
| Lear SA et al. <sup>142</sup>            | (O)  | Outcomes do not meet CROS criteria                                                                             | PS             |
| Soerensen C et al. <sup>143</sup>        | (OR) | Only abstract; full paper based on this title has not been found; compare Nielsen KM et al.2008 <sup>113</sup> | PS             |
| Viswanathan K et al. <sup>144</sup>      | (OR) | Only abstract; full paper not found                                                                            | PS             |
| Zhang YM et al. <sup>145</sup>           | (I)  | Phase I CR in hospital                                                                                         | PS             |
| <b>2007</b>                              |      |                                                                                                                |                |
| Carrol DL et al. <sup>146</sup>          | (I)  | Intervention does not meet CROS criteria                                                                       | PS             |
| Hua ST et al. <sup>147</sup>             | (OR) | Meeting abstract                                                                                               | PS             |
|                                          | (O)  | outcomes do not meet CROS criteria                                                                             |                |
| Jiang X et al. <sup>148</sup>            | (I)  | Intervention does not meet CROS criteria                                                                       | PS             |
|                                          | (O)  | No prognostic outcomes                                                                                         |                |
| Macchi C et al. <sup>149</sup>           | (C)  | No control without CR                                                                                          | PS             |
| Merenich JA et al. <sup>150</sup>        | (I)  | No supervised and professionally controlled exercise sessions                                                  | PS + FTE       |
| Suaya JA et al. <sup>151</sup>           | (O)  | Outcomes do not meet CROS criteria                                                                             | PS + FTE       |
| <b>2008</b>                              |      |                                                                                                                |                |
| Batista IBI et al. <sup>152</sup>        | (OR) | Only abstract, full paper not found                                                                            | PS             |
| Canyon S et al. <sup>153</sup>           | (P)  | Mixed population including patients only at CAD risk                                                           | PS + FTE + SSE |
| Delaney EK et al. <sup>154</sup>         | (P)  | No index events as defined by CROS                                                                             | PS + FTE       |
|                                          | (I)  | No regular supervised exercise                                                                                 |                |
| Dendale P et al. <sup>155</sup>          | (P)  | Primarily patients after elective PCI                                                                          | PS + FTE       |
| Giannuzzi P et al. <sup>156</sup>        | (I)  | Phase III rehabilitation                                                                                       | PS             |
| Herdy AH et al. <sup>157</sup>           | (I)  | phase I rehabilitation                                                                                         | PS             |
|                                          | (O)  | No outcomes as defined by CROS                                                                                 |                |
| Huang Y et al. <sup>158</sup>            | (P)  | Population overlaps with Kutner et al.2006 <sup>128</sup>                                                      | PS + FTE + SSE |
| Kummel M et al. <sup>159</sup>           | (I)  | No structured exercise                                                                                         | PS             |
| Naser A et al. <sup>160</sup>            | (O)  | No outcomes as defined by CROS                                                                                 | PS             |
| Silva RC et al. <sup>161</sup>           | (I)  | No structured exercise sessions                                                                                |                |
| Zwisler AD et al. <sup>137</sup>         | (P)  | Mixed population not following CROS criteria, and including patients without proven CAD                        | PS + FTE + SSE |
| <b>2009</b>                              |      |                                                                                                                |                |
| Cortes OL <sup>162</sup>                 | (OR) | Systematic review                                                                                              | PS             |
| Edstrom-Pluss C et al. <sup>163</sup>    | (C)  | No control group defined by CROS                                                                               | PS             |
|                                          | (I)  | Evaluation of extended CR                                                                                      |                |
| Giallauria F et al. <sup>164</sup>       | (C)  | No control group without CR                                                                                    | PS             |
|                                          | (I)  | Phase III rehabilitation                                                                                       |                |
| Jolly et al. <sup>165</sup>              | (C)  | No control group as defined by CROS                                                                            | PS + FTE       |
| BRUM study                               | (O)  | No prognostic outcomes                                                                                         |                |
| King M et al. <sup>166</sup>             | (C)  | No control group                                                                                               | PS             |
| Lafitte M et al. <sup>167</sup>          | (I)  | No exercise based CR                                                                                           | PS + FTE       |
| CEPTA programme                          | (C)  | No control                                                                                                     |                |
| <b>2010</b>                              |      |                                                                                                                |                |
| Hammill BG et al. <sup>168</sup>         | (C)  | No control as defined by CROS                                                                                  | PS             |
| Hansen D et al. <sup>169</sup>           | (O)  | No control as defined by CROS                                                                                  | PS             |
| NCT01075867 <sup>170</sup>               | (OR) | Study design                                                                                                   | PS             |

|                                            |      |                                                                                                                                                           |                |
|--------------------------------------------|------|-----------------------------------------------------------------------------------------------------------------------------------------------------------|----------------|
| ELIPSE programme                           | (I)  | Intervention does not meet CROS criteria                                                                                                                  |                |
| Onishi T et al. <sup>171</sup>             | (I)  | CR starts too late after index event; exercise intensity is too low                                                                                       | PS + FTE       |
| Silberman A et al. <sup>172</sup>          | (P)  | No index events as defined by CROS                                                                                                                        | PS             |
| SogaY et al. <sup>173</sup>                | (P)  | Only patients after elective PCI                                                                                                                          | PS             |
|                                            | (O)  | Outcome is safety of CR after PCI                                                                                                                         |                |
| <b>2011</b>                                |      |                                                                                                                                                           |                |
| Boyden T F et al. <sup>174</sup>           | (OR) | Conference abstract                                                                                                                                       | PS             |
|                                            | (C)  | No control without CR; see Doll, JA et al.2015 <sup>175</sup>                                                                                             |                |
| Gulliksson M et al. <sup>176</sup>         | (I)  | No exercise based CR                                                                                                                                      | PS             |
| JPRN-UMIN000005177 <sup>177</sup>          | (P)  | No index event as defined by CROS                                                                                                                         | PS             |
| Lam G et al. <sup>178</sup>                | (O)  | Follow-up too short                                                                                                                                       | PS             |
| Lewinter C et al. <sup>179</sup>           | (OR) | Conference abstract; see also Lewinter C et al.2012 <sup>180</sup>                                                                                        | PS             |
|                                            | (I)  | Evaluation of CR referral rather than CR attendance                                                                                                       |                |
| Milani RV et al. <sup>181</sup>            | (P)  | Population is a subset of depressed heart failure patients                                                                                                | PS             |
| Moreno-Palanco MA et al. <sup>182</sup>    | (P)  | Population includes stroke patients                                                                                                                       | PS             |
| MIRVAS study                               | (I)  | No structured and supervised exercise                                                                                                                     |                |
| Piso B et al. <sup>183</sup>               | (I)  | Phase III cardiac rehabilitation                                                                                                                          | PS             |
| Pluss CE et al. <sup>184</sup>             | (C)  | No control group without CR                                                                                                                               | PS             |
| Soga Y et al. <sup>185</sup>               | (P)  | Index event does not meet CROS criteria                                                                                                                   | PS             |
| <b>2012</b>                                |      |                                                                                                                                                           |                |
| Armstrong MJ et al. <sup>186</sup>         | (OR) | Conference abstract, See Armstrong MJ et al.2015                                                                                                          | PS             |
|                                            | (P)  | Population overlaps with the study published by Martin, BJ 2012 <sup>13,187</sup>                                                                         |                |
| Franklin BA <sup>188</sup>                 | (OR) | Comment referring to West RR et al. <sup>14</sup>                                                                                                         | PS             |
| Ghroubi S et al. <sup>189</sup>            | (OR) | Conference abstract                                                                                                                                       | PS             |
|                                            | (O)  | Outcomes do not meet CROS criteria                                                                                                                        |                |
| Iliou MC et al. <sup>190</sup>             | (OR) | Conference abstract, see also Pouche, M et al.2013 (abstract), <sup>191</sup> and Pouche, M et al.2015 <sup>192</sup>                                     | PS             |
| French FAST-MI study                       |      |                                                                                                                                                           |                |
| Kubilius R et al. <sup>193</sup>           | (P)  | Population does not meet CROS criteria                                                                                                                    | PS             |
| Lewinter C et al. <sup>180</sup>           | (I)  | Evaluation of CR referral rather than attendance                                                                                                          | PS             |
| Mayer-Berger W et al. <sup>194</sup>       | (I)  | Phase III cardiac rehabilitation                                                                                                                          | PS             |
| Naranjo-Estupinan NF et al. <sup>195</sup> | (OR) | pCCS with a low number of participants and a high grade of asymmetric distribution within three study arms; no further information from authors available | PS + FTE + SSE |
| Ou HT & Balkrishnan R <sup>196</sup>       | (OR) | Conference abstract,                                                                                                                                      | <b>PS (+)</b>  |
|                                            | (O)  | Effect of CR after AMI on cost effectiveness and rehospitalization                                                                                        |                |
| Parashar S et al. <sup>197</sup>           | (O)  | No prognostic outcomes                                                                                                                                    | PS             |
| Rangel I et al. <sup>198</sup>             | (C)  | Control does not meet CROS criteria                                                                                                                       | PS             |
| Rideout A et al. <sup>199</sup>            | (I)  | Pre-surgical rehabilitation                                                                                                                               | PS             |
| Suzuki T et al. <sup>200</sup>             | (P)  | No predefined index event                                                                                                                                 | PS + FTE       |
| <b>2013</b>                                |      |                                                                                                                                                           |                |
| Carrington MJ et al. <sup>201</sup>        | (I)  | No comprehensive CR as defined by CROS                                                                                                                    | PS             |
| Gambogi R et al. <sup>202</sup>            | (OR) | Conference abstract,                                                                                                                                      | <b>PS (+)</b>  |
|                                            | (I)  | Effect of CR on clinical course, survival and revascularization                                                                                           |                |
| Hung RK et al. <sup>203</sup>              | (I)  | No comprehensive CR as defined by CROS                                                                                                                    | PS             |
| Jorstad HT <sup>204</sup>                  | (I)  | No structured exercise as defined by CROS                                                                                                                 | PS             |
| RESPONSE trial                             |      |                                                                                                                                                           |                |

|                                                              |      |                                                                                                        |                |
|--------------------------------------------------------------|------|--------------------------------------------------------------------------------------------------------|----------------|
| Kotseva K et al. <sup>205</sup><br>EUROASPIRE III            | (O)  | No prognostic outcomes                                                                                 | PS             |
| Lear SA et al. <sup>206</sup>                                | (OR) | conference abstract, not to be followed                                                                | PS             |
|                                                              | (I)  | Internet-based prevention program                                                                      |                |
|                                                              | (O)  | no outcomes as defined by CROS                                                                         |                |
| Longobardi G et al. <sup>207</sup>                           | (OR) | Only abstract, not to be followed                                                                      | PS             |
|                                                              | (I)  | Prognostic effect of physical exercise levels before a cardiac event                                   |                |
| Martin BJ et al. <sup>208</sup>                              | (I)  | Study compares fitness levels                                                                          | PS             |
| Meisinger C et al. <sup>209</sup>                            | (I)  | No structured and supervised Exercise                                                                  | PS             |
| Mudrick DW et al. <sup>210</sup>                             | (OR) | Conference abstract,                                                                                   | <b>PS (+)</b>  |
|                                                              | (O)  | Effect of CR and hospital Readmission                                                                  |                |
| Murphy BM et al. <sup>211</sup>                              | (I)  | No structured supervised exercise                                                                      | PS             |
| Naci H et al. <sup>212</sup>                                 | (OR) | Meta-analysis                                                                                          | PS             |
| Panovsky R et al. <sup>213</sup>                             | (P)  | Only patients with chronic CAD included                                                                | PS + FTE + SSE |
|                                                              | (C)  | No control as defined by CROS                                                                          |                |
| Pouche M et al. <sup>191</sup><br>French FAST-MI study       | (OR) | Conference abstract, see also Pouche M et al.2015 (165)                                                | PS             |
|                                                              | (I)  | CR referral rather than Participation                                                                  |                |
| Russo N et al. <sup>214</sup>                                | (OR) | Conference abstract, not to be followed                                                                | PS             |
|                                                              | (C)  | No control                                                                                             |                |
| Santaularia N et al. <sup>215</sup>                          | (OR) | Study design RCT to evaluate the effect of a structured exercise program in CAD patients with ischemia | <b>PS (+)</b>  |
| Sobolev M. et al. <sup>216</sup>                             | (OR) | Conference abstract                                                                                    | <b>PS (+)</b>  |
|                                                              | (O)  | Comparison of re-hospitalization rates between CR attenders and non-attenders                          |                |
| Turkstra E et al. <sup>217</sup>                             | (I)  | Intervention does not meet CROS criteria                                                               | PS             |
|                                                              | (O)  | Health related quality of life and physical activity                                                   |                |
| Vervueren PL et al. <sup>218</sup><br>French MONICA registry | (OR) | Conference abstract                                                                                    | <b>PS (+)</b>  |
| <b>2014</b>                                                  |      |                                                                                                        |                |
| ACTRN12614000284662 <sup>219</sup>                           | (OR) | Registration of study design                                                                           | <b>PS (+)</b>  |
| Central Australian heart protection Study                    | (I)  | Prognostic effect of a family based secondary prevention program after ACS                             |                |
| Alter DA et al. <sup>220</sup>                               | (C)  | No comparison between CR and non CR                                                                    | PS             |
| Anderson LJ & Taylor RS <sup>221</sup>                       | (OR) | Review of meta-analyses                                                                                | PS             |
| Cobo Gomez N et al. <sup>222</sup>                           | (P)  | No index events as defined by CROS                                                                     | PS             |
| Dunlay SM et al. <sup>223</sup>                              | (P)  | Recruitment 1987–2010                                                                                  | PS + FTE + SSE |
| Otero Chulian E et al. <sup>224</sup>                        | (OR) | Conference abstract, to be followed                                                                    | <b>PS (+)</b>  |
| Expósito-Tirado JA et al. <sup>225</sup>                     | (C)  | No control as defined by CROS                                                                          | PS             |
| Kamath DY et al. <sup>226</sup>                              | (OR) | Design paper, not to be followed                                                                       | PS             |
|                                                              | (I)  | Intervention does not meet CROS Criteria                                                               |                |
| Karmali KN et al. <sup>227</sup>                             | (OR) | Update of a Cochrane review                                                                            | PS             |
| Kim SS et al. <sup>228</sup>                                 | (I)  | No structured and supervised Exercise                                                                  | PS + FTE       |
| Kureshi F et al. <sup>229</sup>                              | (OR) | Conference abstract, Effect of CR on health status scores and mortality after AMI                      | <b>PS (+)</b>  |
| Lewinter C et al. <sup>230</sup>                             | (I)  | CR referral rather than CR Attendance; see also Lewinter C et al.2011 and 2012, <sup>179,180</sup>     | PS + FTE + SSE |
| Lewinter C et al. <sup>231</sup><br>DANREHAB trial           | (OR) | Conference abstract                                                                                    | PS             |
|                                                              | (P)  | Only heart failure patients without primary ACS                                                        |                |
| Lubinskaya E et al. <sup>232</sup>                           | (OR) | Conference abstract, effect of CR on cost effectiveness including prognosis                            | <b>PS (+)</b>  |
| Martin BJ et al. <sup>233</sup>                              | (P)  | Overlap of population with earlier publications, see Martin BJ et al.2012 <sup>13</sup>                | PS + FTE + SSE |
| Maddison R et al. <sup>234</sup> <b>CO</b>                   | (I)  | Intervention does not meet CROS criteria                                                               | PS             |

|                                         |                                                                                                                                                                                        |  |                |
|-----------------------------------------|----------------------------------------------------------------------------------------------------------------------------------------------------------------------------------------|--|----------------|
| REMOTE-CR                               | (C) no controls as defined by CROS<br>(O) no outcomes as defined by CROS                                                                                                               |  |                |
| Ramirez -Moreno A et al. <sup>235</sup> | (OR) Conference abstract, not to be followed<br>(C) no control group<br>(O) RCT evaluating CR compliance rather than CR attendance.                                                    |  | PS             |
| Santoalha JM et al. <sup>236</sup>      | (OR) conference abstract, to be followed<br>(C) control group represents patients with low CR adherence and completing <30% of scheduled CR program                                    |  | PS (+)         |
| Sharma R et al. <sup>237</sup>          | (OR) Conference abstract                                                                                                                                                               |  | PS (+)         |
| APPROACH registry                       | (P) APPROACH registry 2002–2012                                                                                                                                                        |  |                |
| <b>2015</b>                             |                                                                                                                                                                                        |  |                |
| ACTRN12615001247561 <sup>238</sup>      | (OR) Registration of study design                                                                                                                                                      |  | PS (+)         |
| Ammendrup FD et al. <sup>239</sup>      | (C) No control group without CR                                                                                                                                                        |  | PS             |
| Armstrong MJ et al. <sup>240</sup>      | (P) Population Overlap of population compared to study of Martin et al.2012 (confirmed by author)                                                                                      |  | PS + FTE       |
| Bubnova M et al. <sup>241</sup>         | (OR) Conference abstract<br>(I) Intervention might not follow CROS criteria of multi-component CR                                                                                      |  | PS (+)         |
| Chen HM et al. <sup>242</sup>           | (I) Only phase I cardiac rehabilitation                                                                                                                                                |  | PS + FTE + SSE |
| Chew DP et al. <sup>243</sup>           | (OR) Design paper<br>(I) Application of risk stratification tool, no multi-component CR                                                                                                |  | PS             |
| Colbert JD et al. <sup>244</sup>        | (P) Population considerably overlaps with Martin BJ et al.as confirmed by authors                                                                                                      |  | PS + FTE       |
| APPROACH and CWIC registry              |                                                                                                                                                                                        |  |                |
| Cobo Gomez N et al. <sup>245</sup>      | (OR) Conference abstract<br>(O) Mortality and events after PCI in patients with incomplete re-vascularization                                                                          |  | PS (+)         |
| Cobo Gomez N et al. <sup>246</sup>      | (OR) Conference abstract,<br>(P) Patients with ischemic cardiomyopathy and reduced LV-function                                                                                         |  | PS (+)         |
| Coll-Fernandez R. et al. <sup>247</sup> | (OR) Conference abstract<br>(P) Population with a large overlap to a previous study of the same group, Coll-Fernandez, R et al.2014 <sup>214</sup>                                     |  | PS             |
| Deljanin Ilic M et al. <sup>248</sup>   | (OR) Conference abstract<br>(C) No control group as defined by CROS                                                                                                                    |  | PS             |
| Doll JA et al. <sup>175</sup>           | (C) No control group without CR                                                                                                                                                        |  | PS + FTE       |
| ACTION Registry-GWTG                    |                                                                                                                                                                                        |  |                |
| Gencer B et al. <sup>249</sup>          | (OR) Conference abstract                                                                                                                                                               |  | PS             |
| Swiss ELIPS program                     |                                                                                                                                                                                        |  |                |
| Goto Y et al. <sup>250</sup>            | (I) Intervention does not meet CROS Criteria<br>(OR) Conference abstract                                                                                                               |  | PS             |
| Kadda O et al. <sup>251</sup>           | (I) No CR program as defined by CROS, predominantly life style instruction program                                                                                                     |  | PS + FTE       |
| Kim HJ et al. <sup>252</sup>            | (P) Patients after myocardial infarction with diabetes mellitus<br>(C) Patients after myocardial infarction without diabetes mellitus<br>(O) No prognostic outcomes as defined by CROS |  | PS             |
| Kirchberger I et al. <sup>253</sup>     | (I) Case management intervention                                                                                                                                                       |  | PS             |
| Klainman S et al. <sup>254</sup>        | (OR) Conference abstract                                                                                                                                                               |  | PS             |
| Landry M et al. <sup>255</sup>          | (C) No control without CR<br>(O) No prognostic outcome                                                                                                                                 |  | PS             |
| McPhee PG et al. <sup>256</sup>         | (C) No control group without CR<br>(O) No prognostic outcome                                                                                                                           |  | PS             |
| Medina-Inojosa JR et al. <sup>257</sup> | (I) No comprehensive CR as defined by CROS                                                                                                                                             |  | PS             |



|                                           |                                                                                                                                                                                                 |               |
|-------------------------------------------|-------------------------------------------------------------------------------------------------------------------------------------------------------------------------------------------------|---------------|
| NCT02584192 <sup>258</sup>                | (C) No control group without CR<br>(OR) Trial registration                                                                                                                                      | PS            |
| Nishitani-Yokoyan M et al. <sup>259</sup> | (O) No prognostic outcomes as defined by CROS                                                                                                                                                   | PS            |
| NTR5306 <sup>260</sup>                    | (O) No prognostic outcomes as defined by CROS<br>(OR) Trial registration, not to be followed                                                                                                    | PS            |
| Pouche M et al. <sup>192</sup>            | (C) No control group<br>(I) Only evaluation of CR referral, but not CR attendance                                                                                                               | PS + FTE      |
| French FAST-MI registry                   | (confirmed by author)                                                                                                                                                                           |               |
| Romero Reyes MJ et al. <sup>261</sup>     | (OR) Conference abstract,<br>(P) Only elective PCI?                                                                                                                                             | <b>PS (+)</b> |
| Sanchez Martinez M et al. <sup>262</sup>  | (OR) Conference abstract                                                                                                                                                                        | PS            |
| Vataman EB et al. <sup>263</sup>          | (O) No prognostic outcomes<br>(OR) Conference abstract                                                                                                                                          | <b>PS (+)</b> |
| Wang W et al. <sup>264</sup>              | (O) Rehospitalization rate<br>(OR) Conference abstract<br>(I) home based self-management program, no structured supervised exercise<br>(O) Risk parameters and unplanned use of health services | PS            |
| <b>2016</b>                               |                                                                                                                                                                                                 |               |
| Andion Ogando R et al. <sup>265</sup>     | (OR) Conference abstract                                                                                                                                                                        | PS            |
| Andjic M et al. <sup>266</sup>            | (C) No control group<br>(O) No prognostic outcomes as defined by CROS                                                                                                                           | PS            |
| Ding R et al. <sup>267</sup>              | (OR) Conference abstract                                                                                                                                                                        | PS            |
| Dong Z et al. <sup>268</sup>              | (I) Early rehabilitation (phase I)                                                                                                                                                              |               |
| Fukui S et al. <sup>269</sup>             | (P) Patients with inoperable chronic thromboembolic pulmonary hypertension<br>(O) No prognostic outcomes                                                                                        |               |
| Gostoli S et al. <sup>270</sup>           | (O) No prognostic outcomes as defined by CROS                                                                                                                                                   | PS + FTE      |
| Goto Y et al. <sup>271</sup>              | (C) No control group<br>(OR) Group allocation by outcome                                                                                                                                        | PS            |
| Hassan AM et al. <sup>272</sup>           | (O) No prognostic outcomes as defined by CROS                                                                                                                                                   | PS            |
| Hirsch K et al. <sup>273</sup>            | (OR) Protocol of a registry                                                                                                                                                                     | PS            |
| Højskov IE et al. <sup>274</sup>          | (O) No prognostic outcomes                                                                                                                                                                      | PS            |
| Hou WH et al. <sup>275</sup>              | (I) No information about CR details available                                                                                                                                                   | PS + FTE      |
| Huber D et al. <sup>276</sup>             | (I) No CR as defined by CROS<br>(C) No relevant control group<br>(O) No prognostic outcomes                                                                                                     | PS            |
| Iles-Smith H et al. <sup>277</sup>        | (C) No control without CR<br>(O) No prognostic outcomes<br>(OR) Qualitative study design                                                                                                        | PS            |
| JPRN-UMIN000021393 <sup>278</sup>         | (O) No prognostic outcome as defined by CROS<br>(OR) Study registration                                                                                                                         | PS            |
| Kikkenborg BS et al. <sup>279</sup>       | (P) Patients with first time ICD implantation<br>(O) No prognostic outcomes as defined by CROS                                                                                                  | PS            |
| Kuo LY et al. <sup>280</sup>              | (I) Exercise-based CR without further components<br>(OR) Dose-response relationship                                                                                                             | PS            |
| Kureshi F et al. <sup>281</sup>           | (I) No information about CR details available                                                                                                                                                   | PS + FTE      |
| Loprinzi PD et al. <sup>282</sup>         | (I) No cardiac rehabilitation                                                                                                                                                                   | PS            |
| Mandic S et al. <sup>283</sup>            | (P) Patients with CAD, ACS excluded<br>(O) No prognostic outcomes as defined by CROS                                                                                                            | PS + FTE      |
| Marcassa C et al. <sup>284</sup>          | (C) No control group as defined by CROS (CR cohort has been compared with general population including healthy persons)                                                                         | PS + FTE      |
| Nakayama A et al. <sup>285</sup>          | (OR) Conference abstract                                                                                                                                                                        | PS            |
| Nedkoff L et al. <sup>286</sup>           | (I) No cardiac rehabilitation                                                                                                                                                                   | PS            |

|                                         |      |                                                                                                                                                                                               |               |
|-----------------------------------------|------|-----------------------------------------------------------------------------------------------------------------------------------------------------------------------------------------------|---------------|
|                                         | (C)  | No control without CR                                                                                                                                                                         |               |
|                                         | (OR) | Comparison survival in diabetic/non diabetic patients after AMi                                                                                                                               |               |
| Panovsky R et al. <sup>287</sup>        | (OR) | Conference abstract                                                                                                                                                                           | PS            |
| Philippe F et al. <sup>288</sup>        | (I)  | No cardiac rehabilitation                                                                                                                                                                     | PS            |
| Pope M et al. <sup>289</sup>            | (OR) | Comparison between UK and other countries, no investigation of impact of a CR program                                                                                                         | PS            |
| Reibis R et al. <sup>290</sup>          | (C)  | No control without CR                                                                                                                                                                         | PS            |
|                                         | (O)  | No prognostic outcomes                                                                                                                                                                        |               |
|                                         | (OR) | No follow up after CR                                                                                                                                                                         |               |
| Sabbag A et al. <sup>291</sup>          | (OR) | Investigation of CR referral trends over time                                                                                                                                                 | PS            |
| Sharma R et al. <sup>292</sup>          | (P)  | Patients with coronary angiogram showing CAD                                                                                                                                                  | PS + FTE      |
| Silveira C et al. <sup>293</sup>        | (OR) | Conference abstract                                                                                                                                                                           | PS            |
| Sjolin I et al. <sup>294</sup>          | (OR) | Conference abstract                                                                                                                                                                           | PS            |
| Sunamura M et al. <sup>295</sup>        | (OR) | Conference abstract                                                                                                                                                                           | <b>PS (+)</b> |
| Taylor C et al. <sup>296</sup>          | (I)  | Exercise only                                                                                                                                                                                 | PS            |
|                                         | (C)  | No control group without CR                                                                                                                                                                   |               |
|                                         | (OR) | Investigation of association between cardiorespiratory fitness and mortality                                                                                                                  |               |
| Van Halewijn G et al. <sup>297</sup>    | (I)  | Exercise rehabilitation                                                                                                                                                                       | PS            |
|                                         | (OR) | Meta-analasis                                                                                                                                                                                 |               |
| Varnfield M et al. <sup>298</sup>       | (I)  | Home-based CR program                                                                                                                                                                         | PS            |
|                                         | (O)  | No prognostic outcome                                                                                                                                                                         |               |
| Vibulchai N et al. <sup>299</sup>       | (I)  | Intervention without supervised exercise                                                                                                                                                      | PS            |
|                                         | (O)  | No prognostic outcome                                                                                                                                                                         |               |
| Xavier D et al. <sup>300</sup>          | (I)  | Intervention without supervised exercise                                                                                                                                                      | PS            |
|                                         | (O)  | No prognostic outcome                                                                                                                                                                         |               |
| Yuriy Dovgalyuk Y et al. <sup>301</sup> | (C)  | No control group without CR                                                                                                                                                                   | PS            |
| <b>2017</b>                             |      |                                                                                                                                                                                               |               |
| Ades PA et al. <sup>302</sup>           | (OR) | Initiative to increase uptake of CR and prevent cardiovascular events                                                                                                                         | PS            |
| Almeida Morais L et al. <sup>303</sup>  | (OR) | Conference abstract                                                                                                                                                                           | <b>PS (+)</b> |
| Alrohaibani A et al. <sup>304</sup>     | (OR) | Conference abstract                                                                                                                                                                           | <b>PS (+)</b> |
| Alter DA et al. <sup>305</sup>          | (P)  | Mixed population including stable patients and heart failure, population overlap with Alter et al. 2009 <sup>6</sup> (Apr 1-Dec 31, 2003),                                                    | PS + FTE      |
|                                         | (I)  | CR session frequency only 1/week                                                                                                                                                              |               |
|                                         | (OR) | non fitting group design: 4 groups (non referred control, nonparticipants, low dose, high dose)                                                                                               |               |
| Biery D et al. <sup>306</sup>           | (OR) | Conference abstract                                                                                                                                                                           | <b>PS (+)</b> |
| Bravo-Escobar R et al. <sup>307</sup>   | (I)  | Home-based mixed surveillance program                                                                                                                                                         | PS            |
|                                         | (C)  | Exercise-based CR in hospital                                                                                                                                                                 |               |
|                                         | (O)  | No prognostic outcome                                                                                                                                                                         |               |
| Burazor I et al. <sup>308</sup>         | (C)  | No control group without CR                                                                                                                                                                   | PS            |
| Chernomordik FD et al. <sup>309</sup>   | (OR) | Matched group comparison for CR referral, participation not verified, no information about CR uptake after 30 days after hospital discharge, start of CR not clear, group cross-over possible | PS + FTE      |
| Claes J et al. <sup>310</sup>           | (I)  | Home-based CR                                                                                                                                                                                 | PS            |
|                                         | (C)  | Center-based exercise program or usual care                                                                                                                                                   |               |
|                                         | (OR) | Systematic review                                                                                                                                                                             |               |
| CTRI/2017/03/008022 <sup>311</sup>      | (I)  | Counseling on CR aspects                                                                                                                                                                      | PS            |
|                                         | (OR) | Trial registration                                                                                                                                                                            |               |
| Dabek J et al. <sup>312</sup>           | (C)  | No control group without CR                                                                                                                                                                   | PS            |

|                                         |                                                                                                                                                                                                |               |
|-----------------------------------------|------------------------------------------------------------------------------------------------------------------------------------------------------------------------------------------------|---------------|
| Dondo TB et al. <sup>313</sup>          | (O) No prognostic outcome<br>(C) No control group without CR<br>(OR) No controlled cohort trial, investigation of CR enrollment as predictor of survival; no CR description or standardization | PS + FTE      |
| Du L et al. <sup>314</sup>              | (P) Patients with stable coronary artery disease<br>(I) No CR as defined by CROS<br>(OR) Meta-analysis                                                                                         | PS            |
| Ehrman JK et al. <sup>315</sup>         | (P) Patients with reduced ejection fraction                                                                                                                                                    | PS            |
| Fors A et al. <sup>316</sup>            | (I) No CR as defined by CROS                                                                                                                                                                   | PS            |
| Frohman TJ et al. <sup>317</sup>        | (I) Home-based CR<br>(C) No control group without CR                                                                                                                                           | PS            |
| Gabelhouse J et al. <sup>318</sup>      | (O) No prognostic outcome<br>(I) Hybrid CR with supervised/unsupervised exercise<br>(C) Traditional CR                                                                                         | PS            |
| Harun MR et al. <sup>319</sup>          | (O) No prognostic outcome<br>(P) Patients with metabolic syndrome in CR<br>(C) No control group without CR                                                                                     | PS            |
| Hoejkskov I et al. <sup>320</sup>       | (O) No prognostic outcome                                                                                                                                                                      | PS            |
| Ishida T et al. <sup>321</sup>          | (C) No control group without CR                                                                                                                                                                | PS            |
| Jamal UJ <sup>322</sup>                 | (O) No prognostic outcome<br>(I) Home-based CR                                                                                                                                                 | PS            |
| Kachur S et al. <sup>323</sup>          | (OR) Conference abstract                                                                                                                                                                       |               |
| Khoury M et al. <sup>324</sup>          | (OR) Review<br>(OR) Conference abstract, no comparison of CR vs no CR                                                                                                                          | PS<br>PS      |
| Klein J et al. <sup>325</sup>           | (P) stable CAD, elective PCI only, ACS excluded                                                                                                                                                | PS            |
| Kyuno E et al. <sup>326</sup>           | (OR) Conference abstract                                                                                                                                                                       | <b>PS (+)</b> |
| Larsen TR et al. <sup>327</sup>         | (OR) Conference abstract                                                                                                                                                                       | PS            |
| Lee BJ et al. <sup>328</sup>            | (O) No prognostic outcome                                                                                                                                                                      | PS            |
| Lloyd-Jones DM et al. <sup>329</sup>    | (OR) Initiative to increase uptake of CR and prevent cardiovascular events; description of tool estimation of benefits of therapies                                                            | PS            |
| Ma J et al. <sup>330</sup>              | (OR) Conference abstract                                                                                                                                                                       | <b>PS (+)</b> |
| Marcos-Fornioli E et al. <sup>331</sup> | (I) No CR as defined by CROS                                                                                                                                                                   | PS + FTE      |
| Marta Braga M et al. <sup>332</sup>     | (C) No control group without CR<br>(O) No prognostic outcome<br>(OR) Comparison of obese/non obese patients                                                                                    | PS            |
| Minneboo M et al. <sup>333</sup>        | (O) No prognostic outcome                                                                                                                                                                      | PS            |
| Pardaens S et al. <sup>334</sup>        | (OR) Investigation of impact of drop-out of CR on event-free survival                                                                                                                          | PS            |
| Peurois J et al. <sup>335</sup>         | (OR) Conference abstract                                                                                                                                                                       | PS            |
| Pieters K et al. <sup>336</sup>         | (O) No prognostic outcome as defined by CROS                                                                                                                                                   | PS            |
| Prince SA et al. <sup>337</sup>         | (C) No control group without CR                                                                                                                                                                | PS            |
| Puymirat E et al. <sup>338</sup>        | (OR) No controlled cohort study of effects of CR                                                                                                                                               | PS            |
| Taylor C et al. <sup>339</sup>          | (I) Exercise only<br>(C) No control group without CR<br>(OR) Investigation of the effect of exercise dose                                                                                      | PS            |
| Zhao M et al. <sup>340</sup>            | (OR) Investigation of cardioprotective medication use                                                                                                                                          | PS            |
| Zullo MD et al. <sup>341</sup>          | (OR) Investigation of the association between depression and CR participation                                                                                                                  | PS            |
| <b>2018</b>                             |                                                                                                                                                                                                |               |
| Bertelsen JB et al. <sup>342</sup>      | (I) No comprehensive rehabilitation as specified by CROS                                                                                                                                       | PS            |

|                                       |                                                                                                                                  |               |
|---------------------------------------|----------------------------------------------------------------------------------------------------------------------------------|---------------|
| Cao R et al. <sup>343</sup>           | (O) No prognostic outcomes as defined by CROS                                                                                    |               |
|                                       | (O) No prognostic outcomes as defined by CROS                                                                                    | PS            |
|                                       | (OR) Only abstract                                                                                                               |               |
| Colantonio LD et al. <sup>344</sup>   | (O) No prognostic outcomes as defined by CROS                                                                                    | PS            |
|                                       | (OR) Study design, abstract only                                                                                                 |               |
| Cordero A et al. <sup>345</sup>       | (I) No comprehensive rehabilitation as specified by CROS                                                                         | PS + FTE      |
| Dorje T et al. <sup>346</sup>         | (OR) Study protocol                                                                                                              | PS            |
| Flint K et al. <sup>347</sup>         | (I) Patient reported record of CR participation with no detail about timing from discharge to start, duration or structure of CR | PS + FTE      |
| Ghisi GLM et al. <sup>348</sup>       | (OR) Letter to the editors                                                                                                       | PS            |
| Krstacic G et al. <sup>349</sup>      | (OR) Conference abstract                                                                                                         | <b>PS (+)</b> |
| Kruchinova SV et al. <sup>350</sup>   | (OR) Conference abstract                                                                                                         | <b>PS (+)</b> |
| Li S et al. <sup>351</sup>            | (OR) Study investigates referral only                                                                                            | PS + FTE      |
| Long L et al. <sup>352</sup>          | (OR) Systematic review                                                                                                           | PS            |
| Maessen M et al. <sup>353</sup>       | (OR) Conference abstract                                                                                                         | <b>PS (+)</b> |
| Moore N et al. <sup>354</sup>         | (OR) Conference abstract                                                                                                         | <b>PS (+)</b> |
| Nilsson BB et al. <sup>355</sup>      | (O) No prognostic outcomes as defined by CROS                                                                                    | PS            |
| Toshie Tanaka T et al. <sup>356</sup> | (OR) Conference abstract                                                                                                         | <b>PS (+)</b> |

Table SM 5: Study evaluation: Newcastle – Ottawa Scale (NOS)

| Study                                   | Basic design | Representativeness of exposed cohort* | Selection of control | Ascertainment of exposure | Outcome not present at start of study † | Controls for most important factors, intervention and controls are taken from the same cohort | Assessment of outcomes | Follow-up long enough? | Adequacy of follow-up | Sum of positive adjudications (+) |
|-----------------------------------------|--------------|---------------------------------------|----------------------|---------------------------|-----------------------------------------|-----------------------------------------------------------------------------------------------|------------------------|------------------------|-----------------------|-----------------------------------|
| Boulay P et al. <sup>1</sup>            | rCCS         | +                                     | 0                    | +                         | 0                                       | 0                                                                                             | 0                      | +                      | 0                     | 3                                 |
| Norris CM et al. <sup>2</sup>           | rCCS         | +                                     | +                    | +                         | 0                                       | +                                                                                             | +                      | +                      | +                     | 8                                 |
| Kutner NG et al. <sup>3</sup>           | rCCS         | 0                                     | +                    | +                         | 0                                       | +                                                                                             | +                      | +                      | +                     | 7                                 |
| Milani RV et al. <sup>4</sup>           | rCCS         | 0                                     | +                    | +                         | 0                                       | +                                                                                             | +                      | 0                      | 0                     | 6                                 |
| Nielsen KM et al. <sup>5</sup>          | rCCS         | +                                     | +                    | +                         | 0                                       | +                                                                                             | +                      | +                      | +                     | 8                                 |
| Alter DA et al. <sup>6</sup>            | rCCS         | +                                     | +                    | +                         | 0                                       | +                                                                                             | +                      | +                      | +                     | 8                                 |
| Hansen D et al. <sup>7</sup>            | pCCS         | +                                     | 0                    | +                         | +                                       | 0                                                                                             | +                      | +                      | +                     | 6                                 |
| Suaya JA et al. <sup>8</sup>            | rCCS         | +                                     | +                    | +                         | 0                                       | +                                                                                             | +                      | +                      | +                     | 7                                 |
| Jünger J et al. <sup>9</sup>            | rCCS         | +                                     | +                    | +                         | 0                                       | +                                                                                             | +                      | +                      | +                     | 7                                 |
| Goel K et al. <sup>10</sup>             | rCCS         | +                                     | +                    | +                         | 0                                       | +                                                                                             | +                      | +                      | +                     | 7                                 |
| Kim C et al. <sup>11</sup>              | pCCS         | 0                                     | +                    | 0                         | +                                       | +                                                                                             | 0                      | +                      | +                     | 4                                 |
| Schwaab B et al. <sup>12</sup>          | rCCS         | 0                                     | +                    | +                         | 0                                       | +                                                                                             | +                      | +                      | +                     | 6                                 |
| Martin BJ et al. <sup>13</sup>          | pCCS         | +                                     | +                    | +                         | +                                       | +                                                                                             | +                      | 0                      | +                     | 7                                 |
| Beauchamp A et al. <sup>15</sup>        | rCCS         | +                                     | +                    | +                         | 0                                       | +                                                                                             | +                      | +                      | +                     | 7                                 |
| Lee HY et al. <sup>16</sup>             | pCCS         | +                                     | +                    | +                         | +                                       | +                                                                                             | +                      | +                      | +                     | 8                                 |
| Marzolini S et al. <sup>17</sup>        | pCCS         | +                                     | +                    | +                         | +                                       | +                                                                                             | +                      | +                      | +                     | 8                                 |
| Pack QR et al. <sup>18</sup>            | rCCS         | +                                     | +                    | +                         | 0                                       | +                                                                                             | +                      | +                      | +                     | 7                                 |
| Coll-Fernandez R et al. <sup>19</sup>   | pCCS         | +                                     | +                    | +                         | +                                       | +                                                                                             | +                      | +                      | +                     | 8                                 |
| Prince DZ et al. <sup>20</sup>          | rCCS         | +                                     | +                    | +                         | 0                                       | 0                                                                                             | +                      | +                      | +                     | 6                                 |
| Rauch B et al. <sup>21</sup>            | pCCS         | +                                     | +                    | +                         | +                                       | +                                                                                             | +                      | +                      | +                     | 8                                 |
| Goel K et al. <sup>22</sup>             | rCCS         | +                                     | +                    | +                         | 0                                       | +                                                                                             | +                      | +                      | +                     | 7                                 |
| De Vries H et al. <sup>23</sup>         | rCCS         | +                                     | +                    | +                         | 0                                       | +                                                                                             | +                      | +                      | +                     | 7                                 |
| Meurs M et al. <sup>24</sup>            | rCCS         | 0                                     | +                    | +                         | 0                                       | +                                                                                             | +                      | +                      | 0                     | 5                                 |
| Schlitt A et al. <sup>25</sup>          | rCCS         | 0                                     | +                    | 0                         | 0                                       | +                                                                                             | +                      | 0                      | 0                     | 4                                 |
| Lee JY et al. <sup>27</sup>             | pCCS         | +                                     | +                    | +                         | +                                       | +                                                                                             | +                      | +                      | 0                     | 7                                 |
| Espinosa Caliani S et al. <sup>26</sup> | pCCS         | +                                     | +                    | +                         | +                                       | 0                                                                                             | +                      | +                      | 0                     | 6                                 |
| Doimo S et al. <sup>30</sup>            | rCCS         | +                                     | 0                    | +                         | 0                                       | +                                                                                             | +                      | 0                      | 0                     | 5                                 |
| Sunamura M et al. <sup>31</sup>         | rCCS         | +                                     | 0                    | +                         | +                                       | +                                                                                             | +                      | +                      | +                     | 7                                 |

\*representativeness was regarded to be limited if the population was recruited from pre-existing studies with differing goals. † retrospective studies were adjudicated with "0"

**Table SM 6: Sensitivity analyses for all-cause mortality analyses**

| Population | Design | Reason for sensitivity analysis                                               | HR (95% CI)         | OR (95% CI)<br>pooling method | Statistical<br>heterogeneity:<br>I-squared<br>tau-squared<br>p-value |
|------------|--------|-------------------------------------------------------------------------------|---------------------|-------------------------------|----------------------------------------------------------------------|
| ACS        | rCCS   | Meurs M et al.2015: data of independent groups used <sup>24</sup>             | 0.59<br>(0.48-0.73) |                               | 25.2%; 0.012;<br>p=0.26                                              |
| ACS        | rCCS   | Nielsen KM et al.2008: rates for 1-year mortality used <sup>5</sup>           |                     | 0.25 (0.15-0.40)<br>MH *      | 17.1%; 0.052;<br>p=0.27                                              |
| CABG       | rCCS   | De Vries H et al.2015: data of independent groups used <sup>23</sup>          | 0.62<br>(0.54-0.71) |                               | 0.0%; 0.0;<br>p=0.43                                                 |
| CABG       | rCCS   | Goel K et al.2013: data of independent groups used <sup>18</sup>              | 0.60<br>(0.52-0.68) |                               | 10.0%; 0.002;<br>p=0.34                                              |
| MIXED      | rCCS   | Goel K et al.2011: data of propensity score stratification used <sup>10</sup> | 0.52<br>(0.36-0.76) |                               | 84.8%; 0.14;<br>p<0.01                                               |
| MIXED      | rCCS   | Schlitt A et al.2015: data of independent groups used <sup>25</sup>           | 0.45<br>(0.27-0.77) |                               | 92.8%; 0.331<br>p<0.0001                                             |
| MIXED      | rCCS   | Norris CM et al, 2004: rates for matched groups used <sup>2</sup>             |                     | 0.70 (0.37-1.32)<br>MH        | 91.6%; 0.3241;<br>p<0.01                                             |
| MIXED      | pCCS   | Martin BJ et al.2012: data of independent groups used <sup>13</sup>           | 0.59<br>(0.50-0.70) |                               | 0.0%; 0.0; p=0.75                                                    |

\* MH, Mantel-Haenszel method used for pooling

**Table SM 7: Checklist according to MOOSE and PRISMA statements**

| <b>MOOSE statement<sup>357</sup></b>                  |                                                                    | <b>PRISMA statement<sup>358</sup></b> |                                                                                   |
|-------------------------------------------------------|--------------------------------------------------------------------|---------------------------------------|-----------------------------------------------------------------------------------|
| <b>Section, topic</b>                                 | <b>Described in manuscript: yes/no; comments</b>                   | <b>Section, topic</b>                 | <b>Described in manuscript: yes/no; comments</b>                                  |
|                                                       |                                                                    | <b>Title</b>                          | Yes                                                                               |
|                                                       |                                                                    | Structured summary                    | Yes                                                                               |
| <b>Reporting of Background</b>                        |                                                                    | <b>Introduction</b>                   |                                                                                   |
| Problem definition                                    | Yes, Introduction                                                  | Rational                              | Yes                                                                               |
| Hypothesis                                            | Yes, Introduction                                                  | Objectives                            | Yes                                                                               |
| Description of study outcomes                         | Yes, Methods, Table SM1                                            |                                       |                                                                                   |
| Type of intervention                                  | Yes, Methods, Table SM1                                            |                                       |                                                                                   |
| Type of study designs                                 | Yes, Methods, Table SM1                                            |                                       |                                                                                   |
| Study population                                      | Yes, Methods, Table SM1                                            |                                       |                                                                                   |
| <b>Reporting of Search Strategy</b>                   |                                                                    |                                       |                                                                                   |
| Qualification of searchers                            | Yes, Methods                                                       |                                       |                                                                                   |
| Search strategy, time period                          | Yes, Methods, Supplemental Material Table SM 2                     |                                       |                                                                                   |
| Effort to include all available studies               | Yes, Methods, Figure 1, Table 1, Supplemental Material Table SM 3a |                                       |                                                                                   |
| Data bases searched                                   | Yes, Summary, Methods, Supplemental Material, Table SM 2           |                                       |                                                                                   |
| Search software used                                  | Yes, Methods                                                       |                                       |                                                                                   |
| Use of hand-searching                                 | Yes, routinely done in reference lists of selected studies         |                                       |                                                                                   |
| List of citations located and excluded                | Yes, Table 1 and Supplemental Material, Table SM 2, SM 3a          |                                       |                                                                                   |
| Methods of handling abstracts and unpublished studies | Yes, Supplemental Material, Table SM4                              |                                       |                                                                                   |
| Description of contact to authors                     | Yes, Table 1, Supplemental Material Table SM 3a                    |                                       |                                                                                   |
| <b>Reporting of Methods</b>                           |                                                                    | <b>Reporting of Methods</b>           |                                                                                   |
| Appropriateness of studies assessed                   | Yes, Table 1                                                       | Protocol and registration             | Yes; PROSPERO CRD42014007084                                                      |
| Rational for selection and coding of data             | Yes, Methods                                                       | Eligibility criteria, PICOS           | Yes, Methods, Table 1                                                             |
| Documentation of how data were classified and coded   | Yes, Methods, Figure 1                                             | Information sources                   | Yes; Methods, Supplemental Material Table SM 2                                    |
| Assessment of confounding                             | Yes, Methods, Tables 3a, 3b, Supplemental Material Table SM4       | Search                                | Electronic search strategy described in Methods, Supplemental Material, Table SM2 |
| Assessment of study quality                           | Yes, Methods, Tables 3a, 3b, SM5                                   | Study selection                       | Yes; Methods, Fig. 1; Supplemental Material. Tables SM2, SM4                      |

|                                                        |                                                 |                                         |                                                                |
|--------------------------------------------------------|-------------------------------------------------|-----------------------------------------|----------------------------------------------------------------|
| Assessment of heterogeneity                            | Yes, Methods, Figure 2, Table 2                 | Data collection process                 | Yes; Methods                                                   |
| Description of statistical methods                     | Yes, Methods                                    | Data items                              | Yes, Methods, Table SM 1 (predefined PICOs)                    |
| Appropriate Figures and Tables                         | Yes                                             | Risk of bias in individual studies      | Yes; Methods, Tables 3a, 3b; Supplemental Material, Table SM 5 |
|                                                        |                                                 | Summary measures                        | Yes, Methods; Results                                          |
|                                                        |                                                 | Synthesis of results                    | Yes, Methods                                                   |
|                                                        |                                                 | Risk of bias across the studies         | Yes, Methods                                                   |
|                                                        |                                                 | Additional analyses                     | Yes, sensitivity analyses, Supplemental Material, Table SM 5   |
| <b>Reporting of Results</b>                            |                                                 | <b>Reporting of Results</b>             |                                                                |
| Giving descriptive information for each study included | Yes, Table 1, Supplemental Material Table SM 3a | Study selection                         | Yes, Results, Figure 1                                         |
|                                                        |                                                 | Study characteristics                   | Yes, Table                                                     |
|                                                        |                                                 | Results of individual studies           | Yes, Table SM 1                                                |
|                                                        |                                                 | Risk of bias within the studies         | Yes, Tables 3a,b; Suppl. Material, Table SM 5                  |
| Graphics and tables summarizing results                | Yes, Figure 2, Table 2                          | Synthesis                               | Yes, Figure 2, Table 2                                         |
| Indication of statistical uncertainty                  | Yes, Figure 2, Table 2                          | Risk of bias across studies             | Addressed, see “statistical analysis” in Methods               |
| Results of sensitivity testing                         | Yes, Results, Supplemental Material, Table SM 6 | Additional analyses                     | Yes, sensitivity analysis, Supplemental Material Table SM 6    |
| <b>Reporting of Discussion</b>                         |                                                 | <b>Reporting of Discussion</b>          |                                                                |
| Quantitative assessment of bias                        | Yes                                             | Summary of evidence                     | Yes                                                            |
| Justification of exclusion                             | Yes                                             | Limitations                             | Not explicitly, addressed in discussion.                       |
| Assessment of quality                                  | Yes                                             |                                         |                                                                |
| <b>Reporting of Conclusions</b>                        |                                                 | <b>Reporting of Conclusions</b>         |                                                                |
| Consideration of alternative explanations              | Yes                                             | Conclusions                             | Yes                                                            |
| Generalization of the conclusions                      | Yes                                             | General interpretation and implications | Yes                                                            |
| Guidelines for future research                         | Yes                                             |                                         |                                                                |
| Disclosure of funding source                           | Yes                                             | <b>Funding</b>                          | Yes                                                            |



## References

1. Boulay P and Prud'homme D. Health-care consumption and recurrent myocardial infarction after 1 year of conventional treatment versus short- and long-term cardiac rehabilitation. *Preventive medicine* 2004; 38: 586–593.
2. Norris CM, Jensen LA, Galbraith PD, et al. Referral rate and outcomes of cardiac rehabilitation after cardiac catheterization in a large Canadian city. *J Cardiopulm Rehabil* 2004; 24: 392–400.
3. Kutner NG, Zhang R, Huang Y, et al. Cardiac rehabilitation and survival of dialysis patients after coronary bypass. *Journal of the American Society of Nephrology JASN* 2006; 17: 1175–1180.
4. Milani RV and Lavie CJ. Impact of cardiac rehabilitation on depression and its associated mortality. *The American journal of medicine* 2007; 120: 799–806.
5. Nielsen KM, Faergeman O, Foldspang A, et al. Cardiac rehabilitation: health characteristics and socio-economic status among those who do not attend. *European journal of public health* 2008; 18: 479–483.
6. Alter DA, Oh PI and Chong A. Relationship between cardiac rehabilitation and survival after acute cardiac hospitalization within a universal health care system. *European journal of cardiovascular prevention and rehabilitation official journal of the European Society of Cardiology, Working Groups on Epidemiology & Prevention and Cardiac Rehabilitation and Exercise Physiology* 2009; 16: 102–113.
7. Hansen D, Dendale P, Leenders M, et al. Reduction of cardiovascular event rate: different effects of cardiac rehabilitation in CABG and PCI patients. *Acta cardiologica* 2009; 64: 639–644.
8. Suaya JA, Stason WB, Ades PA, et al. Cardiac rehabilitation and survival in older coronary patients. *Journal of the American College of Cardiology* 2009; 54: 25–33.
9. Junger C, Rauch B, Schneider S, et al. Effect of early short-term cardiac rehabilitation after acute ST-elevation and non-ST-elevation myocardial infarction on 1-year mortality. *Current medical research and opinion* 2010; 26: 803–811.
10. Goel K, Lennon RJ, Tilbury RT, et al. Impact of cardiac rehabilitation on mortality and cardiovascular events after percutaneous coronary intervention in the community. *Circulation* 2011; 123: 2344–2352.

11. Kim C, Kim DY and Moon CJ. Prognostic influences of cardiac rehabilitation in Korean acute myocardial infarction patients. *Annals of rehabilitation medicine* 2011; 35: 375–380.
12. Schwaab B, Waldmann A, Katalinic A, et al. In-patient cardiac rehabilitation versus medical care - a prospective multicentre controlled 12 months follow-up in patients with coronary heart disease. *European journal of cardiovascular prevention and rehabilitation official journal of the European Society of Cardiology, Working Groups on Epidemiology & Prevention and Cardiac Rehabilitation and Exercise Physiology* 2011; 18: 581–586.
13. Martin BJ, Hauer T, Arena R, et al. Cardiac rehabilitation attendance and outcomes in coronary artery disease patients. *Circulation* 2012; 126: 677–687.
14. West RR, Jones DA and Henderson AH. Rehabilitation after myocardial infarction trial (RAMIT): multi-centre randomised controlled trial of comprehensive cardiac rehabilitation in patients following acute myocardial infarction. *Heart (British Cardiac Society)* 2012; 98: 637–644.
15. Beauchamp A, Worcester M, Ng A, et al. Attendance at cardiac rehabilitation is associated with lower all-cause mortality after 14 years of follow-up. *Heart (British Cardiac Society)* 2013; 99: 620–625.
16. Lee HY, Kim JH, Kim BO, et al. Regular exercise training reduces coronary restenosis after percutaneous coronary intervention in patients with acute myocardial infarction. *International journal of cardiology* 2013; 167: 2617–2622.
17. Marzolini S, Leung YW, Alter DA, et al. Outcomes associated with cardiac rehabilitation participation in patients with musculoskeletal comorbidities. *European journal of physical and rehabilitation medicine* 2013.
18. Pack QR, Goel K, Lahr BD, et al. Participation in cardiac rehabilitation and survival after coronary artery bypass graft surgery: a community-based study. *Circulation* 2013; 128: 590–597.
19. Coll-Fernandez R, Coll R, Pascual T, et al. Cardiac rehabilitation and outcome in stable outpatients with recent myocardial infarction. *Archives of physical medicine and rehabilitation* 2014; 95: 322–329.
20. Prince DZ, Sobolev M, Gao J, et al. Racial disparities in cardiac rehabilitation initiation and the effect on survival. *PM & R the journal of injury, function, and rehabilitation* 2014; 6: 486–492.

21. Rauch B, Riemer T, Schwaab B, et al. Short-term comprehensive cardiac rehabilitation after AMI is associated with reduced 1-year mortality: results from the OMEGA study. *European journal of preventive cardiology* 2014; 21: 1060–1069.
22. Goel K, Pack QR, Lahr B, et al. Cardiac rehabilitation is associated with reduced long-term mortality in patients undergoing combined heart valve and CABG surgery. *European journal of preventive cardiology* 2015; 22: 159–168.
23. Vries H de, Kemps HM, van Engen-Verheul MM, et al. Cardiac rehabilitation and survival in a large representative community cohort of Dutch patientsdagger. *European heart journal* 2015.
24. Meurs M, Burger H, Riezen J, et al. *The association between cardiac rehabilitation and mortality risk for myocardial infarction patients with and without depressive symptoms: Journal of affective disorders*; 188: 278–283.
25. Schlitt A, Wischmann P, Wienke A, et al. Rehabilitation in Patients With Coronary Heart Disease: Participation and Its Effect on Prognosis. *Dtsch Arztebl Int* 2015; 112: 527–534.
26. Espinosa Caliani S, Bravo Navas JC, Gómez-Doblas JJ, et al. Rehabilitación cardíaca postinfarto de miocardio en enfermos de bajo riesgo. Resultados de un programa de coordinación entre cardiología y atención primaria. *Revista española de cardiología* 2004; 57: 53–59.
27. Lee JY, Ahn JM, Park DW, et al. Impact of exercise-based cardiac rehabilitation on long-term clinical outcomes in patients with left main coronary artery stenosis. *European journal of preventive cardiology* 2016; 23: 1804–1813.
28. Aronov DM, Bubnova MG, Ioseliani DG, et al. The Complex Program of Rehabilitation of Patients With Ischemic Heart Disease After Coronary Artery Bypass Surgery in Ambulatory Cardiorehabilitational Department: Clinical Effects of Third Stage of Rehabilitation. *Kardiologija* 2017; 57: 10–19.
29. Hautala AJ, Kiviniemi AM, Makikallio T, et al. Economic evaluation of exercise-based cardiac rehabilitation in patients with a recent acute coronary syndrome. *Scandinavian journal of medicine & science in sports* 2017; 27: 1395–1403.
30. Doimo S, Fabris E, Piepoli M, et al. Impact of ambulatory cardiac rehabilitation on cardiovascular outcomes: a long-term follow-up study. *European Heart Journal* 2019; 40: 678–685.

31. Sunamura M, Ter Hoeve N, van den Berg-Emons, R. J. G., et al. Cardiac rehabilitation in patients with acute coronary syndrome with primary percutaneous coronary intervention is associated with improved 10-year survival. *Eur Heart J Qual Care Clin Outcomes* 2018; 4: 168–172.
32. Anderson L, Oldridge N, Thompson DR, et al. Exercise-Based Cardiac Rehabilitation for Coronary Heart Disease: Cochrane Systematic Review and Meta-Analysis. *Journal of the American College of Cardiology* 2016; 67: 1–12.
33. Anderson L, Thompson DR, Oldridge N, et al. Exercise-based cardiac rehabilitation for coronary heart disease. *The Cochrane database of systematic reviews* 2016: Cd001800.
34. Bondestam E, Breikss A and Hartford M. Effects of early rehabilitation on consumption of medical care during the first year after acute myocardial infarction in patients > or = 65 years of age. *The American journal of cardiology* 1995; 75: 767–771.
35. Cannistra LB, Omalley CJ and Balady GJ. Comparison of Outcome of Cardiac Rehabilitation in Black-Women and White Women. *Am. J. Cardiol.* 1995; 75: 890–893.
36. Gohlke-Barwolf C and Gohlke H. Further evidence for beneficial effects of comprehensive cardiac rehabilitation in men with coronary artery disease (1995, accessed (Gohlke-Barwolf, Gohlke) Heart Center Bad Krozingen, Sudring 15, D-79189 Bad Krozingen, Germany16).
37. Hamalainen H, Luurila OJ, Kallio V, et al. Reduction in sudden deaths and coronary mortality in myocardial infarction patients after rehabilitation. 15 year follow-up study. *European heart journal* 1995; 16: 1839–1844.
38. Scherwitz LW, Brusis OA, Kesten D, et al. [Life style changes in patients with myocardial infarct in the framework of intramural and ambulatory rehabilitation--results of a German pilot study]. *Zeitschrift fur Kardiologie* 1995; 84: 216–221.
39. Heller RF, Lim L, Valenti L, et al. A randomised controlled trial of community based counselling among those discharged from hospital with ischaemic heart disease. *Australian and New Zealand journal of medicine* 1995; 25: 362–364.
40. Jones DA and West RR. Psychological rehabilitation after myocardial infarction: multicentre randomised controlled trial. *BMJ (Clinical research ed.)* 1996; 313: 1517–1521.
41. Lidell E and Fridlund B. Long-term effects of a comprehensive rehabilitation programme after myocardial infarction. *Scandinavian journal of caring sciences* 1996; 10: 67–74.

42. Mortality after 16 years for participants randomized to the Multiple Risk Factor Intervention Trial. *Circulation* 1996; 94: 946–951.
43. Allen JK. Coronary risk factor modification in women after coronary artery bypass surgery. *Nursing research* 1996; 45: 260–265.
44. Engblom E, Korpilahti K, Hamalainen H, et al. Effects of five years of cardiac rehabilitation after coronary artery bypass grafting on coronary risk factors. *The American journal of cardiology* 1996; 78: 1428–1431.
45. Rugulies R, Jager A, Benesch L, et al. *Comprehensive lifestyle changes among patients with CHD and the integration of inpatient and outpatient cardiac rehabilitation: Zeitschrift fur Gesundheitswissenschaften*; 4(3): 234–247.
46. Specchia G, DeServi S, Scire A, et al. Interaction between exercise training and ejection fraction in predicting prognosis after a first myocardial infarction. *Circulation* 1996; 94: 978–982.
47. Ornish lifestyle modification program continues to produce impressive outcomes for CHD. *Healthcare demand & disease management* 1997; 3: 59–61.
48. Almeida P, Miranda F, Silva P, et al. [The effects of a cardiac rehabilitation program on 2 populations of coronary patients: acute myocardial infarct and coronary bypass surgery]. *Revista portuguesa de cardiologia orgao oficial da Sociedade Portuguesa de Cardiologia = Portuguese journal of cardiology an official journal of the Portuguese Society of Cardiology* 1997; 16: 767-72, 744-5.
49. Bundy C. Rehabilitation after heart attack [11] (1997, accessed (Bundy) School Psychiatry Behavioural Sci., University of Manchester, Manchester M13 7PT, United Kingdom314).
50. Engblom E, Korpilahti K, Hamalainen H, et al. Quality of life and return to work 5 years after coronary artery bypass surgery. Long-term results of cardiac rehabilitation. *Journal of cardiopulmonary rehabilitation* 1997; 17: 29–36.
51. Frasure-Smith N, Lesperance F, Prince RH, et al. Randomised trial of home-based psychosocial nursing intervention for patients recovering from myocardial infarction. *Lancet* 1997; 350: 473–479.
52. Kozlov ID, Fomina RF, Apanasevich VV, et al. [The effect of a 5-year program of IHD prevention on the risk profile and mortality]. *Terapevticheskii arkhiv* 1997; 69: 14–17.

53. Lee SS. Hospital-home care critical pathways in cardiothoracic disease management: one-year outcome data of 164 post-operative cardiothoracic surgical patients. *Journal of Care Management* 1997; 3: 31-31-2, 37-8, 44 passim.
54. Niebauer J, Hambrecht R, Velich T, et al. Attenuated progression of coronary artery disease after 6 years of multifactorial risk intervention - Role of physical exercise. *Circulation* 1997; 96: 2534–2541.
55. Roseler S, Schwartz FW and Karoff M. [Evaluation of the effectiveness of an ambulatory after-care rehabilitation program]. *Gesundheitswesen (Bundesverband der Ärzte des Öffentlichen Gesundheitsdienstes (Germany))* 1997; 59: 236–241.
56. Tanabe K, Yokoyama Y, Yamamoto A, et al. Cardiac Rehabilitation in Patients with Myocardial Infarction. *Japanese Journal of Rehabilitation Medicine* 1997; 34: 257+.
57. van Dixhoorn J. [Favorable effects of breathing and relaxation instructions in heart rehabilitation: a randomized 5-year follow-up study]. *Nederlands tijdschrift voor geneeskunde* 1997; 141: 530–534.
58. Ali A, Mehra MR, Lavie CJ, et al. Modulatory impact of cardiac rehabilitation on hyperhomocysteinemia in patients with coronary artery disease and "normal" lipid levels. *The American journal of cardiology* 1998; 82: 1543-5, a8.
59. Bell JM. *A comparison of a multi-disciplinary home based cardiac rehabilitation programme with comprehensive conventional rehabilitation in post-myocardial infarction patients: Thesis submitted to the University of London for the degree of Doctor of Philosophy.*
60. Campbell NC, Thain J, Deans HG, et al. Secondary prevention clinics for coronary heart disease: randomised trial of effect on health. *Br. Med. J.* 1998; 316: 1434–1437.
61. Carlsson R. Serum cholesterol, lifestyle, working capacity and quality of life in patients with coronary artery disease. Experiences from a hospital-based secondary prevention programme. *Scandinavian cardiovascular journal. Supplement* 1998; 50: 1–20.
62. Fattirolli F, Cartei A, Burgisser C, et al. Aims, design and enrollment rate of the Cardiac Rehabilitation in Advanced Age (CR-AGE) randomized, controlled trial. *Aging (Milan, Italy)* 1998; 10: 368–376.
63. Jitpraphai C and Kantaratanakul V. Rehabilitation in uncomplicated myocardial infarction at Ramathibodi Hospital: 5 years follow-up. *Journal of the Medical Association of Thailand = Chotmaihet thangkaet* 1998; 81: 288–291.

64. Jolly K, Bradley F, Sharp S, et al. Follow-up care in general practice of patients with myocardial infarction or angina pectoris: initial results of the SHIP trial. Southampton Heart Integrated Care Project. *Family practice* 1998; 15: 548–555.
65. Nahhas GT, Bouffard RA, Hills EE, et al. Structured vs. non structured cardiac rehabilitation after coronary artery bypass surgery: An outcome-based analysis. *J. Am. Coll. Cardiol.* 1998; 31: 171A-171A.
66. Ornish D, Scherwitz LW, Billings JH, et al. Intensive lifestyle changes for reversal of coronary heart disease. *JAMA* 1998; 280: 2001–2007.
67. Ornish D. Avoiding revascularization with lifestyle changes: The multicenter lifestyle demonstration project (1998, accessed (Ornish) Prev. Medicine Research Institute, Sausalito, CA, United States82).
68. Walters J, Schwartz CF, Monaghan H, et al. Long-term outcome following case management after coronary artery bypass surgery. *Journal of cardiac surgery* 1998; 13: 123–128.
69. Stahle A, Mattsson E, Ryden L, et al. Improved physical fitness and quality of life following training of elderly patients after acute coronary events. A 1 year follow-up randomized controlled study. *European heart journal* 1999; 20: 1475–1484.
70. Ma H, Liao X and Dong Y. Effects of early rehabilitation program on AMI patients (1999, accessed (Ma, Liao, Dong) First Affiliated Hospital, Sun Yat-sen Univ. of Med. Sciences, Guangzhou 510080, China27).
71. Lisspers J, Sundin O, Hofman-Bang C, et al. Behavioral effects of a comprehensive, multifactorial program for lifestyle change after percutaneous transluminal coronary angioplasty: a prospective, randomized controlled study. *Journal of psychosomatic research* 1999; 46: 143–154.
72. Jolly K, Bradley F, Sharp S, et al. Randomised controlled trial of follow up care in general practice of patients with myocardial infarction and angina: final results of the Southampton heart integrated care project (SHIP). The SHIP Collaborative Group. *BMJ (Clinical research ed.)* 1999; 318: 706–711.
73. Johnston M, Foulkes J, Johnston DW, et al. Impact on patients and partners of inpatient and extended cardiac counseling and rehabilitation: a controlled trial. *Psychosomatic medicine* 1999; 61: 225–233.

74. Hofman-Bang C, Lisspers J, Nordlander R, et al. Two-year results of a controlled study of residential rehabilitation for patients treated with percutaneous transluminal coronary angioplasty. A randomized study of a multifactorial programme. *European heart journal* 1999; 20: 1465–1474.
75. Dugmore LD, Tipson RJ, Phillips MH, et al. Changes in cardiorespiratory fitness, psychological wellbeing, quality of life, and vocational status following a 12 month cardiac exercise rehabilitation programme. *Heart (British Cardiac Society)* 1999; 81: 359–366.
76. Bethell HJN, Turner SC and Mullee MA. Cardiac rehabilitation in the community: 11 year follow-up after a randomized controlled trial. *Coronary Health Care* 1999; 3: 183–188.
77. Wallner S, Watzinger N, Lindschinger M, et al. Effects of intensified lifestyle modification on the need for further revascularization after coronary angioplasty (1999, accessed (Wallner, Watzinger, Lindschinger, Smolle, Toplak, Eber, Dittrich, Klein, Krejs, Wascher) Karl-Franzens University, Graz, Austria29).
78. van Dixhoorn JJ and Duivenvoorden HJ. Effect of relaxation therapy on cardiac events after myocardial infarction: a 5-year follow-up study. *Journal of cardiopulmonary rehabilitation* 1999; 19: 178–185.
79. Takahashi H, Saitoh S, Takagi S, et al. [Prognosis predictor of chronic-stage acute myocardial infarction]. *Nihon Ronen Igakkai zasshi. Japanese journal of geriatrics* 1999; 36: 721–729.
80. Allison TG, Farkouh ME, Smars PA, et al. Management of coronary risk factors by registered nurses versus usual care in patients with unstable angina pectoris (a chest pain evaluation in the emergency room [CHEER] substudy). *The American journal of cardiology* 2000; 86: 133–138.
81. Epstein AM and Goss R. Cardiac rehabilitation after CABG surgery - Effects on health status outcomes. *J. Invest. Med.* 2000; 48: 66A-66A.
82. Goss JR, Epstein A and Maynard C. Effects of cardiac rehabilitation on self-reported health status after coronary artery bypass surgery. *Journal of cardiopulmonary rehabilitation* 2002; 22: 410–417.
83. Fridlund B. Self-rated health in women after their first myocardial infarction: a 12-month comparison between participation and nonparticipation in a cardiac rehabilitation programme. *Health care for women international* 2000; 21: 727–738.



84. Hata R, Motohara S, Tuji T, et al. Beneficial effects of comprehensive cardiac rehabilitation and exercise training programs on ventricular arrhythmia in patients with post myocardial infarction. *Circulation* 2000; 102: 822.
85. Naughton J, Dorn J and Imamura D. Outcomes measurement in cardiac rehabilitation: the National Exercise and Heart Disease Project. *Journal of Rehabilitation Outcomes Measurement* 2000; 4: 64–75.
86. Pater C, Ditlef Jacobsen C, Rollag A, et al. Design of a randomized controlled trial of comprehensive rehabilitation in patients with myocardial infarction, stabilized acute coronary syndrome, percutaneous transluminal coronary angioplasty or coronary artery bypass grafting: Akershus Comprehensive Cardiac Rehabilitation Trial (the CORE Study). *Current controlled trials in cardiovascular medicine* 2000; 1: 177–183.
87. Steffen-Batey L, Nichaman MZ, Goff DC, et al. Change in level of physical activity and risk of all-cause mortality or reinfarction - The Corpus Christi Heart Project. *Circulation* 2000; 102: 2204–2209.
88. Toobert DJ, Glasgow RE and Radcliffe JL. Physiologic and related behavioral outcomes from the Women's Lifestyle Heart Trial. *Annals of behavioral medicine a publication of the Society of Behavioral Medicine* 2000; 22: 1–9.
89. Baessler A, Hengstenberg C, Holmer S, et al. Long-term effects of in-hospital cardiac rehabilitation on the cardiac risk profile. A case-control study in pairs of siblings with myocardial infarction. *European heart journal* 2001; 22: 1111–1118.
90. Belardinelli R, Paolini I, Cianci G, et al. Exercise training intervention after coronary angioplasty: the ETICA trial. *Journal of the American College of Cardiology* 2001; 37: 1891–1900.
91. Denollet J and Brutsaert DL. Reducing emotional distress improves prognosis in coronary heart disease: 9-year mortality in a clinical trial of rehabilitation. *Circulation* 2001; 104: 2018–2023.
92. Fonarow GC, Gawlinski A, Moughrabi S, et al. Improved treatment of coronary heart disease by implementation of a Cardiac Hospitalization Atherosclerosis Management Program (CHAMP). *The American journal of cardiology* 2001; 87: 819–822.
93. Hedback B, Perk J, Hornblad M, et al. Cardiac rehabilitation after coronary artery bypass surgery: 10-year results on mortality, morbidity and readmissions to hospital. *Journal of cardiovascular risk* 2001; 8: 153–158.

94. Higgins HC, Hayes RL and McKenna KT. Rehabilitation outcomes following percutaneous coronary interventions (PCI). *Patient education and counseling* 2001; 43: 219–230.
95. Whellan DJ, Shaw LK, Bart BA, et al. Cardiac rehabilitation and survival in patients with left ventricular systolic dysfunction. *American heart journal* 2001; 142: 160–166.
96. Sharma R and McLeod AA. Cardiac rehabilitation after coronary artery bypass graft surgery: Its effect on ischaemia, functional capacity, and a multivariate index of prognosis (2001, accessed (Sharma, McLeod) Poole Hospital NHS Trust, Poole, Dorset, United Kingdom5).
97. Buchwalsky G, Buchwalsky R and Held K. [Long-term effects of rehabilitation of an outpatient "heart group". A case control study]. *Zeitschrift fur Kardiologie* 2002; 91: 139–146.
98. Desmarais PL. *Q wave versus non-Q wave myocardial infarction after cardiac rehabilitation: morbidity and mortality*, University of Massachusetts Lowell, 2002.
99. Hall JP, Wiseman VL, King MT, et al. Economic evaluation of a randomised trial of early return to normal activities versus cardiac rehabilitation after acute myocardial infarction. *Heart, lung & circulation* 2002; 11: 10–18.
100. Kavanagh T, Mertens DJ, Hamm LF, et al. Prediction of long-term prognosis in 12 169 men referred for cardiac rehabilitation. *Circulation* 2002; 106: 666–671.
101. La Rovere MT, Bersano C, Gnemmi M, et al. Exercise-induced increase in baroreflex sensitivity predicts improved prognosis after myocardial infarction (2002, accessed (La Rovere, Bersano, Gnemmi, Specchia, Schwartz) Department of Cardiology, Policlinico S Matteo IRCCS, V le Golgi, 19, 27100 Pavia, Italy106).
102. Oldridge N, Perkins A, Marchionni N, et al. Number needed to treat in cardiac rehabilitation. *Journal of cardiopulmonary rehabilitation* 2002; 22: 22–30.
103. Warren TF. *Socioeconomic status, gender, and social support as predictors of mortality 10 years after cardiac rehabilitation*, Massachusetts School of Professional Psychology, 2002.
104. Winberg B and Fridlund B. Self-reported behavioural and medical changes in women after their first myocardial infarction: a 4-year comparison between participation and non-participation in a cardiac rehabilitation programme. *European journal of cardiovascular nursing journal of the Working Group on Cardiovascular Nursing of the European Society of Cardiology* 2002; 1: 101–107.

105. Wright DJ, Williams SG, Riley R, et al. Is early, low level, short term exercise cardiac rehabilitation following coronary bypass surgery beneficial?: A randomised controlled trial. *Heart (British Cardiac Society)* 2002; 88: 83–84.
106. Afrasiabi A, Toofan M, Pirzad L, et al. The effects of cardiac rehabilitation in patients with coronary artery disease. *Saudi medical journal* 2003; 24: 1145–1148.
107. Aldana SG, Whitmer WR, Greenlaw R, et al. Cardiovascular risk reductions associated with aggressive lifestyle modification and cardiac rehabilitation. *Heart & lung the journal of critical care* 2003; 32: 374–382.
108. Chiashi K. Clinical significance of long-term exercise in ischemic heart disease patients (2003, accessed (Chiashi) Department of Cardiovascular Surgery, School of Medicine, Toho University, 2-17-6 Ohashi, Meguro-ku, Tokyo 153-8515, Japan50).
109. Frenn M. The benefits of nurse led secondary prevention clinics for coronary heart disease continued after 4 years. *Evidence Based Nursing* 2003; 6: 123.
110. ISRCTN72884263. *The Birmingham Rehabilitation Uptake Maximisation Study (BRUM). Home-based versus hospital-based cardiac rehabilitation in a multi-ethnic population: cost-effectiveness and patient adherence.*
111. Johansen S, Baumbach LA, Jorgensen T, et al. [The effect of psychosocial rehabilitation after acute myocardial infarction. A randomized controlled trial]. *Ugeskrift for laeger* 2003; 165: 3229–3233.
112. Marchionni N, Fattiroli F, Fumagalli S, et al. Improved exercise tolerance and quality of life with cardiac rehabilitation of older patients after myocardial infarction: results of a randomized, controlled trial. *Circulation* 2003; 107: 2201–2206.
113. Murchie P, Campbell NC, Ritchie LD, et al. Secondary prevention clinics for coronary heart disease: four year follow up of a randomised controlled trial in primary care. *BMJ (Clinical research ed.)* 2003; 326: 84.
114. Pasquali SK, Alexander KP, Coombs LP, et al. Effect of cardiac rehabilitation on functional outcomes after coronary revascularization (2003, accessed (Pasquali, Alexander, Coombs, Lytle, Peterson) Outcomes Res. and Assessment Group, Duke Clinical Research Institute, Durham, NC, United States145).
115. Sundin O, Lisspers J, Hofman-Bang C, et al. Comparing multifactorial lifestyle interventions and stress management in coronary risk reduction. *International journal of behavioral medicine* 2003; 10: 191–204.

116. Vitcenda M. The Wisconsin outcomes experience: Baseline outcomes of the WISCVPR web-based outcomes project (2003, accessed (Vitcenda) Univ. of Wisconsin Hospital/Clinics, Madison, WI, United States<sup>23</sup>).
117. Otterstad JE and Group VHS. Influence on lifestyle measures and five-year coronary risk by a comprehensive lifestyle intervention programme in patients with coronary heart disease. *European journal of cardiovascular prevention and rehabilitation official journal of the European Society of Cardiology, Working Groups on Epidemiology & Prevention and Cardiac Rehabilitation and Exercise Physiology* 2003; 10: 429–437.
118. Young W, Rewa G, Goodman SG, et al. Evaluation of a community-based inner-city disease management program for postmyocardial infarction patients: a randomized controlled trial. *CMAJ Canadian Medical Association journal = journal de l'Association medicale canadienne* 2003; 169: 905–910.
119. Ballegaard S, Borg E, Karpatschhof B, et al. Long-term effects of integrated rehabilitation in patients with advanced angina pectoris: a nonrandomized comparative study. *Journal of alternative and complementary medicine (New York, N.Y.)* 2004; 10: 777–783.
120. Hambrecht R, Walther C, Mobius-Winkler S, et al. Percutaneous coronary angioplasty compared with exercise training in patients with stable coronary artery disease: a randomized trial. *Circulation* 2004; 109: 1371–1378.
121. ISRCTN74601515. *Short-term and long-term effect of a DANish hospital based comprehensive cardiac REHABilitation programme (The DANREHAB study)*.
122. Jiang X. *The effect of a nurse-led cardiac rehabilitation programme on patients with coronary heart disease in Chengdu, China*, Hong Kong Polytechnic University (People's Republic of China), 2004.
123. Kotseva K, Wood DA, Bacquer D de, et al. Cardiac rehabilitation for coronary patients: lifestyle, risk factor and therapeutic management. Results from the EUROASPIRE II survey. *Eur. Heart J. Suppl.* 2004; 6: J17-J26.
124. Murchie P, Campbell NC, Ritchie LD, et al. Effects of secondary prevention clinics on health status in patients with coronary heart disease: 4 year follow-up of a randomized trial in primary care. *Family practice* 2004; 21: 567–574.
125. Piestrzeniewicz K, Navarro-Kuczborska N, Bolinska H, et al. [The impact of comprehensive cardiac rehabilitation in patients up to 55 years old after acute

- myocardial infarction treated with primary coronary intervention]. *Polskie Archiwum Medycyny Wewnętrznej* 2004; 111: 309–317.
126. Sundararajan V, Bunker SJ, Begg S, et al. Attendance rates and outcomes of cardiac rehabilitation in Victoria, 1998. *The Medical journal of Australia* 2004; 180: 268–271.
127. Witt BJ, Jacobsen SJ, Weston SA, et al. Cardiac rehabilitation after myocardial infarction in the community (2004, accessed (Witt, Allison, Reeder, Roger) Divisions Cardiovasc. Dis. Int. Med., Rochester, Minnesota, USA44).
128. Yu CM, Lau CP, Chau J, et al. A short course of cardiac rehabilitation program is highly cost effective in improving long-term quality of life in patients with recent myocardial infarction or percutaneous coronary intervention. *Archives of physical medicine and rehabilitation* 2004; 85: 1915–1922.
129. Austin J, Williams R, Ross L, et al. Randomised controlled trial of cardiac rehabilitation in elderly patients with heart failure. *European journal of heart failure* 2005; 7: 411–417.
130. Briffa TG, Eckermann SD, Griffiths AD, et al. Cost-effectiveness of rehabilitation after an acute coronary event: a randomised controlled trial. *The Medical journal of Australia* 2005; 183: 450–455.
131. Dendale P, Berger J, Hansen D, et al. Cardiac rehabilitation reduces the rate of major adverse cardiac events after percutaneous coronary intervention (2005, accessed (Dendale, Berger, Hansen, Vaes) Rehabilitation and Health Centre, Virga Jesse Hospital, Hasselt, Belgium4).
132. Lisspers J, Sundin O, Ohman A, et al. Long-term effects of lifestyle behavior change in coronary artery disease: effects on recurrent coronary events after percutaneous coronary intervention. *Health psychology official journal of the Division of Health Psychology, American Psychological Association* 2005; 24: 41–48.
133. Maroto Montero JM, Artigao Ramirez R, Morales Duran MD, et al. [Cardiac rehabilitation in patients with myocardial infarction: a 10-year follow-up study]. *Revista espanola de cardiologia* 2005; 58: 1181–1187.
134. Raftery JP, Yao GL, Murchie P, et al. Cost effectiveness of nurse led secondary prevention clinics for coronary heart disease in primary care: follow up of a randomised controlled trial. *BMJ* 2005; 330: 707.
135. Sinclair AJ, Conroy SP, Davies M, et al. Post-discharge home-based support for older cardiac patients: a randomised controlled trial. *Age and ageing* 2005; 34: 338–343.

136. Zwisler AD, Schou L, Soja AM, et al. A randomized clinical trial of hospital-based, comprehensive cardiac rehabilitation versus usual care for patients with congestive heart failure, ischemic heart disease, or high risk of ischemic heart disease (the DANREHAB trial)--design, intervention, and population. *American heart journal* 2005; 150: 899.
137. Zwisler AD, Soja AM, Rasmussen S, et al. Hospital-based comprehensive cardiac rehabilitation versus usual care among patients with congestive heart failure, ischemic heart disease, or high risk of ischemic heart disease: 12-month results of a randomized clinical trial. *American heart journal* 2008; 155: 1106–1113.
138. Bhaskaran A, Siegel RM, Sargent T, et al. Impact of cardiac rehabilitation on the clinical course of coronary heart disease in post-CABG women. *Eur. Heart J.* 2006; 27: 254.
139. Herdy AH, Villa A, Marcchi PL, et al. In-hospital preoperative and postoperative cardiopulmonary rehabilitation improve outcomes after coronary artery bypass surgery: a randomized controlled trial. *Eur. Heart J.* 2006; 27: 444.
140. Kappagoda CT, Ma A, Cort DA, et al. Cardiac event rate in a lifestyle modification program for patients with chronic coronary artery disease. *Clinical cardiology* 2006; 29: 317–321.
141. Kovoov P, Lee AK, Carrozzi F, et al. Return to full normal activities including work at two weeks after acute myocardial infarction. *The American journal of cardiology* 2006; 97: 952–958.
142. Lear SA, Spinelli JJ, Linden W, et al. The Extensive Lifestyle Management Intervention (ELMI) after cardiac rehabilitation: a 4-year randomized controlled trial. *American heart journal* 2006; 152: 333–339.
143. Soerensen C, Mortensen OS, Olsen LF, et al. Impact of cardiac rehabilitation on three-year mortality after STEMI. *Eur. Heart J.* 2006; 27: 445.
144. Viswanathan K, Artis N, Bailey K, et al. Referral for cardiac rehabilitation after acute coronary syndrome reduces long-term mortality. *Eur. Heart J.* 2006; 27: 590–591.
145. Zhang YM and Sun HX. Influence of early rehabilitative exercise in patients with myocardial infarction (2006, accessed (Zhang, Sun) Department of Neurology, Beijing Tiantan Hospital, Capital University of Medical Sciences, Beijing 100050, China10).
146. Carroll DL, Rankin SH and Cooper BA. The effects of a collaborative peer advisor/advanced practice nurse intervention: cardiac rehabilitation participation and

- rehospitalization in older adults after a cardiac event. *The Journal of cardiovascular nursing* 2007; 22: 313–319.
147. Hua ST, Hsu CL, Kau LY, et al. The cost-effectiveness analysis of phase II cardiac rehabilitation in patients underwent CABG surgery. *Int. J. Cardiol.* 2007; 122: 117.
148. Jiang X, Sit JW and Wong TK. A nurse-led cardiac rehabilitation programme improves health behaviours and cardiac physiological risk parameters: evidence from Chengdu, China. *Journal of clinical nursing* 2007; 16: 1886–1897.
149. Macchi C, Fattirolli F, Lova RM, et al. Early and late rehabilitation and physical training in elderly patients after cardiac surgery. *American journal of physical medicine & rehabilitation / Association of Academic Physiatrists* 2007; 86: 826–834.
150. Merenich JA, Olson KL, Delate T, et al. Mortality reduction benefits of a comprehensive cardiac care program for patients with occlusive coronary artery disease. *Pharmacotherapy* 2007; 27: 1370–1378.
151. Suaya JA, Shepard DS, Normand SL, et al. Use of cardiac rehabilitation by Medicare beneficiaries after myocardial infarction or coronary bypass surgery. *Circulation* 2007; 116: 1653–1662.
152. Batista IBI, Fernandez HFH, Berro MBM, et al. Impact of a supervised exercise rehabilitation program on secondary prevention goals after acute coronary syndromes. *Circulation* 2008; 118: E267-E267.
153. Canyon S and Meshgin N. Cardiac rehabilitation: reducing hospital readmissions through community based programs. *Australian Family Physician* 2008; 37: 575–577.
154. Delaney EK, Murchie P, Lee AJ, et al. Secondary prevention clinics for coronary heart disease: a 10-year follow-up of a randomised controlled trial in primary care. *Heart (British Cardiac Society)* 2008; 94: 1419–1423.
155. Dendale P, Hansen D, Berger J, et al. Long-term cost-benefit ratio of cardiac rehabilitation after percutaneous coronary intervention. *Acta cardiologica* 2008; 63: 451–456.
156. Giannuzzi P, Temporelli PL, Marchioli R, et al. Global secondary prevention strategies to limit event recurrence after myocardial infarction: results of the GOSPEL study, a multicenter, randomized controlled trial from the Italian Cardiac Rehabilitation Network. *Archives of internal medicine* 2008; 168: 2194–2204.

157. Herdy AH, Marcchi PL, Vila A, et al. Pre- and postoperative cardiopulmonary rehabilitation in hospitalized patients undergoing coronary artery bypass surgery: a randomized controlled trial. *American journal of physical medicine & rehabilitation / Association of Academic Physiatrists* 2008; 87: 714–719.
158. Huang Y, Zhang R, Culler SD, et al. Costs and effectiveness of cardiac rehabilitation for dialysis patients following coronary bypass. *Kidney international* 2008; 74: 1079–1084.
159. Kummel M, Vahlberg T, Ojanlatva A, et al. Effects of an intervention on health behaviors of older coronary artery bypass (CAB) patients. *Archives of gerontology and geriatrics* 2008; 46: 227–244.
160. Naser A, Shahamfar J, Kumar GV, et al. *Cardiac risk factor changes through an intensive multifactorial life style modification program in CHD patients: Journal of Biological Sciences*; 8(2): 248–257.
161. Silva R, Pellanda L, Portal V, et al. Transdisciplinary approach to the follow-up of patients after myocardial infarction. *Clinics* 2008/00PY - 2008; 63: 489–496.
162. Cortes OL, Villar JC, Devereaux PJ, et al. Early mobilisation for patients following acute myocardial infarction: a systematic review and meta-analysis of experimental studies. *International journal of nursing studies* 2009; 46: 1496–1504.
163. Edstrom-Pluss C, Billing E, Held C, et al. Long-term beneficial effects of an expanded cardiac rehabilitation after an acute myocardial infarction or coronary artery by-pass grafting: A five year follow-up of a randomized controlled study (2009, accessed (Edstrom-Pluss, Henriksson, Kiessling, Rydell Karlsson, Wallen) Karolinska Institutet, Dept of Clinical Sciences, Danderyd Hospital, Stockholm, Sweden30).
164. Giallauria F, Lucci R, D'Agostino M, et al. Two-year multicomprehensive secondary prevention program: favorable effects on cardiovascular functional capacity and coronary risk profile after acute myocardial infarction. *Journal of cardiovascular medicine (Hagerstown, Md.)* 2009; 10: 772–780.
165. Jolly K, Lip GY, Taylor RS, et al. The Birmingham Rehabilitation Uptake Maximisation study (BRUM): a randomised controlled trial comparing home-based with centre-based cardiac rehabilitation. *Heart (British Cardiac Society)* 2009; 95: 36–42.
166. King M, Lichtman S and Dittmer J. Descriptive analysis of post acute inpatient cardiac rehabilitation in an inpatient rehabilitation facility (2009, accessed 29).



167. Lafitte M, Pradeau V, Leroux L, et al. Efficacy over time of a short overall atherosclerosis management programme on the reduction of cardiovascular risk in patients after an acute coronary syndrome. *Archives of cardiovascular diseases* 2009; 102: 51–58.
168. Hammill BG, Curtis LH, Schulman KA, et al. Relationship Between Cardiac Rehabilitation and Long-Term Risks of Death and Myocardial Infarction Among Elderly Medicare Beneficiaries. *Circulation* 2010; 121: 63–70.
169. Hansen D, Dendale P, Raskin A, et al. Long-term effect of rehabilitation in coronary artery disease patients: randomized clinical trial of the impact of exercise volume. *Clinical rehabilitation* 2010; 24: 319–327.
170. NCT01075867. *Multi-dimensional Prevention Program After Acute Coronary Syndrome (ELIPS) (SPUM-ACS- SP1)*.
171. Onishi T, Shimada K, Sato H, et al. Effects of phase III cardiac rehabilitation on mortality and cardiovascular events in elderly patients with stable coronary artery disease. *Circulation journal official journal of the Japanese Circulation Society* 2010; 74: 709–714.
172. Silberman A, Banthia R, Estay IS, et al. The effectiveness and efficacy of an intensive cardiac rehabilitation program in 24 sites. *American journal of health promotion AJHP* 2010; 24: 260–266.
173. Soga Y, Yokoi H, Ando K, et al. Safety of early exercise training after elective coronary stenting in patients with stable coronary artery disease. *European journal of cardiovascular prevention and rehabilitation official journal of the European Society of Cardiology, Working Groups on Epidemiology & Prevention and Cardiac Rehabilitation and Exercise Physiology* 2010; 17: 230–234.
174. Boyden TF, Reid KJ, Buchanan DM, et al. Association between cardiac rehabilitation and mortality and rehospitalization following acute myocardial infarction (2011, accessed (Boyden, Rubenfire) Internal Medicine, Univ. of Michigan, Ann Arbor, MI, United States124).
175. Doll JA, Hellkamp A, Thomas L, et al. Effectiveness of cardiac rehabilitation among older patients after acute myocardial infarction. *American Heart Journal* 2015; 170: 855–864.

176. Gulliksson M, Burell G, Vessby B, et al. Randomized controlled trial of cognitive behavioral therapy vs standard treatment to prevent recurrent cardiovascular events in patients with coronary heart disease: Secondary Prevention in Uppsala Primary Health Care project (SUPRIM). *Archives of internal medicine* 2011; 171: 134–140.
177. JPRN-UMIN000005177. *Japanese prospective multicenter study on outpatient cardiac rehabilitation after the percutaneous coronary intervention*.
178. Lam G, Snow R, Shaffer L, et al. The effect of a comprehensive cardiac rehabilitation program on 60-day hospital readmissions after an acute myocardial infarction (2011, accessed (Lam, Snow, Shaffer, La Londe, Spencer, Caulin-Glaser) McConnell Heart Health Center, OhioHealth, Columbus, OH, United States57).
179. Lewinter C, Bland JMB, Crouch SC, et al. Temporal evaluation (1995-2003) of referral and long-term survival from cardiac rehabilitation for acute myocardial infarction (2011, accessed (Lewinter, Bland, Crouch, Lewin) University of York, York, United Kingdom32).
180. Lewinter C, Bland JM, Crouch S, et al. The effect of referral for cardiac rehabilitation on survival following acute myocardial infarction: a comparison survival in two cohorts collected in 1995 and 2003. *European journal of preventive cardiology* 2012.
181. Milani RV, Lavie CJ, Mehra MR, et al. Impact of Exercise Training and Depression on Survival in Heart Failure Due to Coronary Heart Disease. *Am. J. Cardiol.* 2011; 107: 64–68.
182. Moreno-Palanco MA, Ibanez-Sanz P, Ciria-de Pablo C, et al. Impact of comprehensive and intensive treatment of risk factors concerning cardiovascular mortality in secondary prevention: MIRVAS Study. *Revista espanola de cardiologia* 2011; 64: 179–185.
183. Piso B, Tuchler H, Gyimesi M, et al. [Outpatient cardiac phase III rehabilitation at a Viennese institution - retrospective cohort study]. *Wiener medizinische Wochenschrift (1946)* 2011; 161: 263–271.
184. Pluss CE, Billing E, Held C, et al. Long-term effects of an expanded cardiac rehabilitation programme after myocardial infarction or coronary artery bypass surgery: a five-year follow-up of a randomized controlled study. *Clinical rehabilitation* 2011; 25: 79–87.
185. Soga Y, Yokoi H, Amemiya K, et al. Safety and efficacy of exercise training after coronary stenting in patients with stable coronary artery disease. *Circulation journal official journal of the Japanese Circulation Society* 2011; 75: 2379–2386.

186. Armstrong MJ, Sigal RJ, Hauer TL, et al. Cardiac rehabilitation completion is associated with reduced mortality in diabetic subjects with coronary artery disease (2012, accessed (Armstrong, Sigal, Martin) Medicine, Univ of Calgary, Calgary, Canada126).
187. Armstrong MJ, Sigal RJ, Hauer TL, et al. *Cardiac rehabilitation completion is associated with reduced mortality in diabetic subjects with coronary artery disease*: Am Heart Assoc.
188. Franklin BA. 2012 - Multifactorial cardiac rehabilitation did not reduce mortality or morbidity after acute myocardial infarction. *ACP Journal Club* 2012; 156: 1.
189. Ghroubi S, Elleuch W, Abid L, et al. The effects of cardiovascular rehabilitation after coronary stenting, Apport de la readaptation cardiovasculaire dans les suites d'une angioplastie transluminale (2012, accessed (Ghroubi, Elleuch, Elleuch) Unite de Recherche de l'Evaluation des Pathologies de l'Appareil Locomoteur 04/UR/08-07, Service de Medecine Physique et Reeducation Fonctionnelle, Universite de Sfax, CHU Habib Borguiba, Sfax 3000, Tunisia55).
190. Iliou MC, Andr R, Vedrenn G, et al. Cardiac rehabilitation and long-term outcome after myocardial infarction. Real-world data from the french FAST-MI 2005 registry (2012, accessed (Iliou) Cardiology, Hopital Corentin Celton, Issy les Moulineaux, France126).
191. Pouche M, Ruidavets JB, Iliou MC, et al. Cardiac rehabilitation and five-year mortality after an acute coronary syndrome: The 2005 French FAST-MI registry. *Eur. Heart J.* 2013; 34: 657–658.
192. Pouche M, Ruidavets JB, Ferrieres J, et al. Cardiac rehabilitation and 5-year mortality after acute coronary syndromes: The 2005 French FAST-MI study. *Archives of cardiovascular diseases* 2016; 109: 178–187.
193. Kubilius R, Jasiukeviciene L, Grizas V, et al. The impact of complex cardiac rehabilitation on manifestation of risk factors in patients with coronary heart disease. *Medicina (Kaunas, Lithuania)* 2012; 48: 166–173.
194. Mayer-Beger W, Simic D, Mahmoodzad J, et al. Efficacy of a long-term secondary prevention programme following inpatient cardiovascular rehabilitation on risk and health-related quality of life in a low-education cohort: a randomized controlled study. *European journal of preventive cardiology* 2012.

195. Naranjo-Estupinan NF, Diaz-Quijano FA and Garcia RG. The influence of cardiac rehabilitation on acute myocardial infarction patients' readmission rate in Santander, Colombia. [Spanish]. *Revista de salud publica (Bogota, Colombia)* 2012; 14: 831–841.
196. Ou HT and Balkrishnan R. Cost-effectiveness of cardiac rehabilitation program on patient medication adherence and hospitalization in medicaid population with acute myocardial infarction (2012, accessed (Ou) South Dakota State University, Sioux Falls, SD, United States15).
197. Parashar S, Spertus JA, Tang F, et al. Predictors of early and late enrollment in cardiac rehabilitation, among those referred, after acute myocardial infarction. *Circulation* 2012; 126: 1587–1595.
198. Rangel I, Rocha A, Sousa C, et al. Compliance to a cardiac rehabilitation program: What benefits and prognosis impact? (2012, accessed (Rangel, Rocha, Sousa, Sousa, Correia, Paiva, Ribeiro, Melao, Parada-Pereira, Maciel) Sao Joao Hospital, Porto, Portugal11).
199. Rideout A, Lindsay G and Godwin J. Patient mortality in the 12 years following enrolment into a pre-surgical cardiac rehabilitation programme. *Clinical rehabilitation* 2012; 26: 642–647.
200. Suzuki T, Kohro T, Hayashi D, et al. Frequency and impact of lifestyle modification in patients with coronary artery disease: The Japanese Coronary Artery Disease (JCAD) Study. *Am. Heart J.* 2012; 163: 268–273.
201. Carrington MJ, Chan Y-K, Calderone A, et al. A multicenter, randomized trial of a nurse-led, home-based intervention for optimal secondary cardiac prevention suggests some benefits for men but not for women. *Circulation. Cardiovascular quality and outcomes* 2013; 6: 379–389.
202. Gambogi R, Baldizzoni M, Saona G, et al. effectiveness of a secondary cardiovascular prevention program in Uruguay: p318. *European Journal of Preventive Cardiology* 2013; 20: S47.
203. Hung RK, Al-Mallah MH, Whelton SP, et al. *High Exercise Capacity Attenuates Mortality Risk Associated With Unrevascularized and Revascularized Coronary Artery Disease: The FIT Project*: Am Heart Assoc.
204. Jorstad HT, Birgelen C von, Alings AMW, et al. Effect of a nurse-coordinated prevention programme on cardiovascular risk after an acute coronary syndrome: main

- results of the RESPONSE randomised trial. *Heart (British Cardiac Society)* 2013; 99: 1421–1430.
205. Kotseva K, Wood D, Backer G de, et al. Use and effects of cardiac rehabilitation in patients with coronary heart disease: results from the EUROASPIRE III survey. *European Journal of Preventive Cardiology* 2013; 20: 817–826.
206. Lear SA, Singer J, Banner-Lukaris D, et al. Randomized trial of a virtual cardiac rehabilitation program delivered at a distance via the Internet. *Circulation. Cardiovascular quality and outcomes* 2014; 7: 952–959.
207. Longobardi G, Furgi G, Mazzella F, et al. protective effect on mortality of physical exercise in adult and elderly patient with cardiovascular disease: p185. *European Journal of Preventive Cardiology* 2013; 20: S35.
208. Martin BJ, Arena R, Haykowsky M, et al. Cardiovascular fitness and mortality after contemporary cardiac rehabilitation. *Mayo Clinic Proceedings* 2013; Mayo Clinic. 88: 455–463.
209. Meisinger C, Stollenwerk B, Kirchberger I, et al. *Effects of a nurse-based case management compared to usual care among aged patients with myocardial infarction: BMC geriatrics*; 13: 115.
210. Mudrick DW, Shaffer L, Lalonde M, et al. Cardiac rehabilitation participation reduces 90-day hospital readmissions after acute myocardial infarction or percutaneous coronary intervention (2013, accessed (Mudrick, Shaffer, Lalonde, Ruhil, Lam, Hickerson, Caulin-Glaser, Snow) McConnell Heart Health Center, Ohio Health, Columbus, OH, United States61).
211. Murphy BM, Worcester MU, Higgins RO, et al. Reduction in 2-year recurrent risk score and improved behavioral outcomes after participation in the "Beating Heart Problems" self-management program: results of a randomized controlled trial. *Journal of cardiopulmonary rehabilitation and prevention* 2013; 33: 220–228.
212. Naci H and Ioannidis JPA. Comparative effectiveness of exercise and drug interventions on mortality outcomes: metaepidemiological study. *BMJ-British Medical Journal* 2013; 347.
213. Panovsky R, Kukla P, Jancik J, et al. The prognostic effect of different types of cardiac rehabilitation in patients with coronary artery disease. *Acta cardiologica* 2013; 68: 575–581.

214. Russo N, Compostella L, E V, et al. Intensive, exercise based, cardiac rehabilitation immediately after an acute myocardial infarction in high risk patients: impact on immediate and long-term prognosis.
215. Santaularia N, Caminal J, Arnau A, et al. *Randomized clinical trial to evaluate the effect of a supervised exercise training program on readmissions in patients with myocardial ischemia: BMC cardiovascular disorders*; 13: 32.
216. Sobolev M, Prince DZ, Gao J, et al. Completion of cardiac rehabilitation reduces hospital admission rates in long term follow-up (2013, accessed (Sobolev, Prince, Gao, Taub) Montefiore Med Cntr, Bronx, NY, United States127).
217. Turkstra E, Hawkes AL, Oldenburg B, et al. Cost-effectiveness of a coronary heart disease secondary prevention program in patients with myocardial infarction: results from a randomised controlled trial (ProActive Heart). *BMC cardiovascular disorders* 2013; 13: 33.
218. Vervueren PL, Bongard V, Arveiler D, et al. Cardiovascular rehabilitation after a first acute coronary syndrome and the risk of recurrence and death in patients from the French MONICA registries. *Archives of Cardiovascular Diseases Supplements* 2013; 5 (1): 82.
219. ACTRN12614000284662. *The Central Australian Heart Protection Study: A Randomised Trial of Nurse-Led, Family Based Secondary Prevention of Acute Coronary Syndromes.*
220. Alter DA, Franklin B, Ko DT, et al. Socioeconomic status, functional recovery, and long-term mortality among patients surviving acute myocardial infarction. *PLoS ONE* 2014; 8: e65130.
221. Anderson LJ and Taylor RS. Cardiac rehabilitation for people with heart disease: an overview of Cochrane systematic reviews. *International journal of cardiology* 2014; 177: 348–361.
222. Cobo Gomez N, Romero Reyes MJ, Molano Casimiro FJ, et al. Impact of cardiac rehabilitation on mortality and cardiovascular events after percutaneous coronary intervention. In: *EUROPEAN HEART JOURNAL*, p. 57.
223. Dunlay SM, Pack QR, Thomas RJ, et al. Participation in cardiac rehabilitation, readmissions, and death after acute myocardial infarction. *The American journal of medicine* 2014; 127: 538–546.

224. Chulian EEO, Garcia FP, Millan SP, et al. effect of cardiac rehabilitation in the rate of cardiovascular events in patients with ischemic heart disease: p691. *European Journal of Preventive Cardiology* 2014; 21: S141.
225. Expósito-Tirado JA, Aguilera-Saborido A, López-Lozano AM, et al. Long-term total mortality and cardiovascular morbidity in patients with ischemic cardiac disease who completed a cardiac rehabilitation and secondary prevention program [Spanish]. *Rehabilitacion* 2014; 48: 210–218.
226. Kamath DY, Xavier D, Gupta R, et al. Rationale and design of a randomized controlled trial evaluating community health worker-based interventions for the secondary prevention of acute coronary syndromes in India (SPREAD). *American heart journal* 2014; 168: 690–697.
227. Karmali KN, Davies P, Taylor F, et al. Promoting patient uptake and adherence in cardiac rehabilitation. *Cochrane Database of Systematic Reviews* 2014; 2014: CD007131.
228. Kim SS, Lee S, Kim G, et al. Effects of a comprehensive cardiac rehabilitation program in patients with coronary heart disease in Korea. *Nursing & health sciences* 2014; 16: 476–482.
229. Kureshi F, Kennedy KF, Jones PG, et al. Association between cardiac rehabilitation participation and health status outcomes after acute myocardial infarction. *Circulation: Cardiovascular Quality and Outcomes* 2014; 7.
230. Lewinter C, Bland JM, Crouch S, et al. The effect of referral for cardiac rehabilitation on survival following acute myocardial infarction: A comparison survival in two cohorts collected in 1995 and 2003. *European Journal of Preventive Cardiology* 2014; 21: 163–171.
231. Lewinter C, Thygesen L, Doherty P, et al. Effectiveness of cardiac rehabilitation in HF patients: A long-term follow-up of the DANREHAB-trial. *European Journal of Heart Failure* 2014; 16: 60.
232. Lubinskaya E and Nikolaeva O. cost-effectiveness of 2-year comprehensive cardiac rehabilitation program after coronary bypass surgery: p399. *European Journal of Preventive Cardiology* 2014; 21: S74.
233. Martin BJ, Aggarwal S, Stone JA, et al. Cardiac rehabilitation improves outcomes in patients with acute heart failure post myocardial infarction: Analysis of a large, single-center cohort. *Experimental and Clinical Cardiology* 2014; 20: 2206–2237.

234. Maddison R, Rawstorn JC, Rolleston A, et al. The remote exercise monitoring trial for exercise-based cardiac rehabilitation (REMOTE-CR): a randomised controlled trial protocol. *BMC public health* 2014; 14: 1236.
235. Moreno AAR, Siles-rubio JR, Noureddine-lopez M, et al. compliance to a cardiac rehabilitation program provides benefits and prognosis impact: p522. *European Journal of Preventive Cardiology* 2014; 21: S104.
236. Santoalha JM, Amorim H, Cadilha R, et al. No. 4 Cardiac Rehabilitation Adherence as a Determinant of Cardiovascular Disease Burden After ACS. *PM&R* 2014; 8: S83-S84.
237. Sharma R, Norris C, Gyenes G, et al. IMPACT OF CARDIAC REHABILITATION ON SOUTH ASIANS: Results FROM THE ALBERTA PROVINCIAL PROJECT FOR OUTCOMES ASSESSMENT IN CORONARY HEART DISEASE (APPROACH) REGISTRY. *Canadian Journal of Cardiology* 2014; 30: S119-S120.
238. ACTRN12615001247561. *An evaluation of cardiac rehabilitation and secondary prevention uptake and utilisation for acute coronary syndrome patients.*
239. Ammendrup FD, Kristinsdottir MA, Gudmundsson G, et al. Effect of cardiac rehabilitation following coronary bypass surgery or other coronary interventions. [Icelandic]. *Laeknabladid* 2015; 101: 511–516.
240. Armstrong MJ, Sigal RJ, Arena R, et al. Cardiac rehabilitation completion is associated with reduced mortality in patients with diabetes and coronary artery disease. *Diabetologia* 2015; 58: 691–698.
241. Bubnova M, Aronov D, Krasnitsky V, et al. *Effectiveness of physical rehabilitation in hypertensive patients after acute myocardial infarction treated with primary coronary intervention: Journal of hypertension; 33: e136.*
242. Chen H, Liu C, Chen H, et al. *Efficiency of rehabilitation after acute myocardial infarction: The kaohsiung journal of medical sciences; 31(7): 351–357.*
243. Chew D, Astley C, Luker H, et al. *A cluster randomized trial of objective risk assessment versus standard care for acute coronary syndromes: American heart journal; 170(5): 995-1004.e1.*
244. Colbert JD, Martin BJ, Haykowsky MJ, et al. Cardiac rehabilitation referral, attendance and mortality in women. *European Journal of Preventive Cardiology* 2015; 22: 979–986.
245. Cobo Gomez N, Romero Reyes MJ, Picon Heras R, et al. Impact of a cardiac rehabilitation programme on mortality and cardiovascular events after a percutaneous



- coronary intervention in patients with multivessel disease and incomplete revascularization. *Eur. Heart J.* 2015; 36: 635.
246. Cobo Gomez NN, Mora Pardo JA, Picon Heras R, et al. Cardiac rehabilitation in heart failure with reduced left ventricular ejection fraction due to ischaemic cardiomyopathy: Effect on all-cause mortality and cardiac mortality. *European Journal of Heart Failure* 2015; 17: 355.
247. Coll-Fernandez R, Coll R, Munoz-Torrero JF, et al. Supervised versus non-supervised exercise in patients with recent myocardial infarction. A propensity analysis. *European journal of preventive cardiology* 2015.
248. Deljanin Ilic M, Ilic S, Simonovic D, et al. Prognostic value of endothelial parameters changes during cardiac rehabilitation on recurrent chest pain in patients with coronary artery disease: 30 months follow up. *Eur. Heart J.* 2015; 36: 637.
249. Gencer B, Carballo D, Auer R, et al. Effect of a multi-dimensional secondary prevention program on cardiovascular events in patients hospitalized with acute coronary syndromes: A multicentric Swiss prospective trial. *Eur. Heart J.* 2015; 36: 1202.
250. Goto Y, Nohara R, Daida H, et al. Japanese multicenter study on the prognostic efficacy of out-patient cardiac rehabilitation in patients with coronary artery disease: J-REHAB. *Circulation. Conference: American Heart Association's* 2015; 132.
251. Kadda O, Kotanidou A, Manginas A, et al. Lifestyle intervention and one-year prognosis of patients following open heart surgery: a randomised clinical trial. *Journal of clinical nursing* 2015; 24: 1611-1621 11p.
252. Kim HJ, Joo MC, Noh SE, et al. Long-Term Outcomes of Cardiac Rehabilitation in Diabetic and Non-diabetic Patients With Myocardial Infarction. *Annals of rehabilitation medicine* 2015; 39: 853–862.
253. Kirchberger I, Hunger M, Stollenwerk B, et al. *Effects of a 3-year nurse-based case management in aged patients with acute myocardial infarction on rehospitalisation, mortality, risk factors, physical functioning and mental health. a secondary analysis of the randomized controlled KORINNA study: Plos one*; 10(3): e0116693.
254. Klainman S, Yarmolovsky A and Fink G. Effect of cardiac rehabilitation following acute coronary syndrome on long term outcomes. *Cardiology (Switzerland)* 2015; 132: 113.

255. Landry M, Delos-Reyes F, Harvey P, et al. Long-term clinical effectiveness of a cardiac rehabilitation program designed for women: 6-month and 12-month post intervention follow-up review. *Canadian Journal of Cardiology* 2015; 1): S265.
256. McPhee PG, Winegard KJ, MacDonald MJ, et al. Importance of early cardiac rehabilitation on changes in exercise capacity: a retrospective pilot study. *Applied physiology, nutrition, and metabolism = Physiologie appliquee, nutrition et metabolisme* 2015; 40: 1314–1317.
257. Medina-Inojosa JR, Somers V, Ibarra MG, et al. Patient participation in cardiac rehabilitation and long-term cardiovascular events: A population-based study. *Circulation. Conference: American Heart Association's* 2015; 132.
258. NCT02584192. *Efficacy of Early Home-based Cardiac Rehabilitation Program for Patients After Acute Myocardial Infarction.*
259. Nishitani-Yokoyama M, Miyauchi K, Shimada K, et al. *Effects of phase II comprehensive cardiac rehabilitation on coronary plaque volume after acute coronary syndrome: International heart journal*; 56(6): 597–604.
260. NTR5306. *Effectiveness of currently available cardiac rehabilitation programmes from 8 European institutes in elderly patients.*
261. Romero Reyes MJ, Cobo Gomez N, Escane Duarte P, et al. Effectiveness of cardiac rehabilitation in patients with type 2 diabetes mellitus after percutaneous coronary intervention. *Eur. Heart J.* 2015; 36: 517.
262. Martinez MMS, Diaz SDP, Gonzalez-gallarza DR, et al. effects of cardiac rehabilitation in young patients after an acute coronary syndrome.: p460. *European Journal of Preventive Cardiology* 2015; 22: S94.
263. Vataman E, Grivenco A, Filimon S, et al. *Effect of long-term home based cardiac rehabilitation programme on readmission rate and mortality risk after coronary revascularization: European heart journal*; 36: 637.
264. Wang W, Jiang Y, He H, et al. *A randomised controlled trial on the effectiveness of a home-based self-management programme for community-dwelling patients with myocardial infarction: European journal of cardiovascular nursing*; 15(6): 398–408.
265. Andion Ogando R, Laherran Rodriguez E, Arias Valdes EM, et al. Cost effectiveness analysis of a cardiac rehabilitation program after an acute coronary syndrome. *European Heart Journal* 2016; 37 (Supplement 1): 623.

266. Andjic M, Spiroski D, Ilic Stojanovic O, et al. Effect of short-term exercise training in patients following acute myocardial infarction treated with primary percutaneous coronary intervention. *European journal of physical and rehabilitation medicine* 2016; 52: 364–369.
267. Ding R, Gao L, Zhu L, et al. To explore the efficacy and safety of tertiary hospital guided, community-driven family self-help cardiac rehabilitation model. *Circulation. Conference: American Heart Association's* 2016; 134.
268. Dong Z, Yu B, Zhang Q, et al. Early Rehabilitation Therapy Is Beneficial for Patients With Prolonged Mechanical Ventilation After Coronary Artery Bypass Surgery. *International heart journal* 2016; 57: 241–246.
269. Fukui S, Ogo T, Takaki H, et al. Efficacy of cardiac rehabilitation after balloon pulmonary angioplasty for chronic thromboembolic pulmonary hypertension. *Heart (British Cardiac Society)* 2016; 102: 1403–1409.
270. Gostoli S, Roncuzzi R, Urbinati S, et al. Unhealthy behaviour modification, psychological distress, and 1-year survival in cardiac rehabilitation. *British journal of health psychology* 2016; 21: 894–916.
271. Goto Y, Nakanishi M, Arakawa T, et al. Is active participation in cardiac rehabilitation associated with better long-term prognosis in patients after acute myocardial infarction even in the primary pci era? *Circulation. Conference: American Heart Association's* 2016; 134.
272. Hassan AM and El Nahas NG. Efficacy of cardiac rehabilitation after percutaneous coronary intervention. *International Journal of PharmTech Research* 2016; 9: 134–141.
273. Hirsch K, Bohley S, Mau W, et al. The RHESA-CARE study: an extended baseline survey of the regional myocardial infarction registry of Saxony-Anhalt (RHESA) design and objectives. *BMC cardiovascular disorders* 2016; 16: 159.
274. Hojskov IE, Moons P, Hansen NV, et al. Early physical training and psycho-educational intervention for patients undergoing coronary artery bypass grafting. The SheppHeart randomized 2 x 2 factorial clinical pilot trial. *European Journal of Cardiovascular Nursing* 2016; 15: 425–437.
275. Hou WH, Lai CH, Jeng C, et al. Cardiac Rehabilitation Prevents Recurrent Revascularization in Patients With Coronary Heart Disease: A POPULATION-BASED

- COHORT STUDY IN TAIWAN. *Journal of cardiopulmonary rehabilitation and prevention* 2016; 36: 250–257.
276. Huber D, Henriksson R, Jakobsson S, et al. Implementation of a telephone-based secondary preventive intervention after acute coronary syndrome (ACS): participation rate, reasons for non-participation and 1-year survival. *Trials* 2016; 17: 85.
277. Iles-Smith H, McGowan L, Campbell M, et al. Primary percutaneous coronary intervention patient experiences of cardiac rehabilitation. *European Journal of Cardiovascular Nursing* 2016; 15: S66.
278. JPRN-UMIN000021393. *Impact of comprehensive cardiac rehabilitation program on regression and stabilization of coronary plaque after acute coronary syndrome by coronary CT.*
279. Kikkenborg BS, Christensen A, Zwisler A, et al. Sick leave after first time ICD implantation: *European journal of cardiovascular nursing. Conference: euroheartcare 2016. Greece. Conference start: 20160415. Conference end: 20160416*; 15: S34-s35.
280. Kuo L-Y, Shen S-L, Hsu C-L, et al. Effect of cardiac rehabilitation on cardiovascular events after coronary artery bypass grafting in a 6-year follow-up study. *Health Science Journal* 2016; 10.
281. Kureshi F, Kennedy KF, Jones PG, et al. Association between cardiac rehabilitation participation and health status outcomes after acute myocardial infarction. *JAMA Cardiology* 2016; 1: 980–988.
282. Loprinzi PD and Addoh O. The Effects of Free-Living Physical Activity on Mortality After Coronary Artery Disease Diagnosis. *Clinical cardiology* 2016; 39: 165–169.
283. Mandic S, Stevens E, Hodge C, et al. Long-term effects of cardiac rehabilitation in elderly individuals with stable coronary artery disease. *Disability and rehabilitation* 2016; 38: 837–843.
284. Marcassa C, Giordano A and Giannuzzi P. Five-year hospitalisations and survival in patients admitted to inpatient cardiac rehabilitation after cardiac surgery. *European journal of preventive cardiology* 2016; 23: 1609–1617.
285. Nakayama A, Nagayama M, Komuro I, et al. The long-term cardiac rehabilitation improves the prognosis of patients with cardiovascular disease: The large cohort study of cardiac rehabilitation in tokyo (cart study). *Circulation. Conference: American Heart Association's* 2016; 134.

286. Nedkoff L, Knuiman M, Hung J, et al. Long-term all-cause and cardiovascular mortality following incident myocardial infarction in men and women with and without diabetes: Temporal trends from 1998 to 2009. *European journal of preventive cardiology* 2016; 23: 1273–1281.
287. Panovsky R, Kukla P, Jancik J, et al. The prognostic impact of different types of cardiac rehabilitation in patients with coronary artery disease. *European Journal of Preventive Cardiology* 2016; 23: S10.
288. Philippe F, Blin P, Laurendeau C, et al. Incidence of cardiovascular events following myocardial infarction in France: An observational analysis using a claims database. *Archives of Cardiovascular Diseases Supplements* 2016; 1): 19.
289. Pope M, Greenlaw N, Ford I, et al. Two year prognosis in stable coronary artery disease: A prospective study of 2346 patients in UK primary care. *Heart (British Cardiac Society)* 2016; 102: A58.
290. Reibis R, Salzwedel A, Buhlert H, et al. Impact of training methods and patient characteristics on exercise capacity in patients in cardiovascular rehabilitation. *European Journal of Preventive Cardiology* 2016; 23: 452–459.
291. Sabbag A, Chernomordik F, Goldenberg I, et al. Cardiac rehabilitation following acute myocardial infarction, trends in referral over the past decade, predictors of referral, and one-year mortality outcome in a multicenter national registry between 2006-2013. *Journal of the American College of Cardiology* 2016; 1): 1937.
292. Sharma R, Norris CM, Gyenes G, et al. Effect of Cardiac Rehabilitation on South Asian Individuals With Cardiovascular Disease: Results From the APPROACH Registry. *Canadian Journal of Cardiology* 2016; 32: S397-S402.
293. Silveira I, Sousa MJ, Brochado B, et al. Prognostic impact of cardiac rehabilitation program after STEMI. *European Heart Journal* 2016; 37 (Supplement 1): 542.
294. Sjolín I, Back M, Schiopu A, et al. Participation in exercise-based cardiac rehabilitation is associated with improved levels of risk factors in myocardial infarction survivors. *European Heart Journal* 2016; 37 (Supplement 1): 622.
295. Sunamura M, Ter Hoeve N, van Geffen ME, et al. 10-year mortality improvements after cardiac rehabilitation in ACS patients treated with primary percutaneous intervention. *European Heart Journal* 2016; 37 (Supplement 1): 644–645.

296. Taylor C, Tsakirides C, Moxon J, et al. Submaximal fitness and mortality risk reduction in coronary heart disease: a retrospective cohort study of community-based exercise rehabilitation. *BMJ open* 2016; 6: e011125.
297. van Halewijn G, Deckers J, Tay HY, et al. Challenges and opportunities for cardiac rehabilitation: A meta-analysis of hard outcomes from recent randomised trials 2010-2015. *European Heart Journal* 2016; 37 (Supplement 1): 645.
298. Varnfield M, Alcorn J, Parker S, et al. Translation of home-based m-health cardiac rehabilitation in real practice. *European Heart Journal* 2016; 37 (Supplement 1): 826–827.
299. Vibulchai N, Thanasilp S and Preechawong S. *Randomized controlled trial of a self-efficacy enhancement program for the cardiac rehabilitation of Thai patients with myocardial infarction: Nursing & health sciences*; 18(2): 188–195.
300. Xavier D, Gupta R, Kamath D, et al. Community health worker-based intervention for adherence to drugs and lifestyle change after acute coronary syndrome: a multicentre, open, randomised controlled trial. *The lancet. Diabetes & endocrinology* 2016; 4: 244–253.
301. Yuriy Dovgalyuk Y, Mishina IE, Jarchenkova LL, et al. Efficacy of phase two comprehensive cardiac rehabilitation program in patients after acute coronary syndrome. *European Journal of Preventive Cardiology* 2016; 23: S38.
302. Ades PA, Keteyian SJ, Wright JS, et al. Increasing Cardiac Rehabilitation Participation From 20% to 70%: A Road Map From the Million Hearts Cardiac Rehabilitation Collaborative. *Mayo Clinic Proceedings* 2017; 92: 234–242.
303. Almeida Morais L, Rio P, Aguiar-Rosa S, et al. Cardiac rehabilitation programs after acute coronary syndromes. A very long-term beneficial therapeutic option still neglected. *European Heart Journal* 2017; 38: 516.
304. Alrohaibani A, Harzand A, Zafari AM, et al. Cardiac rehabilitation is associated with lower rates of cardiac events amongst veterans. *Circulation* 2017; 136.
305. Alter DA, Yu B, Bajaj RR, et al. Relationship Between Cardiac Rehabilitation Participation and Health Service Expenditures Within a Universal Health Care System. *Mayo Clinic proceedings* 2017.
306. Biery D, Singh A, Collins B, et al. Cardiac rehabilitation in young adults following myocardial infarction is associated with better 1 year outcomes. *Circulation* 2017; 136.

307. Bravo-Escobar R, Gonzalez-Represas A, Gomez-Gonzalez AM, et al. Effectiveness and safety of a home-based cardiac rehabilitation programme of mixed surveillance in patients with ischemic heart disease at moderate cardiovascular risk: A randomised, controlled clinical trial. *BMC cardiovascular disorders* 2017; 17: 66.
308. Burazor I, Seferovic P, Dodic S, et al. Usefulness of exercised-based cardiac rehabilitation patients with left ventricle systolic dysfunction. *European Journal of Preventive Cardiology* 2017; 24 (1 Supplement 1): S102.
309. Chernomordik F, Sabbag A, Tzur B, et al. Cardiac rehabilitation following an acute coronary syndrome: Trends in referral, predictors and mortality outcome in a multicenter national registry between years 2006-2013: Report from the Working Group on Cardiac Rehabilitation, the Israeli Heart Society. *European journal of preventive cardiology* 2017; 24: 123–132.
310. Claes J, Buys R, Budts W, et al. Longer-term effects of home-based exercise interventions on exercise capacity and physical activity in coronary artery disease patients: A systematic review and meta-analysis. *European Journal of Preventive Cardiology* 2017; 24: 244–256.
311. CTRI/2017/03/008022. *A study to check the effects of cardiac rehabilitation program by the nurses involving patient teaching and counseling for the patients undergoing Angioplasty. It can help to reduce Blood Pressure, Body weight, Cholesterol levels, also help in quitting smoking and improving exercise among patients.*
312. Dabek J, Pyka E, Piotrkowicz J, et al. Impact of post-hospital cardiac rehabilitation on the quality of life of patients after surgical treatment for coronary artery disease. *Kardiochirurgia i torakochirurgia polska = Polish journal of cardio-thoracic surgery* 2017; 14: 120–126.
313. Dondo TB, Hall M, Timmis AD, et al. Excess mortality and guideline-indicated care following non-ST-elevation myocardial infarction. *European heart journal. Acute cardiovascular care* 2017; 6: 412–420.
314. Du L, Cheng Z, Zhang Y, et al. The impact of medication adherence on clinical outcomes of coronary artery disease: A meta-analysis. *European journal of preventive cardiology* 2017; 24: 962–970.

315. Ehrman JK, Keteyian SJ, Peterson E, et al. Weight change is not associated with risk of outcomes in heart failure: Secondary analysis of the HF-ACTION study. *Circulation* 2017; 136.
316. Fors A, Swedberg K, Ulin K, et al. Effects of person-centred care after an event of acute coronary syndrome: Two-year follow-up of a randomised controlled trial. *International journal of cardiology* 2017; 249: 42–47.
317. Frohmader TJ, Lin F and Chaboyer WP. Structures, processes and outcomes of the Aussie Heart Guide Program: A nurse mentor supported, home based cardiac rehabilitation program for rural patients with acute coronary syndrome. *Australian critical care official journal of the Confederation of Australian Critical Care Nurses* 2017.
318. Gabelhouse J, Eves N, Grace SL, et al. Traditional Versus Hybrid Outpatient Cardiac Rehabilitation: A COMPARISON OF PATIENT OUTCOMES. *Journal of cardiopulmonary rehabilitation and prevention* 2017.
319. Harun MR, Tiksnadi BB, Wahjoepramono NND, et al. Effect of phase II cardiac rehabilitation on improvement of functional capacity in post revascularization patients with metabolic syndrome. *European Heart Journal, Supplement* 2017; 19: E47.
320. Hoejskov I, Moons P, Hansen N, et al. *Early rehabilitation after coronary artery bypass grafting - Results from the SheppHeartCABG trial: European journal of preventive cardiology. Conference: europrevent 2017. Spain; 24(1 Supplement 1): S98.*
321. Ishida T, Miura SI, Fujimi K, et al. Significance of Cardiac Rehabilitation on Visit-to-Visit Variability of Blood Pressure in Patients With Cardiovascular Disease in a 12-Month Follow-Up. *Journal of clinical medicine research* 2017; 9: 345–352.
322. Jamal UJ. *Effects of cardiac rehabilitation on exercise capacity and WHO-quality of life undergoing CABG patients-A quasi-randomised controlled trial: European journal of heart failure. Conference: heart failure 2017 and the 4th world congress on acute heart failure. France; 19: 464.*
323. Kachur S, Chongthammakun V, Lavie CJ, et al. Impact of cardiac rehabilitation and exercise training programs in coronary heart disease. *Progress in cardiovascular diseases* 2017; 60: 103–114.
324. Khoury M, Stone J, Southern D, et al. Cardiac rehabilitation in premature coronary artery disease. *Circulation* 2017; 136.



325. Klein J, Farkash R, Raviv Abeles N, et al. Cardiac rehabilitation: Referral, participation, and mortality following elective PCI. *European Heart Journal* 2017; 38: 1032.
326. Kyuno E, Iso Y, Sasai M, et al. Exercise-based cardiac rehabilitation improved long-term outcome in ST-elevation myocardial infarction regardless of reperfusion time on admission. *Circulation* 2017; 136.
327. Larsen TR, McMunn J, Gohar S, et al. Utilization of cardiac rehabilitation in eligible medical cardiac patients. *Circulation. Conference: American Heart Association's Epidemiology and Prevention/Lifestyle and Cardiometabolic Health* 2017; 135.
328. Lee BJ, Go JY, Kim AR, et al. Quality of Life and Physical Ability Changes After Hospital-Based Cardiac Rehabilitation in Patients With Myocardial Infarction. *Annals of rehabilitation medicine* 2017; 41: 121–128.
329. Lloyd-Jones DM, Huffman MD, Karmali KN, et al. Estimating Longitudinal Risks and Benefits From Cardiovascular Preventive Therapies Among Medicare Patients: The Million Hearts Longitudinal ASCVD Risk Assessment Tool: A Special Report From the American Heart Association and American College of Cardiology. *Journal of the American College of Cardiology* 2017; 69: 1617–1636.
330. Ma J, Ge C, Shi Y, et al. Mobile phone-based cardiac rehabilitation program improves exercise capacity and clinical outcomes in Chinese revascularized patients. *Circulation* 2017; 136.
331. Marcos-Forniol E, Meco JF, Corbella E, et al. Secondary prevention programme of ischaemic heart disease in the elderly: A randomised clinical trial. *European journal of preventive cardiology* 2017: 2047487317742998.
332. Marta Braga M, Rocha A, Nascimento H, et al. Long-term effects of cardiac rehabilitation in obese patients. *European Journal of Heart Failure* 2017; 19: 490–491.
333. Minneboo M, Lachman S, Snaterse M, et al. Community-Based Lifestyle Intervention in Patients With Coronary Artery Disease: The RESPONSE-2 Trial. *Journal of the American College of Cardiology* 2017; 70: 318–327.
334. Pardaens S, Willems AM, Clays E, et al. The impact of drop-out in cardiac rehabilitation on outcome among coronary artery disease patients. *European journal of preventive cardiology* 2017; 24: 1490–1497.

335. Peurois J and Dibao C. Six years follow-up of patient's adherence to medical, biological and clinical optimal therapy and recommendations after myocardial infarction. *Archives of Cardiovascular Diseases Supplements* 2017; 9 (1): 26.
336. Pieters K, Spronk A, Sunamura M, et al. Short- and Longer-Term Association Between Body Mass Index and Health Status in Cardiac Rehabilitation Patients. *Journal of cardiopulmonary rehabilitation and prevention* 2017.
337. Prince SA, Laflamme M, Harris J, et al. An Evaluation of FrancoForme: A CASE-MANAGED HOME-BASED PRIMARY AND SECONDARY CARDIOVASCULAR DISEASE PREVENTION PROGRAM FOR FRENCH-SPEAKING CANADIANS. *Journal of cardiopulmonary rehabilitation and prevention* 2017; 37: 437–444.
338. Puymirat E, Simon T, Cayla G, et al. Acute Myocardial Infarction: Changes in Patient Characteristics, Management, and 6-Month Outcomes Over a Period of 20 Years in the FAST-MI Program (French Registry of Acute ST-Elevation or Non-ST-Elevation Myocardial Infarction) 1995 to 2015. *Circulation* 2017; 136: 1908–1919.
339. Taylor C, Tsakirides C, Moxon J, et al. Exercise dose and all-cause mortality within extended cardiac rehabilitation: a cohort study. *Open heart* 2017; 4: e000623.
340. Zhao M, Klipstein-Grobusch K, Wang X, et al. Cardioprotective medication use in secondary prevention after myocardial infarction in China: A systematic review and meta-analysis. *European Journal of Preventive Cardiology* 2017; 24 (1 Supplement 1): S143.
341. Zullo MD, Gathright EC, Dolansky MA, et al. Influence of Depression on Utilization of Cardiac Rehabilitation Postmyocardial Infarction: A STUDY OF 158 991 MEDICARE BENEFICIARIES. *Journal of cardiopulmonary rehabilitation and prevention* 2017; 37: 22–29.
342. Bertelsen JB, Dehbrez NT, Refsgaard J, et al. Shared care versus hospital-based cardiac rehabilitation: a cost-utility analysis based on a randomised controlled trial. *Open heart* 2018; 5: e000584.
343. Cao R, Hong Y, Zheng H, et al. Trial progress of aerobic exercise-based cardiac rehabilitation in chinese patients with atherosclerotic heart disease. *Atherosclerosis Supplements* 2018; 32: 155–156.

344. Colantonio LD, Brown TM, Bittner VA, et al. Risk for recurrent events among patients receiving intensive medical management following myocardial infarction. *Circulation* 2018; 137.
345. Cordero A, Bertomeu-Gonzalez V, Moreno-Arribas J, et al. Prognosis and lipid profile improvement by a specialized outpatient clinic for acute coronary syndrome patients. *Atherosclerosis* 2018; 275: 28–34.
346. Dorje T, Zhao G, Scheer A, et al. SMARTphone and social media-based Cardiac Rehabilitation and Secondary Prevention (SMART-CR/SP) for patients with coronary heart disease in China: a randomised controlled trial protocol. *BMJ open* 2018; 8: e021908.
347. Flint K, Kennedy K, Arnold SV, et al. Slow Gait Speed and Cardiac Rehabilitation Participation in Older Adults After Acute Myocardial Infarction. *Journal of the American Heart Association* 2018; 7.
348. Ghisi GLM, Chaves G, Bennett A, et al. The Paucity of Data Addressing the Effects of Cardiac Rehabilitation on Mortality and Morbidity in Women. *The Canadian journal of cardiology* 2018; 34: 502 e1-502 e2.
349. Krstacic G, Dendale P, Frederix I, et al. The role of ambulatory cardiac rehabilitation in improvement of psychocardiac status, quality of life and long-term prognosis after acute coronary syndrome. *European Journal of Preventive Cardiology* 2018; 25: S46.
350. Kruchinova SV, Kosmacheva ED and Stanislav Raff S. Long-term outcomes of rehabilitation in patients with acute coronary syndrome by the data of the total ACS register in the Krasnodar territory. *European Journal of Preventive Cardiology* 2018; 25: S26.
351. Li S, Fonarow GC, Mukamal K, et al. Sex and Racial Disparities in Cardiac Rehabilitation Referral at Hospital Discharge and Gaps in Long-Term Mortality. *Journal of the American Heart Association* 2018; 7.
352. Long L, Anderson L, Dewhirst AM, et al. Exercise-based cardiac rehabilitation for adults with stable angina. *The Cochrane database of systematic reviews* 2018; 2: CD012786.
353. Maessen M, Eijsvogels T, Bakker E, et al. Impact of cardiovascular disease diagnosis on all-cause mortality reductions after cardiac rehabilitation. *European Journal of Preventive Cardiology* 2018; 25: S16.

354. Moore N, Droz-Perroteau C, Blin P, et al. Long-term survival after myocardial infarction in a six-year follow-up cohort, eole. *Journal of the American College of Cardiology* 2018; 71.
355. Nilsson BB, Lunde P, Groggaard HK, et al. Long-Term Results of High-Intensity Exercise-Based Cardiac Rehabilitation in Revascularized Patients for Symptomatic Coronary Artery Disease. *American Journal of Cardiology* 2018; 121: 21–26.
356. Toshie Tanaka T, Furukawa S, Nakaïke R, et al. Effect of outpatient cardiac rehabilitation program on outcome of elderly patients, especially in frailty status. *European Journal of Preventive Cardiology* 2018; 25: S138.
357. Stroup DF, Berlin JA, Morton SC, et al. Meta-analysis of observational studies in epidemiology: a proposal for reporting. *JAMA* 2000; 283: 2008–2012.
358. Liberati A, Altman DG, Tetzlaff J, et al. The PRISMA statement for reporting systematic reviews and meta-analyses of studies that evaluate health care interventions: explanation and elaboration, United States, 2009 Jul 21.
